# Supplementary material for: Signaling Complexity Measured by Shannon Entropy and Its Application in Personalized Medicine
Source: Front Genet. 2019 Oct 21;10:930. doi: 10.3389/fgene.2019.00930 (PMC6816034; doi:10.3389/fgene.2019.00930)
Supplement: Supplementary file 1 [file Table_1.xls]

## Sheet: Plan1
GeneSymbol	UniprotKB
A1BG	P04217
A2BP1	Q9NWB1
A2M	P01023
A4GALT	Q9NPC4
AAAS	Q9NRG9
AAMP	Q13685
AANAT	Q16613
AARS	P49588
AARS2	Q5JTZ9
AARSD1	Q9BTE6
AASDHPPT	Q9NRN7
AATF	Q9NY61
ABAT	P80404
ABCA1	O95477
ABCA2	Q9BZC7
ABCA3	Q99758
ABCA5	Q8WWZ7
ABCB1	P08183
ABCB11	O95342
ABCB4	P21439
ABCB6	Q9NP58
ABCB8	Q9NUT2
ABCC1	P33527
ABCC2	Q92887
ABCC3	O15438
ABCC5	O15440
ABCC6	O95255
ABCC9	Q8N4N7
ABCD1	P33897
ABCD2	Q9UBJ2
ABCD3	P28288
ABCD4	O14678
ABCF1	Q8NE71
ABCF2	Q9UG63
ABCF3	Q9NUQ8
ABCG2	Q9UNQ0
ABCG4	Q9H172
ABCG5	Q9H222
ABCG8	Q9H221
ABHD15	Q6UXT9
ABHD3	Q8WU67
ABHD4	Q8TB40
ABHD5	Q8WTS1
ABI1	Q8IZP0
ABI2	Q9NYB9
ABI3	Q9P2A4
ABI3BP	Q7Z7G0
ABL1	P00519
ABL2	P42684
ABLIM1	O14639
ABLIM2	Q6H8Q1
ABLIM3	O94929
ABRA	Q8N0Z2
ABT1	Q9ULW3
ABTB1	Q969K4
ACACA	Q13085
ACACB	O00763
ACAD10	Q6JQN1
ACAD8	Q9UKU7
ACAD9	Q9H845
ACADM	P11310
ACADS	P16219
ACADVL	P49748
ACAN	P16112
ACAP1	Q15027
ACAP3	Q96P50
ACAT1	P24752
ACAT2	Q9BWD1
ACBD3	Q9H3P7
ACBD6	Q9BR61
ACCS	Q96QU6
ACD	Q96AP0
ACE2	Q9BYF1
ACHE	P22303
ACIN1	Q9UKV3
ACLY	P53396
ACMSD	Q8TDX5
ACO1	P21399
ACOT13	Q9NPJ3
ACOT2	P49753
ACOT7	O00154
ACP1	P24666
ACP5	P13686
ACP6	Q9NPH0
ACPP	P15309
ACSBG1	Q96GR2
ACSF2	Q96CM8
ACSL1	P33121
ACSL3	O95573
ACSL4	O60488
ACSL6	Q9UKU0
ACSM5	Q6NUN0
ACSS2	Q9NR19
ACSS3	Q9H6R3
ACTA1	P68133
ACTA2	P62736
ACTB	P60709
ACTC1	P68032
ACTG1	P63261
ACTL6A	O96019
ACTL6B	O94805
ACTN1	P12814
ACTN2	P35609
ACTN3	Q08043
ACTN4	O43707
ACTR1A	P61163
ACTR1B	P42025
ACTR2	P61160
ACTR3	P61158
ACTR3B	Q9P1U1
ACTR5	Q9H9F9
ACTR8	Q9H981
ACVR1B	P36896
ACVR1C	Q8NER5
ACVR2A	P27037
ACVR2B	Q13705
ACVRL1	P37023
ACY1	Q03154
ACY3	Q96HD9
ADA	P00813
ADAM10	O14672
ADAM15	Q13444
ADAM17	P78536
ADAM19	Q9H013
ADAM20	O43506
ADAM22	Q9P0K1
ADAM23	O75077
ADAM33	Q9BZ11
ADAM8	P78325
ADAM9	Q13443
ADAMTS10	Q9H324
ADAMTS12	P58397
ADAMTS4	O75173
ADAMTS5	Q9UNA0
ADAMTS7	Q9UKP4
ADAMTSL2	Q86TH1
ADAMTSL4	Q6UY14
ADAP1	O75689
ADAP2	Q9NPF8
ADAR	P55265
ADARB1	P78563
ADAT2	Q7Z6V5
ADAT3	Q96EY9
ADCK1	Q86TW2
ADCK4	Q96D53
ADCK5	Q3MIX3
ADCY3	O60266
ADCY4	Q8NFM4
ADCY6	O43306
ADCY7	P51828
ADCYAP1	P18509
ADCYAP1R1	P41586
ADD1	P35611
ADD3	Q9UEY8
ADH1A	P07327
ADH1B	P00325
ADH5	P11766
ADH6	P28332
ADI1	Q9BV57
ADIPOR1	Q96A54
ADIPOR2	Q86V24
ADK	P55263
ADNP	Q9H2P0
ADNP2	Q6IQ32
ADORA1	P30542
ADORA2A	P29274
ADPGK	Q9BRR6
ADPRH	P54922
ADPRHL2	Q9NX46
ADRA1A	P35348
ADRA1B	P35368
ADRA1D	P25100
ADRB1	P08588
ADRB2	P07550
ADRBK1	P25098
ADRBK2	P35626
ADRM1	Q16186
ADSL	P30566
ADSS	P30520
ADSSL1	Q8N142
AEBP1	Q8IUX7
AEBP2	Q6ZN18
AES	Q08117
AFAP1L1	Q8TED9
AFARP1	Q8NHP2
AFF1	P51825
AFF2	P51816
AFF4	Q9UHB7
AFG3L2	Q9Y4W6
AFP	P02771
AFTPH	Q6ULP2
AG2	O95994
AGAP1	Q9UPQ3
AGAP2	Q99490
AGBL5	Q8NDL9
AGER	Q15109
AGFG1	P52594
AGGF1	Q8N302
AGL	P35573
AGPAT1	Q99943
AGPAT2	O15120
AGPAT3	Q9NRZ7
AGPAT6	Q86UL3
AGPS	O00116
AGR2	O95994
AGR3	Q8TD06
AGRN	O00468
AGT	P01019
AGTPBP1	Q9UPW5
AGTR2	P50052
AGTRAP	Q6RW13
AGXT	P21549
AGXT2	Q9BYV1
AGXT2L2	Q8IUZ5
AHCTF1	Q8WYP5
AHCY	P23526
AHCYL1	O43865
AHCYL2	Q96HN2
AHDC1	Q5TGY3
AHI1	Q8N157
AHNAK	Q09666
AHR	P35869
AHSA1	O95433
AHSG	P02765
AHSP	Q9NZD4
AICDA	Q9GZX7
AIDA	Q96BJ3
AIF1L	Q9BQI0
AIFM1	O95831
AIG1	Q9NVV5
AIM2	O14862
AIMP1	Q12904
AIMP2	Q13155
AIP	O00170
AIPL1	Q9NZN9
AIRE	O43918
AJAP1	Q9UKB5
AK1	P00568
AK2	P54819
AK5	Q9Y6K8
AKAP1	Q92667
AKAP11	Q9UKA4
AKAP12	Q02952
AKAP13	Q12802
AKAP14	Q86UN6
AKAP2	Q9Y2D5
AKAP3	O75969
AKAP5	P24588
AKAP6	Q13023
AKAP8L	Q9ULX6
AKAP9	Q99996
AKD1	Q5TCS8
AKIRIN2	Q53H80
AKNA	Q7Z591
AKR1A1	P14550
AKR1B1	P15121
AKR1B10	O60218
AKR1C1	Q04828
AKR1C3	P42330
AKR7A2	O43488
AKR7A3	O95154
AKT1	P31749
AKT1S1	Q96B36
AKT2	P31751
AKT3	Q9Y243
AKTIP	Q9H8T0
ALAS1	P13196
ALB	P02768
ALB	Q8IUK7
ALCAM	Q13740
ALDH16A1	Q8IZ83
ALDH1A1	P00352
ALDH2	P05091
ALDH4A1	P30038
ALDH5A1	P51649
ALDH6A1	Q02252
ALDH7A1	P49419
ALDH9A1	P49189
ALDOA	P04075
ALDOB	P05062
ALG11	Q2TAA5
ALG12	Q9BV10
ALG13	Q9NP73
ALG8	Q9BVK2
ALG9	Q9H6U8
ALK	Q9UM73
ALKBH3	Q96Q83
ALKBH4	Q9NXW9
ALMS1	Q8TCU4
ALOX12	P18054
ALOX12B	O75342
ALOX5	P09917
ALOX5AP	P20292
ALPK1	Q96QP1
ALPL	P05186
ALS2	Q96Q42
ALS2CR11	Q53TS8
ALS2CR12	Q96Q35
ALS2CR4	Q96Q45
ALS2CR8	Q8N187
AMAC1	P55774
AMBP	P02760
AMBRA1	Q9C0C7
AMDHD2	Q9Y303
AMFR	Q9UKV5
AMH	P03971
AMHR2	Q16671
AMICA1	Q86YT9
AMMECR1	Q9Y4X0
AMMECR1L	Q6DCA0
AMOT	Q4VCS5
AMOTL1	Q8IY63
AMOTL2	Q9Y2J4
AMPD1	P23109
AMPH	P49418
AMY1A	P04745
AMY2A	P04746
AMY2B	P19961
ANAPC1	Q9H1A4
ANAPC10	Q9UM13
ANAPC11	Q9NYG5
ANAPC13	Q9BS18
ANAPC16	Q96DE5
ANAPC2	Q9UJX6
ANAPC4	Q9UJX5
ANAPC5	Q9UJX4
ANG	P03950
ANGPT1	Q15389
ANGPT2	O15123
ANGPTL3	Q9Y5C1
ANGPTL4	Q9BY76
ANK2	Q01484
ANK3	Q12955
ANKFY1	Q9P2R3
ANKH	Q9HCJ1
ANKHD1	Q8IWZ3
ANKLE2	Q86XL3
ANKRD1	Q15327
ANKRD11	Q6UB99
ANKRD12	Q6UB98
ANKRD13A	Q8IZ07
ANKRD13D	Q6ZTN6
ANKRD17	O75179
ANKRD23	Q86SG2
ANKRD24	Q8TF21
ANKRD26	Q9UPS8
ANKRD27	Q96NW4
ANKRD28	O15084
ANKRD35	Q8N283
ANKRD36B	Q8N2N9
ANKRD36BP1	Q96IX9
ANKRD44	Q8N8A2
ANKRD5	Q9NU02
ANKRD50	Q9ULJ7
ANKRD52	Q8NB46
ANKRD6	Q9Y2G4
ANKRD7	Q92527
ANKS1A	Q92625
ANKS1B	Q7Z6G8
ANKS3	Q6ZW76
ANKS6	Q68DC2
ANO1	Q5XXA6
ANO6	Q4KMQ2
ANO8	Q9HCE9
ANO9	A1A5B4
ANP32A	P39687
ANP32B	Q92688
ANP32E	Q9BTT0
ANPEP	P15144
ANTXR1	Q9H6X2
ANTXR2	P58335
ANUBL1	Q86XD8
ANXA1	P04083
ANXA10	Q9UJ72
ANXA11	P50995
ANXA2	P07355
ANXA3	P12429
ANXA4	P09525
ANXA5	P08758
ANXA6	P08133
ANXA7	P20073
ANXA8	P13928
ANXA9	O76027
AOC3	Q16853
AOX1	Q06278
AP1AR	Q63HQ0
AP1B1	Q10567
AP1G1	O43747
AP1G2	O75843
AP1M1	Q9BXS5
AP1M2	Q9Y6Q5
AP1S1	P61966
AP1S2	P56377
AP2A1	O95782
AP2A2	O94973
AP2B1	P63010
AP2M1	Q96CW1
AP2S1	P53680
AP3B1	O00203
AP3B2	Q13367
AP3D1	O14617
AP3S2	P59780
AP4B1	Q9Y6B7
AP4M1	O00189
AP4S1	Q9Y587
APAF1	O14727
APBA1	Q02410
APBA2	Q99767
APBA3	O96018
APBB1	O00213
APBB1IP	Q7Z5R6
APBB2	Q92870
APBB3	O95704
APC	P25054
APC2	O95996
APCS	P02743
APEH	P13798
APEX1	P27695
APEX2	Q9UBZ4
APH1A	Q96BI3
API5	Q9BZZ5
APIP	Q96GX9
APITD1	Q8N2Z9
APLF	Q8IW19
APLN	Q9ULZ1
APLP1	P51693
APLP2	Q06481
APOA1	P02647
APOA2	P02652
APOB	P04114
APOBEC3C	Q9NRW3
APOBEC3G	Q9HC16
APOC2	P02655
APOD	P05090
APOE	P02649
APOH	P02749
APOL3	O95236
APOL5	Q9BWW9
APOM	O95445
APP	P05067
APPBP2	Q92624
APPL1	Q9UKG1
APPL2	Q8NEU8
APRT	P07741
APTX	Q7Z2E3
AQP1	P29972
AQP5	P55064
AQR	O60306
AR	P10275
ARAF	P10398
ARAP1	Q96P48
ARAP2	Q8WZ64
ARAP3	Q8WWN8
ARC	Q7LC44
ARCN1	P48444
AREG	P15514
ARF1	P84077
ARF3	P61204
ARF4	P18085
ARF6	P62330
ARFGAP1	Q8N6T3
ARFGEF1	Q9Y6D6
ARFGEF2	Q9Y6D5
ARFIP2	P53365
ARG1	P05089
ARGLU1	Q9NWB6
ARHGAP1	Q07960
ARHGAP10	A1A4S6
ARHGAP11A	Q6P4F7
ARHGAP15	Q53QZ3
ARHGAP17	Q68EM7
ARHGAP18	Q8N392
ARHGAP19	Q14CB8
ARHGAP21	Q5T5U3
ARHGAP22	Q7Z5H3
ARHGAP26	Q9UNA1
ARHGAP27	Q6ZUM4
ARHGAP29	Q52LW3
ARHGAP30	Q7Z6I6
ARHGAP31	Q2M1Z3
ARHGAP32	A7KAX9
ARHGAP33	O14559
ARHGAP4	P98171
ARHGAP5	Q13017
ARHGAP9	Q9BRR9
ARHGDIA	P52565
ARHGDIB	P52566
ARHGEF1	Q92888
ARHGEF10	O15013
ARHGEF10L	Q9HCE6
ARHGEF11	O15085
ARHGEF12	Q9NZN5
ARHGEF16	Q5VV41
ARHGEF17	Q96PE2
ARHGEF18	Q6ZSZ5
ARHGEF19	Q8IW93
ARHGEF2	Q92974
ARHGEF4	Q9NR80
ARHGEF5	Q12774
ARHGEF6	Q15052
ARHGEF7	Q14155
ARID1A	O14497
ARID1B	Q8NFD5
ARID2	Q68CP9
ARID3A	Q99856
ARID4A	P29374
ARID4B	Q4LE39
ARID5A	Q03989
ARIH1	Q9Y4X5
ARIH2	O95376
ARL1	P40616
ARL11	Q969Q4
ARL14	Q8N4G2
ARL15	Q9NXU5
ARL2	P36404
ARL2BP	Q9Y2Y0
ARL3	P36405
ARL4D	P49703
ARL6	Q9H0F7
ARL6IP1	Q15041
ARL6IP4	Q66PJ3
ARL6IP5	O75915
ARL8B	Q9NVJ2
ARMC1	Q9NVT9
ARMC5	Q96C12
ARMC6	Q6NXE6
ARMC7	Q9H6L4
ARMC8	Q8IUR7
ARMCX2	Q7L311
ARMCX3	Q9UH62
ARNT	P27540
ARNT2	Q9HBZ2
ARNTL	O00327
ARNTL2	Q8WYA1
ARPC1A	Q92747
ARPC1B	O15143
ARPC2	O15144
ARPC3	O15145
ARPC4	P59998
ARPC5	O15511
ARPC5L	Q9BPX5
ARPP19	P56211
ARR3	P36575
ARRB1	P49407
ARRB2	P32121
ARRDC1	Q8N5I2
ARRDC3	Q96B67
ARSA	P15289
ARSF	P54793
AS3MT	Q9HBK9
ASAH1	Q13510
ASAM	Q9H6B4
ASAP1	Q9ULH1
ASAP2	O43150
ASB1	Q9Y576
ASB10	Q8WXI3
ASB12	Q8WXK4
ASB13	Q8WXK3
ASB16	Q96NS5
ASB17	Q8WXJ9
ASB2	Q96Q27
ASB3	Q9Y575
ASB4	Q9Y574
ASB6	Q9NWX5
ASB7	Q9H672
ASB8	Q9H765
ASB9	Q96DX5
ASCC2	Q9H1I8
ASCC3	Q8N3C0
ASF1A	Q9Y294
ASF1B	Q9NVP2
ASGR1	P07306
ASGR2	P07307
ASH2L	Q9UBL3
ASL	P04424
ASMT	P46597
ASMTL	O95671
ASNA1	O43681
ASNS	P08243
ASPA	P45381
ASPH	Q12797
ASPM	Q8IZT6
ASPSCR1	Q9BZE9
ASRGL1	Q7L266
ASS1	P00966
ASXL1	Q8IXJ9
ASXL2	Q76L83
ATAD3A	Q9NVI7
ATCAY	Q86WG3
ATE1	O95260
ATF2	P15336
ATF3	P18847
ATF4	P18848
ATF5	Q9Y2D1
ATF6	P18850
ATF6B	Q99941
ATF7	P17544
ATF7IP	Q6VMQ6
ATG10	Q9H0Y0
ATG12	O94817
ATG16L1	Q676U5
ATG16L2	Q8NAA4
ATG2A	Q2TAZ0
ATG3	Q9NT62
ATG4A	Q8WYN0
ATG4B	Q9Y4P1
ATG4C	Q96DT6
ATG5	Q9H1Y0
ATG7	O95352
ATG9A	Q7Z3C6
ATIC	P31939
ATL1	Q8WXF7
ATL2	Q8NHH9
ATL3	Q6DD88
ATM	Q13315
ATN1	P54259
ATOH8	Q96SQ7
ATP12A	P54707
ATP13A1	Q9HD20
ATP13A2	Q9NQ11
ATP1A1	P05023
ATP1A3	P13637
ATP1A4	Q13733
ATP1B1	P05026
ATP1B3	P54709
ATP2A1	O14983
ATP2A2	P16615
ATP2A3	Q93084
ATP2B1	P20020
ATP2B2	Q01814
ATP2B3	Q16720
ATP2B4	P23634
ATP4B	P51164
ATP5A1	P25705
ATP5B	P06576
ATP5C1	P36542
ATP5D	P30049
ATP5E	P56381
ATP5F1	P24539
ATP5G2	Q06055
ATP5G3	P48201
ATP5I	P56385
ATP5J	P18859
ATP5J2	P56134
ATP5L	O75964
ATP5O	P48047
ATP6AP2	O75787
ATP6V0A1	Q93050
ATP6V0A2	Q9Y487
ATP6V0C	P27449
ATP6V0D2	Q8N8Y2
ATP6V1A	P38606
ATP6V1B1	P15313
ATP6V1C1	P21283
ATP6V1E1	P36543
ATP6V1E2	Q96A05
ATP6V1G1	O75348
ATP6V1G2	O95670
ATP6V1H	Q9UI12
ATP7A	Q04656
ATPAF1	Q5TC12
ATPAF2	Q8N5M1
ATPIF1	Q9UII2
ATR	Q13535
ATRIP	Q8WXE1
ATRN	O75882
ATRX	P46100
ATXN1	P54253
ATXN10	Q9UBB4
ATXN1L	P0C7T5
ATXN2	Q99700
ATXN2L	Q8WWM7
ATXN3	P54252
ATXN7	O15265
ATXN7L1	Q9ULK2
ATXN7L3	Q14CW9
AUP1	Q9Y679
AURKA	O14965
AURKAIP1	Q9NWT8
AURKB	Q96GD4
AURKC	Q9UQB9
AUTS2	Q8WXX7
AVEN	Q9NQS1
AVPI1	Q5T686
AXIN1	O15169
AXIN2	Q9Y2T1
AXL	P30530
AZI1	Q9UPN4
AZI2	Q9H6S1
AZIN1	O14977
AZU1	P20160
B2M	P61769
B3GALT2	O43825
B3GALT4	O96024
B3GAT1	Q9P2W7
B3GAT3	O94766
B3GNT2	Q9NY97
B3GNT4	Q9C0J1
B3GNTL1	Q67FW5
B4GALT1	P15291
B4GALT3	O60512
B9D1	Q9UPM9
B9D2	Q9BPU9
BAALC	Q8WXS3
BAD	Q92934
BAG1	Q99933
BAG2	O95816
BAG3	O95817
BAG5	Q9UL15
BAHCC1	Q9P281
BAHD1	Q8TBE0
BAI1	O14514
BAIAP2	Q9UQB8
BAIAP2L1	Q9UHR4
BAIAP3	O94812
BAK1	Q16611
BAMBI	Q13145
BANF1	O75531
BANK1	Q8NDB2
BANP	Q8N9N5
BAP1	Q92560
BARD1	Q99728
BARHL1	Q9BZE3
BARX1	Q9HBU1
BASP1	P80723
BAT1	P82251
BAT1	Q13838
BAT2	P48634
BAT2L1	Q5JSZ5
BAT2L2	Q9Y520
BAT3	P46379
BAT4	O95872
BAT5	O95870
BATF	Q16520
BATF2	Q8N1L9
BAX	Q07812
BAZ1A	Q9NRL2
BAZ1B	Q9UIG0
BAZ2A	Q9UIF9
BAZ2B	Q9UIF8
BBC3	Q9BXH1
BBOX1	O75936
BBS1	Q8NFJ9
BBS10	Q8TAM1
BBS12	Q6ZW61
BBS2	Q9BXC9
BBS4	Q96RK4
BBS5	Q8N3I7
BBS7	Q8IWZ6
BBS9	Q3SYG4
BBX	Q8WY36
BCAP29	Q9UHQ4
BCAP31	P51572
BCAR1	P56945
BCAR3	O75815
BCAS2	O75934
BCAS3	Q9H6U6
BCAT1	P54687
BCAT2	O15382
BCCIP	Q9P287
BCHE	P06276
BCKDHA	P12694
BCKDHB	P21953
BCKDK	O14874
BCL10	O95999
BCL11A	Q9H165
BCL11B	Q9C0K0
BCL2	P10415
BCL2A1	Q16548
BCL2L1	Q07817
BCL2L11	O43521
BCL2L12	Q9HB09
BCL2L13	Q9BXK5
BCL2L14	Q9BZR8
BCL2L2	Q92843
BCL3	P20749
BCL6	P41182
BCL7A	Q4VC05
BCL9	O00512
BCL9L	Q86UU0
BCLAF1	Q9NYF8
BCOR	Q6W2J9
BCR	P11274
BCS1L	Q9Y276
BDNF	P23560
BECN1	Q14457
BEGAIN	Q9BUH8
BEND5	Q7L4P6
BEND7	Q8N7W2
BEST4	Q8NFU0
BET1L	Q9NYM9
BEX1	Q9HBH7
BEX2	Q9BXY8
BFAR	Q9NZS9
BGN	P21810
BHLHE40	O14503
BHMT	Q93088
BICD1	Q96G01
BICD2	Q8TD16
BID	P55957
BIK	Q13323
BIN1	O00499
BIN2	Q9UBW5
BIN3	Q9NQY0
BIRC2	Q13490
BIRC3	Q13489
BIRC5	O15392
BIRC6	Q9NR09
BIRC7	Q96CA5
BIRC8	Q96P09
BLK	P51451
BLM	P54132
BLMH	Q13867
BLNK	Q8WV28
BLOC1S1	P78537
BLOC1S2	Q6QNY1
BLOC1S3	Q6QNY0
BLVRA	P53004
BLVRB	P30043
BLZF1	Q9H2G9
BMF	Q96LC9
BMI1	P35226
BMP1	P13497
BMP10	O95393
BMP2	P12643
BMP3	P12645
BMP4	P12644
BMP8A	Q7Z5Y6
BMPR1A	P36894
BMPR1B	O00238
BMPR2	Q13873
BMX	P51813
BNIP2	Q12982
BNIP3	Q12983
BNIP3L	O60238
BNIPL	Q7Z465
BOK	Q9UMX3
BOLA1	Q9Y3E2
BOLL	Q8N9W6
BOP1	Q14137
BPGM	P07738
BPNT1	O95861
BPTF	Q12830
BRAF	P15056
BRAP	Q7Z569
BRCA1	P38398
BRCA2	P51587
BRCC3	P46736
BRD1	O95696
BRD2	P25440
BRD3	Q15059
BRD4	O60885
BRD7	Q9NPI1
BRD8	Q9H0E9
BRDT	Q58F21
BRE	Q9NXR7
BRF1	Q92994
BRI3BP	Q8WY22
BRIP1	Q9BX63
BRIX1	Q8TDN6
BRMS1	Q9HCU9
BRMS1L	Q5PSV4
BRP44	O95563
BRPF1	P55201
BRPF3	Q9ULD4
BRSK1	Q8TDC3
BRWD1	Q9NSI6
BSDC1	Q9NW68
BSG	P35613
BSND	Q8WZ55
BSPRY	Q5W0U4
BST1	Q10588
BST2	Q10589
BTAF1	O14981
BTBD1	Q9H0C5
BTBD10	Q9BSF8
BTBD12	Q8IY92
BTBD2	Q9BX70
BTBD3	Q9Y2F9
BTBD6	Q96KE9
BTF3	P20290
BTG1	P62324
BTG2	P78543
BTG3	Q14201
BTK	Q06187
BTLA	Q7Z6A9
BTN2A2	Q8WVV5
BTN2A3	Q96KV6
BTRC	Q9Y297
BUB1	O43683
BUB1B	O60566
BUB3	O43684
BUD31	P41223
BYSL	Q13895
BZW1	Q7L1Q6
BZW2	Q9Y6E2
C10ORF116	Q15847
C10ORF118	Q7Z3E2
C10ORF119	Q9BTE3
C10orf12	Q8N655
C10ORF137	Q3B7T1
C10ORF18	Q5VWN6
C10ORF2	Q96RR1
C10ORF2	Q9H6V3
C10orf35	Q96D05
C10ORF4	Q70Z53
C10ORF46	Q86Y37
C10orf54	Q9H7M9
C10orf62	Q5T681
C10orf82	Q8WW14
C10ORF96	P0C7W6
C11orf16	Q9NQ32
C11ORF2	Q9UID3
C11orf24	Q96F05
C11ORF41	Q6ZVL6
C11ORF46	Q8N8R7
C11orf48	Q9BQE6
C11orf49	Q9H6J7
C11orf54	Q9H0W9
C11orf57	Q6ZUT1
C11ORF59	Q6IAA8
C11ORF61	Q6P1R3
C11orf63	Q6NUN7
C11orf65	Q8NCR3
C11orf68	Q9H3H3
C11orf71	Q6IPW1
C11orf73	Q53FT3
C11orf74	Q86VG3
C11ORF75	Q9NRQ5
C11orf83	Q6UW78
C12ORF11	Q9NVM9
C12ORF12	Q8TC90
C12ORF23	Q8WUH6
C12ORF35	Q9HCM1
C12ORF41	Q9H9L4
C12ORF44	Q9BSB4
C12orf45	Q8N5I9
C12orf49	Q9H741
C12ORF51	Q9Y4D8
C12ORF52	Q96K30
C12ORF62	Q96I36
C12orf65	Q9H3J6
C13ORF33	Q5VYS4
C13ORF34	Q6PGQ7
C13ORF37	Q08AG7
C14orf1	Q9UKR5
C14ORF102	Q9H7Z3
C14ORF118	Q9NWQ4
C14orf119	Q9NWQ9
C14ORF129	Q9P0R6
C14ORF135	Q63HM2
C14ORF147	Q969W0
C14ORF156	Q9GZT3
C14orf166	Q9Y224
C14ORF176	P0C7T8
C14ORF43	A0PJD3
C14ORF48	Q8NCU1
C14ORF68	Q6Q0C1
C15ORF21	Q86SG4
C15ORF23	Q9Y448
C15orf41	Q9Y2V0
C15ORF63	Q9NX55
C16orf45	Q96MC5
C16ORF48	Q9H0I2
C16ORF5	Q9H305
C16ORF53	Q9BTK6
C16ORF57	Q9BQ65
C16orf58	Q96GQ5
C16orf59	Q7L2K0
C16ORF63	Q96NB1
C16ORF68	Q9BUU2
C16orf70	Q9BSU1
C16orf74	Q96GX8
C16ORF80	Q9Y6A4
C17ORF103	Q8N6N6
C17ORF28	Q8IV36
C17orf53	Q8N3J3
C17ORF61	Q8N2U0
C17orf62	Q9BQA9
C17ORF63	Q8WU58
C17ORF65	Q495Z4
C17ORF68	Q2NKJ3
C17ORF79	Q9NQ92
C17ORF81	Q8TE02
C17orf82	Q86X59
C17orf85	Q53F19
C17ORF95	Q86XA0
C17orf97	Q6ZQX7
C18ORF10	Q68CL5
C18ORF2	Q7LBR1
C18orf25	Q96B23
C18ORF45	B2RAB7
C18ORF55	Q9BVV7
C18ORF56	Q8TAI1
C18orf8	Q96DM3
C19orf10	Q969H8
C19orf12	Q9NSK7
C19ORF2	O94763
C19orf25	Q9UFG5
C19ORF29	Q8WUQ7
C19ORF39	Q6NVH7
C19orf43	Q9BQ61
C19orf44	Q9H6X5
C19ORF46	Q8N205
C19orf47	Q8N9M1
C19ORF50	Q9BQD3
C19orf53	Q9UNZ5
C19orf57	Q0VDD7
C19ORF59	Q8IX19
C19ORF6	Q4ZIN3
C19orf60	Q96EN9
C19ORF61	Q9H0W8
C19ORF62	Q9NWV8
C19orf73	Q9NVV2
C1D	Q13901
C1GALT1	Q9NS00
C1ORF103	Q5T3J3
C1orf106	Q3KP66
C1ORF107	Q68CQ4
C1orf109	Q9NX04
C1orf111	Q5T0L3
C1ORF114	Q5TID7
C1ORF116	Q9BPY1
C1ORF116	Q9BW04
C1orf122	Q6ZSJ8
C1orf123	Q9NWV4
C1orf131	Q8NDD1
C1ORF144	Q7Z422
C1ORF156	O95568
C1orf174	Q8IYL3
C1ORF182	Q96A04
C1ORF190	Q96LR2
C1ORF212	Q96EX1
C1orf216	Q8TAB5
C1orf220	Q5T0J3
C1ORF27	Q5SWX8
C1ORF31	Q5JTJ3
C1ORF35	Q9BU76
C1ORF38	Q5TEJ8
C1ORF49	Q5T0J7
C1orf50	Q9BV19
C1orf52	Q8N6N3
C1ORF57	Q9BSD7
C1ORF63	Q9BUV0
C1ORF65	Q8N715
C1ORF77	Q9Y3Y2
C1orf85	Q8WWB7
C1ORF89	Q9BU20
C1ORF9	Q9UBS9
C1ORF91	Q8WY98
C1ORF93	Q8TBF2
C1orf94	Q6P1W5
C1QA	P02745
C1QB	P02746
C1QBP	Q07021
C1QC	P02747
C1QTNF1	Q9BXJ1
C1QTNF2	Q9BXJ5
C1QTNF9	P0C862
C1R	P00736
C1S	P09871
C20ORF11	Q9NWU2
C20ORF112	Q96MY1
C20ORF117	O94964
C20ORF12	Q9NVP4
C20ORF185	P59826
C20orf194	Q5TEA3
C20orf195	Q9BVV2
C20ORF20	Q9NV56
C20orf26	Q8NHU2
C20orf27	Q9GZN8
C20ORF3	Q9HDC9
C20ORF30	Q96A57
C20ORF4	Q9Y312
C20ORF43	Q9BY42
C20ORF72	Q9BQP7
C20ORF94	Q5VYV7
C21orf2	O43822
C21orf33	P30042
C21ORF45	Q9NYP9
C21ORF56	Q9H0A9
C21orf59	P57076
C21ORF7	Q9NYK6
C21ORF96	Q9H7H1
C22ORF28	Q9Y3I0
C22orf39	Q6P5X5
C22ORF9	Q6ICG6
C22ORF9	Q8IUY4
C2CD2	Q9Y426
C2ORF18	Q8N357
C2orf27A	Q580R0
C2ORF27B	Q580R0
C2ORF28	Q6UW56
C2ORF29	Q9UKZ1
C2orf42	Q9NWW7
C2orf44	Q9H6R7
C2orf47	Q8WWC4
C2ORF51	Q96LM6
C2ORF56	Q7L592
C2ORF65	Q8TC57
C2orf73	Q8N5S3
C2ORF86	O95876
C2orf88	Q9BSF0
C3	P01024
C3ORF10	Q8WUW1
C3ORF15	Q7Z4T9
C3ORF19	Q6PII3
C3ORF26	Q9BQ75
C3ORF32	Q9Y2M2
C3ORF34	Q96LK0
C3ORF37	Q96FZ2
C3ORF63	Q9UK61
C3ORF75	Q0PNE2
C4A	P0C0L4
C4BPA	P04003
C4ORF14	Q8NC60
C4orf17	Q53FE4
C4orf27	Q9NWY4
C4ORF34	Q96QK8
C4ORF42	Q96CW7
C4ORF43	Q96EY4
C4ORF49	Q8TDB4
C5	P01031
C5ORF13	Q16612
C5orf22	Q49AR2
C5ORF25	Q8NDZ2
C5orf30	Q96GV9
C5ORF41	Q8IUR6
C5orf42	Q9H799
C5ORF44	A5PLN9
C5orf45	Q6NTE8
C5ORF54	Q8IZ13
C5orf55	Q8N2X6
C5ORF62	Q9BZL3
C6ORF105	Q96IZ2
C6ORF108	O43598
C6ORF125	Q9BRT2
C6ORF130	Q9Y530
C6orf136	Q5SQH8
C6ORF142	Q5VWP3
C6ORF145	Q5TGL8
C6orf165	Q8IYR0
C6ORF167	Q6ZRQ5
C6orf203	Q9P0P8
C6orf211	Q9H993
C6orf47	O95873
C6orf62	Q9GZU0
C6ORF97	Q8IYT3
C7orf25	Q9BPX7
C7ORF29	Q96FA7
C7ORF30	Q96EH3
C7orf34	Q96L11
C7ORF36	Q9NRH1
C7orf43	Q8WVR3
C7ORF44	Q9GZY4
C7ORF47	Q8TAP8
C7orf50	Q9BRJ6
C7ORF58	A4D0V7
C7ORF59	Q0VGL1
C7ORF64	Q5RL73
C8orf33	Q9H7E9
C8orf4	Q9NR00
C8ORF41	Q6NXR4
C8orf48	Q96LL4
C8orf74	Q6P047
C9ORF100	Q8N4T4
C9orf131	Q5VYM1
C9orf142	Q9BUH6
C9orf156	Q9BU70
C9orf16	Q9BUW7
C9orf163	Q8N9P6
C9ORF25	Q8IW50
C9ORF30	Q96H12
C9ORF46	Q9HBL7
C9ORF5	Q9H330
C9orf69	H0YL14
C9ORF7	Q9UGQ2
C9orf72	Q96LT7
C9orf78	Q9NZ63
C9orf84	Q5VXU9
C9ORF86	Q3YEC7
C9orf89	Q96LW7
C9orf9	Q96E40
C9ORF98	Q96MA6
CA1	P00915
CA12	O43570
CA2	P00918
CAB39	Q9Y376
CAB39L	Q9H9S4
CABC1	Q8NI60
CABIN1	Q9Y6J0
CABLES1	Q8TDN4
CABP1	Q9NZU7
CACNA1A	O00555
CACNA1B	Q00975
CACNA1C	Q13936
CACNA1F	O60840
CACNA1G	O43497
CACNA1H	O95180
CACNA1I	Q9P0X4
CACNB1	Q02641
CACNB2	Q08289
CACNB3	P54284
CACNG2	Q9Y698
CACYBP	Q9HB71
CAD	P27708
CADM1	Q9BY67
CADM4	Q8NFZ8
CADPS	Q9ULU8
CADPS2	Q86UW7
CALCA	P01258
CALCA	P06881
CALCOCO1	Q9P1Z2
CALCOCO2	Q13137
CALCR	P30988
CALCRL	Q16602
CALHM1	Q8IU99
CALM1	P62158
CALML3	P27482
CALML5	Q9NZT1
CALR	P27797
CALU	O43852
CAMK1D	Q8IU85
CAMK1G	Q96NX5
CAMK2A	Q9UQM7
CAMK2B	Q13554
CAMK2D	Q13557
CAMK4	Q16566
CAMKK1	Q8N5S9
CAMKK2	Q96RR4
CAMKV	Q8NCB2
CAMLG	P49069
CAMSAP1	Q5T5Y3
CAMSAP1L1	Q08AD1
CAMTA2	O94983
CAND1	Q86VP6
CANX	P27824
CAP1	Q01518
CAP2	P40123
CAPG	P40121
CAPN1	P07384
CAPN10	Q9HC96
CAPN11	Q9UMQ6
CAPN2	P17655
CAPN3	P20807
CAPN6	Q9Y6Q1
CAPNS1	P04632
CAPRIN1	Q14444
CAPRIN2	Q6IMN6
CAPZA1	P52907
CAPZA2	P47755
CAPZB	P47756
CARD11	Q9BXL7
CARD14	Q9BXL6
CARD8	Q9Y2G2
CARD9	Q9H257
CARHSP1	Q9Y2V2
CARKD	Q8IW45
CARM1	Q86X55
CARS	P49589
CARTPT	Q16568
CASC3	O15234
CASC5	Q8NG31
CASK	O14936
CASKIN1	Q8WXD9
CASKIN2	Q8WXE0
CASP1	P29466
CASP10	Q92851
CASP2	P42575
CASP3	P42574
CASP4	P49662
CASP5	P51878
CASP6	P55212
CASP7	P55210
CASP8	Q14790
CASP8AP2	Q9UKL3
CASP9	P55211
CASQ2	O14958
CASR	P41180
CAST	P20810
CAT	P04040
CATSPER1	Q8NEC5
CATSPER2	Q96P56
CAV1	Q03135
CAV2	P51636
CAV3	P56539
CBFA2T2	O43439
CBFA2T3	O75081
CBFB	Q13951
CBL	P22681
CBLB	B5MC15
CBLB	Q13191
CBLC	Q9ULV8
CBLL1	Q75N03
CBR1	P16152
CBR3	O75828
CBS	P35520
CBWD1	Q9BRT8
CBWD2	Q8IUF1
CBWD3	Q5JTY5
CBWD6	Q4V340
CBX1	P83916
CBX2	Q14781
CBX3	Q13185
CBX4	O00257
CBX5	P45973
CBX6	O95503
CBX7	O95931
CBX8	Q9HC52
CBY1	Q9Y3M2
CC2D1A	Q6P1N0
CCAR1	Q8IX12
CCDC101	Q96ES7
CCDC104	Q96G28
CCDC107	Q8WV48
CCDC109A	Q8NE86
CCDC11	Q96M91
CCDC112	Q8NEF3
CCDC115	Q96NT0
CCDC116	Q8IYX3
CCDC12	Q8WUD4
CCDC120	Q96HB5
CCDC121	Q6ZUS5
CCDC122	Q5T0U0
CCDC123	Q96ST8
CCDC126	Q96EE4
CCDC127	Q96BQ5
CCDC130	P13994
CCDC136	Q96JN2
CCDC137	Q6PK04
CCDC14	Q49A88
CCDC148	Q8NFR7
CCDC149	Q6ZUS6
CCDC151	A5D8V7
CCDC155	Q8N6L0
CCDC158	Q5M9N0
CCDC17	Q96LX7
CCDC21	Q6P2H3
CCDC22	O60826
CCDC25	Q86WR0
CCDC28A	Q8IWP9
CCDC33	Q8N5R6
CCDC36	Q8IYA8
CCDC37	Q494V2
CCDC42	Q96M95
CCDC45	Q96GE4
CCDC46	Q8N8E3
CCDC47	Q96A33
CCDC50	Q8IVM0
CCDC52	Q8N0Z3
CCDC53	Q9Y3C0
CCDC56	Q9Y2R0
CCDC57	Q2TAC2
CCDC58	Q4VC31
CCDC59	Q9P031
CCDC6	Q16204
CCDC67	Q05D60
CCDC68	Q9H2F9
CCDC69	A6NI79
CCDC7	Q96M83
CCDC74A	Q96AQ1
CCDC74B	Q96LY2
CCDC75	Q8N954
CCDC78	A2IDD5
CCDC82	Q8N4S0
CCDC85A	Q96PX6
CCDC85B	Q15834
CCDC88A	Q3V6T2
CCDC88B	A6NC98
CCDC88C	Q9P219
CCDC90B	Q9GZT6
CCDC91	Q7Z6B0
CCDC92	Q53HC0
CCDC97	Q96F63
CCHCR1	Q8TD31
CCKBR	P32239
CCL11	P51671
CCL13	Q99616
CCL14	Q16627
CCL18	P55774
CCL2	P13500
CCL20	P78556
CCL21	O00585
CCL22	O00626
CCL26	Q9Y258
CCL28	Q9NRJ3
CCL3	P10147
CCL4	P13236
CCL5	P13501
CCM2	Q9BSQ5
CCNA1	P78396
CCNA2	P20248
CCNB1	P14635
CCNB1IP1	Q9NPC3
CCNB2	O95067
CCNC	P24863
CCND1	P24385
CCND2	P30279
CCND3	P30281
CCNDBP1	O95273
CCNE1	P24864
CCNE2	O96020
CCNF	P41002
CCNG1	P51959
CCNH	P51946
CCNI	Q14094
CCNK	O75909
CCNL1	Q9UK58
CCNL2	Q96S94
CCNO	P22674
CCNT1	O60563
CCPG1	Q9ULG6
CCR1	P32246
CCR10	P46092
CCR3	P51677
CCR5	P51681
CCR7	P32248
CCT2	P78371
CCT3	P49368
CCT4	P50991
CCT5	P48643
CCT6A	P40227
CCT7	Q99832
CCT8	P50990
CD14	P08571
CD160	O95971
CD164	Q04900
CD177	Q8N6Q3
CD1A	P06126
CD1B	P29016
CD1C	P29017
CD2	P06729
CD200	P41217
CD22	P20273
CD244	Q9BZW8
CD247	P20963
CD274	Q9NZQ7
CD28	P10747
CD2AP	Q9Y5K6
CD2BP2	O95400
CD300C	Q08708
CD300LF	Q8TDQ1
CD320	Q9NPF0
CD33	P20138
CD34	P28906
CD36	P16671
CD37	P11049
CD37	Q96LM7
CD3D	P04234
CD3E	P07766
CD3EAP	O15446
CD3G	P09693
CD4	P01730
CD40	P25942
CD44	P16070
CD46	P15529
CD47	Q08722
CD48	P09326
CD5	P06127
CD53	P19397
CD55	P08174
CD58	P19256
CD59	P13987
CD5L	O43866
CD6	P30203
CD63	P08962
CD7	P09564
CD72	P21854
CD74	P04233
CD79A	P11912
CD80	P33681
CD81	P60033
CD82	P27701
CD83	Q01151
CD84	Q9UIB8
CD8A	P01732
CD9	P21926
CD93	Q9NPY3
CD96	P40200
CD97	P48960
CD99L2	Q8TCZ2
CDAN1	Q8IWY9
CDC123	O75794
CDC14B	O60729
CDC16	Q13042
CDC20	Q12834
CDC23	Q9UJX2
CDC25A	P30304
CDC25B	P30305
CDC25C	P30307
CDC26	Q8NHZ8
CDC27	P30260
CDC34	P49427
CDC37	Q16543
CDC37L1	Q7L3B6
CDC40	O60508
CDC42	P60953
CDC42BPA	Q5VT25
CDC42BPB	Q9Y5S2
CDC42EP1	Q00587
CDC42EP2	O14613
CDC42EP3	Q9UKI2
CDC42EP4	Q9H3Q1
CDC45	O75419
CDC5L	Q99459
CDC6	Q99741
CDC7	O00311
CDC73	Q6P1J9
CDCA2	Q69YH5
CDCA3	Q99618
CDCA4	Q9BXL8
CDCA5	Q96FF9
CDCA7	Q9BWT1
CDCA7L	Q96GN5
CDCA8	Q53HL2
CDCP1	Q9H5V8
CDH1	P12830
CDH13	P55290
CDH16	O75309
CDH18	Q13634
CDH2	P19022
CDH23	Q9H251
CDH24	Q86UP0
CDH3	P22223
CDH4	P55283
CDH5	P33151
CDH7	Q9ULB5
CDIPT	O14735
CDK1	P06493
CDK10	Q15131
CDK11A	Q9UQ88
CDK11B	P21127
CDK12	Q9NYV4
CDK13	Q14004
CDK14	O94921
CDK15	Q96Q40
CDK16	Q00536
CDK17	Q00537
CDK18	Q07002
CDK19	Q9BWU1
CDK2	P24941
CDK20	Q8IZL9
CDK2AP1	O14519
CDK2AP2	O75956
CDK3	Q00526
CDK4	P11802
CDK5	Q00535
CDK5R1	Q15078
CDK5RAP1	Q96SZ6
CDK5RAP2	Q96SN8
CDK5RAP3	Q96JB5
CDK6	Q00534
CDK7	P50613
CDK8	P49336
CDK9	P50750
CDKL1	Q00532
CDKL2	Q92772
CDKL3	Q8IVW4
CDKL5	O76039
CDKN1A	P38936
CDKN1B	P46527
CDKN1C	P49918
CDKN2A	G3XAG3
CDKN2A	P42771
CDKN2A	Q8N726
CDKN2B	P42772
CDKN2C	P42773
CDKN2D	P55273
CDKN3	Q16667
CDR2	Q01850
CDRT15	Q96T59
CDS2	O95674
CDT1	Q9H211
CDX1	P47902
CDYL	Q9Y232
CDYL2	Q8N8U2
CEACAM1	P13688
CEACAM5	P06731
CEACAM6	P40199
CEACAM7	Q14002
CEACAM8	P31997
CEBPA	P49715
CEBPB	P17676
CEBPD	P49716
CEBPE	Q15744
CEBPZ	Q03701
CEL	P19835
CELA3A	P09093
CELF1	Q92879
CELF2	O95319
CELF3	Q5SZQ8
CELSR1	Q9NYQ6
CELSR2	Q9HCU4
CELSR3	Q9NYQ7
CEND1	Q8N111
CENPA	P49450
CENPB	P07199
CENPE	Q02224
CENPF	P49454
CENPH	Q9H3R5
CENPJ	Q9HC77
CENPN	Q96H22
CENPO	Q9BU64
CENPQ	Q7L2Z9
CENPT	Q96BT3
CENPV	Q7Z7K6
CEP110	Q7Z7A1
CEP110,CP110	O43303
CEP120	Q8N960
CEP135	Q66GS9
CEP152	O94986
CEP164	Q9UPV0
CEP170	Q5SW79
CEP170L	Q96L14
CEP192	Q8TEP8
CEP250	Q9BV73
CEP290	O15078
CEP350	Q5VT06
CEP55	Q53EZ4
CEP57	Q86XR8
CEP63	Q96MT8
CEP70	Q8NHQ1
CEP72	Q9P209
CEP76	Q8TAP6
CEP78	Q5JTW2
CEP97	Q8IW35
CES1	P23141
CES3	Q6UWW8
CETN2	P41208
CETN3	O15182
CETP	P11597
CFB	P00751
CFD	P00746
CFDP1	Q9UEE9
CFH	P08603
CFHR1	Q03591
CFHR3	Q02985
CFHR4	Q92496
CFL1	P23528
CFL2	Q9Y281
CFLAR	O15519
CFTR	P13569
CGA	P01215
CGB	P01233
CGB5,CGB7,CGB8	P01233
CGGBP1	Q9UFW8
CGN	Q9P2M7
CGNL1	Q0VF96
CHAF1A	Q13111
CHAF1B	Q13112
CHCHD2	Q9Y6H1
CHCHD3	Q9NX63
CHCHD4	Q8N4Q1
CHD1L	Q86WJ1
CHD2	O14647
CHD3	Q12873
CHD4	Q14839
CHD5	Q8TDI0
CHD6	Q8TD26
CHD7	Q9P2D1
CHD8	Q9HCK8
CHD9	Q3L8U1
CHDH	Q8NE62
CHEK1	O14757
CHEK2	O96017
CHERP	Q8IWX8
CHFR	Q96EP1
CHGA	P10645
CHGB	P05060
CHI3L2	Q15782
CHIC2	Q9UKJ5
CHKA	P35790
CHL1	O00533
CHM	P24386
CHMP1A	Q9HD42
CHMP1B	Q7LBR1
CHMP2A	O43633
CHMP2B	Q9UQN3
CHMP4A	Q9BY43
CHMP4B	Q9H444
CHMP4C	Q96CF2
CHMP5	Q9NZZ3
CHMP6	Q96FZ7
CHN1	P15882
CHN2	P52757
CHORDC1	Q9UHD1
CHP	Q99653
CHP2	O43745
CHPF	Q8IZ52
CHRD	Q9H2X0
CHRDL1	Q9BU40
CHRM1	P11229
CHRM3	P20309
CHRNA4	P43681
CHST1	O43916
CHST4	Q8NCG5
CHSY1	Q86X52
CHUK	O15111
CIAO1	O76071
CIAPIN1	Q6FI81
CIB1	Q99828
CIC	Q96RK0
CIDEA	O60543
CIDEB	Q9UHD4
CIITA	P33076
CINP	Q9BW66
CIR1	Q86X95
CIRBP	Q14011
CIRH1A	Q969X6
CISD1	Q9NZ45
CISD2	Q8N5K1
CISH	Q9NSE2
CIT	O14578
CITED1	Q99966
CITED2	Q99967
CIZ1	Q9ULV3
CKAP4	Q07065
CKAP5	Q14008
CKB	P12277
CKM	P06732
CKMT1A	P12532
CKMT2	P17540
CKS1B	P61024
CKS2	P33552
CLASP1	Q7Z460
CLASP2	O75122
CLCN3	P51790
CLCN7	P51798
CLCNKB	P51801
CLDN1	O95832
CLDN12	P56749
CLDN15	P56746
CLDN16	Q9Y5I7
CLDN2	P57739
CLEC10A	Q8IUN9
CLEC16A	Q2KHT3
CLEC1B	Q9P126
CLEC3B	P05452
CLEC4F	Q8N1N0
CLEC4G	Q6UXB4
CLEC4M	Q9H2X3
CLEC7A	Q9BXN2
CLIC1	O00299
CLIC4	Q9Y696
CLIC5	Q9NZA1
CLINT1	Q14677
CLIP1	P30622
CLIP2	Q9UDT6
CLIP4	Q8N3C7
CLK1	P49759
CLK2	P49760
CLK3	P49761
CLK4	Q9HAZ1
CLN3	Q13286
CLN5	O75503
CLNK	Q7Z7G1
CLNS1A	P54105
CLOCK	O15516
CLPB	Q9H078
CLPP	Q16740
CLPX	O76031
CLSPN	Q9HAW4
CLSTN1	O94985
CLTA	P09496
CLTB	P09497
CLTC	Q00610
CLTCL1	P53675
CLU	P10909
CMAS	Q8NFW8
CMBL	Q96DG6
CMC1	Q7Z7K0
CMIP	Q8IY22
CMPK1	P30085
CMTM3	Q96MX0
CMTM5	Q96DZ9
CMTM6	Q9NX76
CMTM7	Q96FZ5
CMTM8	Q8IZV2
CMYA5	Q8N3K9
CNBP	P62633
CNDP2	Q96KP4
CNGA1	P29973
CNGB1	Q14028
CNIH4	Q9P003
CNKSR1	Q969H4
CNN1	P51911
CNN3	Q15417
CNNM3	Q8NE01
CNO	Q9NUP1
CNOT1	A5YKK6
CNOT10	Q9H9A5
CNOT2	Q9NZN8
CNOT3	O75175
CNOT4	O95628
CNOT6	Q9ULM6
CNOT6L	Q96LI5
CNOT7	Q9UIV1
CNOT8	Q9UFF9
CNP	P09543
CNPY2	Q9Y2B0
CNPY4	Q8N129
CNR2	P34972
CNST	Q6PJW8
CNTF	P26441
CNTFR	P26992
CNTN1	Q12860
CNTN3	Q9P232
CNTN4	Q8IWV2
CNTN5	O94779
CNTNAP1	P78357
CNTNAP2	Q9UHC6
CNTNAP4	Q9C0A0
CNTROB	Q8N137
COASY	Q13057
COBLL1	Q53SF7
COBRA1	Q8WX92
COCH	O43405
COG3	Q96JB2
COG4	Q9H9E3
COG5	Q9UP83
COG6	Q9Y2V7
COG7	P83436
COG8	Q96MW5
COIL	P38432
COL11A2	P13942
COL12A1	Q99715
COL15A1	P39059
COL18A1	P39060
COL1A1	P02452
COL1A2	P08123
COL20A1	Q9P218
COL23A1	Q86Y22
COL2A1	P02458
COL3A1	P02461
COL4A1	P02462
COL4A2	P08572
COL4A3BP	Q9Y5P4
COL4A4	P53420
COL4A5	P29400
COL6A1	P12109
COL6A2	P12110
COL6A3	P12111
COL8A1	P27658
COL9A2	Q14055
COL9A3	Q14050
COLQ	Q9Y215
COMMD1	Q8N668
COMMD10	Q9Y6G5
COMMD2	Q86X83
COMMD3	Q9UBI1
COMMD4	Q9H0A8
COMMD5	Q9GZQ3
COMMD6	Q7Z4G1
COMMD7	Q86VX2
COMMD8	Q9NX08
COMMD9	Q9P000
COMP	P49747
COMT	P21964
COPA	P53621
COPB1	P53618
COPB2	P35606
COPE	O14579
COPG	Q9Y678
COPG2	Q9UBF2
COPS2	P61201
COPS3	Q9UNS2
COPS4	Q9BT78
COPS5	Q92905
COPS6	Q7L5N1
COPS8	Q99627
COPZ1	P61923
COQ10A	Q96MF6
COQ6	Q9Y2Z9
CORO1A	P31146
CORO1B	Q9BR76
CORO1C	Q9ULV4
CORO2A	Q92828
CORO2B	Q9UQ03
CORO7	P57737
COTL1	Q14019
COX11	Q9Y6N1
COX15	Q7KZN9
COX17	Q14061
COX4I1	P13073
COX4NB	O43402
COX5A	P20674
COX5B	P10606
COX6A2	Q02221
COX6C	P09669
COX7A2L	O14548
COX7B	P24311
CP	P00450
CPB2	Q96IY4
CPD	O75976
CPEB1	Q9BZB8
CPEB3	Q8NE35
CPEB4	Q17RY0
CPLX1	O14810
CPLX2	Q6PUV4
CPNE1	Q99829
CPNE2	Q96FN4
CPNE3	O75131
CPNE6	O95741
CPNE7	Q9UBL6
CPNE8	Q86YQ8
CPOX	P36551
CPS1	P31327
CPSF1	Q10570
CPSF2	Q9P2I0
CPSF3	Q9UKF6
CPSF3L	Q5TA45
CPSF4	O95639
CPSF6	Q16630
CPSF7	Q8N684
CPT1A	P50416
CPVL	Q9H3G5
CPXCR1	Q8N123
CR1	P17927
CRABP1	P29762
CRADD	P78560
CRAMP1L	Q96RY5
CRAT	P43155
CRB1	P82279
CRBN	Q96SW2
CRCP	O75575
CREB1	P16220
CREB3	O43889
CREB3L1	Q96BA8
CREB3L2	Q70SY1
CREB3L3	Q68CJ9
CREB3L4	Q8TEY5
CREB5	Q02930
CREBBP	Q92793
CREBL2	O60519
CREBZF	Q9NS37
CREG1	O75629
CRELD1	Q96HD1
CRELD2	Q6UXH1
CREM	Q03060
CRHR1	P34998
CRIM1	Q9NZV1
CRIP2	P52943
CRIPAK	Q8N1N5
CRIPT	Q9P021
CRK	P46108
CRKL	P46109
CRLF3	Q8IUI8
CRMP1	Q14194
CRNKL1	Q9BZJ0
CROCC	Q5TZA2
CRP	P02741
CRTC1	Q6UUV9
CRTC2	Q53ET0
CRTC3	Q6UUV7
CRY1	Q16526
CRY2	Q49AN0
CRYAA	P02489
CRYAB	P02511
CRYBA1	P05813
CRYBA2	P53672
CRYBA4	P53673
CRYBB1	P53674
CRYBB2	P43320
CRYBB3	P26998
CRYGC	P07315
CRYGD	P07320
CRYM	Q14894
CRYZ	Q08257
CS	O75390
CSAD	Q9Y600
CSDA	P16989
CSDC2	Q9Y534
CSDE1	O75534
CSE1L	P55060
CSF1	P09603
CSF1R	P07333
CSF2	P04141
CSF2RA	P15509
CSF2RB	P32927
CSF3R	Q99062
CSK	P41240
CSMD1	Q96PZ7
CSMD2	Q7Z408
CSN1S1	P47710
CSN2	P05814
CSN3	P07498
CSNK1A1	P48729
CSNK1A1L	Q8N752
CSNK1D	P48730
CSNK1E	P49674
CSNK1G1	Q9HCP0
CSNK1G2	P78368
CSNK2A1	P68400
CSNK2A1	Q5U5J2
CSNK2A2	P19784
CSNK2B	P67870
CSRNP1	Q96S65
CSRNP3	Q8WYN3
CSRP1	P21291
[truncated: 7,429 more rows]
