# Supplementary material for: Signaling Complexity Measured by Shannon Entropy and Its Application in Personalized Medicine
Source: Front Genet. 2019 Oct 21;10:930. doi: 10.3389/fgene.2019.00930 (PMC6816034; doi:10.3389/fgene.2019.00930)
Supplement: Supplementary file 4 [file Table_4.xls]

## Sheet: Planilha1
DAYS	STAD		DAYS	LUAD		DAYS	LUSC		DAYS	LIHC		DAYS	KIRC		DAYS	KIRP		DAYS	BRCA		DAYS	THCA		DAYS	PRAD
0	100		0	100		0	100		0	100		0	100		0	100		0	100		0	100		0	100
3	99.7602		4	99.8035		1	99.7988		1	100		2	99.8131		3	100		1	100		6	100		23	100
7	99.7602		11	99.8035		2	99.5976		6	100		3	99.8131		4	100		5	100		28	100		27	100
8	99.5198		13	99.8035		3	99.3964		8	100		7	99.8131		5	100		7	100		32	100		28	100
14	99.5198		14	99.8035		4	99.3964		9	99.7268		11	99.8131		7	100		8	100		38	100		31	100
16	99.5198		15	99.8035		5	98.9931		10	99.7268		13	99.8131		13	100		9	100		51	100		38	100
17	99.2777		18	99.6055		6	98.7915		11	99.4513		16	99.8131		14	100		10	100		71	100		44	100
19	99.0349		19	99.4075		8	98.7915		12	99.1758		18	99.6233		23	100		11	100		75	100		48	100
20	99.0349		22	99.2095		9	98.5895		14	98.8995		26	99.6233		27	100		16	100		79	100		49	100
21	99.0349		24	99.2095		12	98.1855		15	98.8995		29	99.6233		29	100		19	100		81	100		54	100
22	98.7904		28	99.2095		13	98.1855		16	98.6225		36	99.6233		32	100		21	100		84	100		60	100
23	98.7904		33	99.0106		15	98.1855		19	98.3455		38	99.6233		35	100		24	100		91	100		61	100
24	98.5453		35	99.0106		17	97.9813		20	98.3455		41	99.4317		36	100		26	100		92	100		62	100
28	98.3001		36	99.0106		23	97.7772		21	98.3455		42	99.2402		62	100		30	100		95	100		67	100
29	98.3001		38	98.811		24	97.5731		22	98.3455		43	99.0486		67	100		31	100		105	100		71	100
30	98.0544		44	98.811		28	97.5731		23	98.3455		51	98.8566		73	100		34	100		122	100		83	100
31	97.808		48	98.811		30	97.5731		27	98.0645		53	98.8566		84	100		40	100		125	100		91	100
34	97.808		50	98.811		31	97.5731		30	98.0645		59	98.6643		92	100		49	100		127	100		94	100
35	97.808		58	98.6098		34	97.3663		31	97.7827		61	98.6643		112	100		51	100		129	100		97	100
45	97.5598		60	98.6098		35	97.3663		34	97.5009		62	98.4716		114	100		52	100		147	100		106	100
46	97.5598		61	98.6098		37	97.3663		36	97.2191		65	98.2789		116	100		54	100		162	100		112	100
52	97.3109		62	98.4077		41	97.3663		44	97.2191		68	98.0862		122	99.6269		59	100		174	99.7938		114	100
57	97.062		74	98.2052		42	97.3663		46	96.9365		69	97.8935		139	99.2537		64	100		175	99.7938		115	100
61	96.8131		79	98.2052		47	97.1578		52	96.6539		73	97.7008		161	99.2537		70	100		176	99.7938		128	100
64	96.8131		84	98.2052		52	96.9494		56	96.0887		77	97.5081		183	99.2537		72	100		183	99.7938		130	100
67	96.5636		87	98.0015		53	96.7409		65	95.5234		93	97.3154		201	98.8778		76	100		184	99.7938		131	100
76	96.3141		91	97.7977		55	96.7409		67	95.2408		99	97.1227		205	98.8778		78	100		215	99.7938		132	100
77	96.3141		97	97.594		59	96.5319		79	95.2408		101	96.93		214	98.8778		79	100		223	99.7938		134	100
81	95.8138		99	97.3902		60	96.5319		87	94.9574		106	96.7373		218	98.8778		80	100		233	99.585		138	100
82	95.5636		116	97.1865		61	96.3225		91	94.3905		109	96.5446		232	98.8778		84	100		238	99.585		145	100
92	95.5636		118	96.9828		70	96.3225		94	94.3905		110	96.3518		233	98.8778		90	100		243	99.3758		146	99.7831
99	95.5636		119	96.779		80	96.1094		97	94.1061		118	96.3518		238	98.8778		92	100		250	99.3758		148	99.7831
101	95.5636		121	96.5748		82	96.1094		101	93.8218		119	96.3518		241	98.4915		98	100		253	99.3758		150	99.7831
103	95.3114		124	96.3707		83	96.1094		102	93.5375		127	96.3518		252	98.4915		116	99.9024		254	99.3758		173	99.7831
105	94.8072		129	96.3707		84	95.8954		103	93.2532		137	96.158		258	98.1038		118	99.9024		256	99.3758		178	99.7831
106	94.555		131	96.3707		85	95.6813		107	92.9689		139	95.7703		270	97.716		134	99.9024		265	99.3758		183	99.7831
113	94.3029		133	96.3707		88	95.4673		115	92.6846		141	95.7703		293	97.3282		149	99.9024		267	99.3758		185	99.7831
122	94.05		134	96.3707		89	95.2532		129	92.116		150	95.7703		307	97.3282		158	99.8046		281	99.3758		189	99.7831
124	93.543		139	96.1647		92	95.0387		137	92.116		155	95.7703		309	97.3282		160	99.7067		289	99.3758		191	99.7831
131	93.543		141	96.1647		94	94.8241		140	91.8308		162	95.5752		321	96.9374		162	99.7067		292	99.3758		196	99.7831
132	93.2888		151	96.1647		97	94.8241		141	91.8308		164	95.3801		325	96.5465		163	99.7067		303	99.3758		197	99.7831
138	93.0346		154	95.9575		103	94.8241		153	91.5447		166	95.1851		329	96.1556		170	99.7067		307	99.3758		202	99.7831
140	92.7805		161	95.7502		105	94.8241		170	91.5447		168	94.9896		336	95.7647		172	99.6084		318	99.3758		212	99.7831
141	92.5263		164	95.543		106	94.8241		171	90.9708		175	94.9896		341	95.7647		174	99.51		324	99.3758		213	99.7831
153	92.2721		165	95.543		109	94.6072		180	90.9708		177	94.9896		343	95.3723		178	99.51		325	99.3758		230	99.7831
156	92.0179		167	95.3353		111	94.6072		183	90.9708		182	94.7934		347	95.3723		186	99.51		331	99.3758		250	99.7831
164	92.0179		171	95.1276		113	94.3892		194	90.682		183	94.5967		352	95.3723		187	99.51		335	99.3758		263	99.7831
166	91.7623		173	94.9199		116	94.1712		195	90.3932		193	94.5967		360	95.3723		196	99.51		337	99.3758		266	99.7831
168	91.5067		174	94.9199		121	94.1712		211	90.3932		194	94.5967		361	95.3723		197	99.4112		342	99.3758		269	99.7831
169	91.5067		176	94.7117		122	94.1712		214	90.1034		202	94.3992		363	94.9732		200	99.4112		344	99.3758		270	99.7831
170	91.5067		179	94.5036		123	93.7301		217	89.8137		204	94.2017		364	94.9732		210	99.4112		345	99.3758		273	99.7831
174	91.2496		182	94.5036		128	93.7301		219	89.8137		205	94.2017		369	94.9732		213	99.4112		346	99.3758		275	99.7831
176	91.2496		184	94.5036		131	93.509		223	89.5231		206	94.0034		373	94.9732		214	99.4112		352	99.3758		282	99.7831
180	90.7341		186	94.5036		135	93.509		229	89.5231		211	93.8047		374	94.9732		215	99.4112		356	99.3758		290	99.7831
183	90.7341		187	94.2931		136	93.2875		233	89.2315		222	93.6055		376	94.9732		216	99.4112		367	99.3758		299	99.7831
185	90.2171		189	94.0826		138	93.0659		247	88.9399		224	93.4064		377	94.9732		217	99.4112		374	99.3758		304	99.7831
188	89.9586		193	93.8722		143	92.8443		248	88.9399		238	93.2072		378	94.9732		218	99.4112		378	99.3758		308	99.7831
189	89.9586		202	93.8722		146	92.6227		250	88.9399		242	93.008		379	94.9732		222	99.4112		379	99.3758		321	99.7831
191	89.6986		210	93.6612		150	92.6227		260	88.9399		245	92.8089		380	94.9732		224	99.3114		381	99.3758		323	99.7831
192	89.4386		218	93.6612		151	92.4006		262	88.3509		256	92.8089		388	94.9732		225	99.3114		385	99.3758		328	99.7831
196	89.4386		224	93.6612		153	92.1785		272	88.0564		293	92.8089		390	94.9732		227	99.2116		389	99.3758		329	99.7831
198	89.4386		225	93.6612		160	92.1785		278	87.7618		307	92.6089		392	94.9732		231	99.2116		390	99.3758		349	99.7831
200	88.914		230	93.6612		161	91.9553		279	87.4673		311	92.4088		393	94.9732		239	99.1114		392	99.3758		350	99.7831
201	88.3863		237	93.4483		166	91.5089		283	87.1728		313	92.0088		395	94.5473		242	99.1114		400	99.3758		352	99.7831
205	88.1225		243	93.2355		173	91.5089		291	87.1728		319	92.0088		398	94.5473		243	99.1114		401	99.3758		353	99.7831
212	87.5948		244	92.8097		180	91.2851		296	86.8773		320	91.8084		403	94.5473		250	99.1114		411	99.3758		355	99.7831
215	87.331		250	92.5969		188	91.0614		299	86.5818		323	91.8084		404	94.5473		252	99.1114		415	99.3758		365	99.7831
217	87.0671		256	92.5969		195	90.8377		300	85.9908		329	91.6075		414	94.5473		255	99.0108		416	99.3758		370	99.7831
218	86.8033		257	92.3835		198	90.3902		303	85.6953		330	91.4066		419	94.5473		258	99.0108		419	99.3758		371	99.7831
224	86.8033		258	92.1702		202	90.3902		304	85.3988		333	91.2057		428	94.5473		259	99.0108		420	99.3758		376	99.7831
225	86.8033		260	91.9568		207	90.3902		308	85.1023		334	91.0048		436	94.5473		266	98.91		423	99.3758		378	99.7831
226	86.5379		264	91.9568		211	90.1653		314	85.1023		336	90.8039		445	94.5473		271	98.91		424	99.3758		384	99.7831
229	86.2724		268	91.7424		212	89.9399		315	84.8047		340	90.8039		452	94.5473		273	98.91		427	99.3758		386	99.7831
235	86.0061		274	91.5281		215	89.7145		322	84.8047		342	90.6025		471	94.1013		274	98.91		430	99.3758		393	99.7831
243	85.4736		275	91.3137		223	89.4891		327	84.8047		344	90.4012		475	94.1013		275	98.91		433	99.3758		395	99.7831
245	85.2065		281	91.0994		227	89.4891		328	84.8047		354	90.4012		479	94.1013		285	98.91		434	99.3758		396	99.7831
250	84.9385		282	90.885		236	89.2631		330	84.8047		355	90.4012		484	94.1013		287	98.91		441	99.3758		400	99.7831
255	84.6706		285	90.885		238	89.2631		341	84.8047		356	90.4012		487	93.6467		288	98.91		442	99.3758		404	99.7831
259	84.4026		287	90.885		242	89.2631		344	84.5019		362	90.1985		492	93.1921		293	98.91		444	99.3758		405	99.7831
262	84.1347		291	90.6697		244	89.2631		345	84.5019		365	90.1985		496	92.7376		295	98.808		447	99.3758		410	99.7831
272	83.8667		300	90.4543		247	89.2631		347	84.1979		369	90.1985		497	92.7376		297	98.808		448	99.3758		412	99.7831
273	83.5988		303	90.2389		261	89.0342		349	83.8928		370	90.1985		506	92.7376		300	98.808		455	99.3758		417	99.7831
274	83.3291		307	90.0236		266	88.8054		354	83.8928		372	90.1985		510	92.7376		302	98.7058		457	99.3758		422	99.7831
275	83.0595		308	89.8077		274	88.5765		357	83.8928		373	90.1985		511	92.7376		303	98.7058		458	99.3758		425	99.7831
276	82.7898		310	89.8077		276	88.3476		359	83.5855		374	90.1985		514	92.2692		304	98.6033		460	99.3758		427	99.7831
279	82.5201		321	89.3749		284	88.1187		361	83.5855		375	89.9921		516	92.2692		307	98.6033		461	99.3758		432	99.7831
280	82.5201		323	89.3749		289	88.1187		363	83.5855		385	89.9921		524	92.2692		313	98.6033		470	99.3758		440	99.7831
281	82.2487		336	88.941		291	87.8892		365	83.2725		386	89.9921		532	92.2692		317	98.6033		477	99.3758		442	99.7831
282	81.9772		337	88.941		294	87.6598		366	82.9582		400	89.9921		536	92.2692		320	98.4999		479	99.3758		448	99.7831
284	81.4343		339	88.7236		296	87.6598		372	82.9582		406	89.9921		540	92.2692		322	98.3963		481	99.3758		449	99.7831
287	81.4343		340	88.5061		299	87.4297		373	82.6416		408	89.9921		546	92.2692		323	98.3963		486	99.3758		451	99.7831
288	81.4343		343	88.2886		302	87.1996		381	82.325		411	89.9921		547	92.2692		326	98.3963		487	99.3758		455	99.7831
289	81.1611		351	88.2886		306	86.9695		382	82.325		431	89.7828		548	92.2692		328	98.3963		491	99.3758		458	99.7831
291	80.8878		353	88.2886		307	86.7395		387	82.325		433	89.7828		549	92.2692		332	98.3963		492	99.3758		463	99.7831
292	80.6145		354	88.0701		311	86.5094		390	82.325		435	89.7828		554	92.2692		334	98.3963		495	99.3758		469	99.7831
294	80.3413		365	88.0701		315	86.2793		394	82.0034		445	89.5721		560	92.2692		336	98.2919		497	99.3758		473	99.7831
296	80.068		370	87.8505		322	86.0492		395	82.0034		446	89.3613		567	92.2692		337	98.2919		499	99.3758		474	99.7831
300	79.5214		372	87.8505		324	86.0492		396	82.0034		454	89.1505		578	92.2692		339	98.2919		504	99.3758		476	99.7831
312	79.2482		375	87.6303		329	85.8185		399	82.0034		459	88.9393		582	92.2692		343	98.2919		509	99.3758		481	99.7831
323	79.2482		376	87.4101		340	85.3571		400	82.0034		468	88.9393		585	92.2692		345	98.2919		514	99.3758		483	99.7831
325	79.2482		377	87.4101		345	84.8957		406	82.0034		469	88.9393		586	92.2692		347	98.2919		517	99.3758		486	99.7831
335	79.2482		385	87.1894		351	84.665		408	82.0034		475	88.727		589	91.7537		348	98.1867		519	99.3758		493	99.7831
336	78.972		408	87.1894		353	84.665		409	82.0034		478	88.5148		597	91.2382		350	98.1867		524	99.3758		496	99.7831
337	78.972		409	86.967		357	84.4337		410	81.67		480	87.878		600	91.2382		352	98.1867		526	99.3758		508	99.7831
341	78.695		411	86.967		358	83.9711		412	81.3367		485	87.6657		608	91.2382		358	98.1867		528	99.3758		512	99.7831
342	78.4179		414	86.7434		360	83.7385		415	81.002		495	87.6657		612	91.2382		360	98.1867		529	99.3758		516	99.7831
344	78.1398		415	86.7434		365	83.5059		416	80.6659		498	87.6657		616	91.2382		362	98.0807		531	99.3758		522	99.7831
346	78.1398		416	86.7434		366	83.2733		419	80.3298		501	87.6657		618	91.2382		363	98.0807		532	99.3758		524	99.7831
348	77.5776		417	86.7434		367	83.2733		423	80.3298		505	87.6657		624	90.6984		364	98.0807		533	99.117		526	99.7831
353	77.2965		418	86.7434		370	83.2733		425	79.9922		507	87.6657		627	90.6984		365	97.9744		534	99.117		530	99.7831
354	77.0155		422	86.7434		371	83.0387		427	79.9922		510	87.4508		641	90.6984		366	97.9744		535	99.117		531	99.7831
356	76.7344		423	86.7434		372	82.8041		430	79.9922		511	87.4508		649	90.6984		368	97.9744		542	99.117		540	99.7831
358	76.4512		424	86.7434		375	82.8041		432	79.6504		519	87.4508		650	90.6984		370	97.9744		544	99.117		543	99.7831
359	76.167		426	86.7434		377	82.8041		436	79.6504		523	87.4508		657	90.6984		371	97.9744		549	99.117		546	99.7831
365	76.167		427	86.7434		378	82.8041		438	79.3071		528	87.4508		658	90.1419		373	97.9744		550	99.117		547	99.7831
366	75.8817		428	86.5127		383	82.3309		444	79.3071		551	87.4508		659	90.1419		375	97.9744		553	99.117		551	99.7831
367	75.8817		429	86.282		387	82.0944		447	79.3071		552	87.2333		665	90.1419		376	97.9744		559	99.117		553	99.7831
368	75.8817		434	85.8206		392	82.0944		449	79.3071		561	86.7982		671	90.1419		377	97.8658		563	99.117		560	99.7831
370	75.5932		435	85.8206		396	82.0944		452	78.9592		562	86.5807		677	90.1419		379	97.8658		564	99.117		573	99.7831
371	75.5932		440	85.8206		397	81.8564		453	78.9592		563	86.3631		684	90.1419		380	97.8658		565	99.117		579	99.7831
374	75.5932		442	85.5874		399	81.6184		458	78.9592		567	86.3631		697	89.5641		381	97.8658		566	99.117		583	99.7831
375	75.5932		444	85.1197		401	81.6184		468	78.9592		571	86.1445		702	89.5641		382	97.8658		567	99.117		587	99.7831
376	75.2991		446	85.1197		402	81.3798		469	78.6067		572	85.9258		708	89.5641		383	97.8658		573	99.117		589	99.7831
377	75.0049		448	85.1197		403	81.1411		472	78.6067		574	85.7072		709	89.5641		385	97.6466		574	99.117		595	99.7831
378	74.7097		455	85.1197		405	81.1411		474	78.6067		578	85.488		729	89.5641		392	97.6466		577	99.117		598	99.7831
379	74.7097		457	84.8833		406	81.1411		476	78.6067		587	85.2688		740	89.5641		393	97.6466		579	99.117		601	99.7831
381	74.7097		460	84.6462		407	81.1411		478	78.6067		591	85.2688		744	89.5641		394	97.6466		584	99.117		607	99.7831
383	74.7097		462	84.6462		408	80.8997		480	78.6067		600	85.049		757	89.5641		395	97.6466		591	99.117		610	99.7831
384	74.7097		464	84.4084		412	80.6582		486	78.6067		603	85.049		765	89.5641		396	97.6466		592	99.117		614	99.7831
385	74.7097		466	84.4084		418	80.4167		500	78.6067		607	85.049		767	89.5641		397	97.6466		595	99.117		615	99.7831
388	74.7097		467	84.4084		420	80.4167		507	78.6067		617	85.049		768	89.5641		398	97.6466		600	99.117		616	99.7831
389	74.4022		468	83.9301		423	80.4167		512	78.6067		620	85.049		769	89.5641		402	97.6466		602	99.117		617	99.7831
390	74.4022		469	83.691		428	80.1737		519	78.6067		630	85.049		771	89.5641		403	97.6466		610	99.117		621	99.7831
392	74.4022		476	83.691		429	79.9293		520	78.6067		637	84.8264		778	89.5641		404	97.6466		615	99.117		626	99.7831
394	74.4022		477	83.691		430	79.9293		535	78.2342		645	84.6038		780	89.5641		405	97.6466		621	99.117		628	99.4947
396	74.0883		478	83.4492		432	79.9293		538	78.2342		646	84.3811		786	89.5641		408	97.6466		623	99.117		636	99.4947
398	73.773		481	83.4492		440	79.9293		547	77.8599		648	84.3811		791	89.5641		409	97.6466		626	99.117		643	99.4947
400	73.773		484	83.4492		442	79.6826		552	77.8599		656	84.3811		792	89.5641		410	97.6466		636	99.117		657	99.4947
401	73.4564		486	83.4492		445	79.4359		554	77.8599		662	84.3811		797	88.9056		411	97.6466		639	99.117		663	99.4947
403	73.1398		487	83.4492		448	79.1892		555	77.4819		665	84.3811		799	88.9056		412	97.6466		640	99.117		665	99.4947
406	72.1899		488	83.2037		454	78.9417		556	77.1002		679	84.1561		803	88.9056		413	97.6466		647	99.117		666	99.4947
408	72.1899		492	83.2037		455	78.6943		558	76.7185		683	83.9311		805	88.9056		414	97.6466		649	99.117		668	99.4947
411	72.1899		499	83.2037		456	78.446		562	76.7185		685	83.9311		823	88.9056		416	97.6466		655	99.117		671	99.4947
413	72.1899		500	82.9568		465	78.446		564	76.7185		689	83.9311		824	88.9056		417	97.6466		657	99.117		679	99.4947
416	72.1899		503	82.7099		468	78.446		566	76.7185		693	83.9311		841	88.9056		418	97.6466		658	99.117		680	99.4947
419	72.1899		505	82.7099		474	78.1962		570	76.7185		700	83.9311		842	88.9056		421	97.6466		659	99.117		682	99.4947
422	71.5366		513	82.7099		481	78.1962		574	76.7185		701	83.703		845	88.9056		423	97.6466		664	99.117		685	99.4947
426	71.21		515	82.7099		482	78.1962		575	76.7185		709	83.4749		857	88.9056		424	97.6466		670	99.117		686	99.4947
427	71.21		520	82.7099		490	77.9448		579	76.7185		714	83.4749		876	88.9056		425	97.6466		674	99.117		687	99.4947
428	70.8803		522	82.7099		491	77.9448		581	76.3231		722	83.2462		883	88.9056		426	97.5317		678	99.117		692	99.4947
431	70.8803		526	82.7099		492	77.9448		585	76.3231		727	83.0169		885	88.9056		428	97.5317		683	99.117		696	99.4947
434	70.8803		531	82.7099		493	77.9448		587	76.3231		735	82.7876		890	88.9056		430	97.5317		684	99.117		700	99.4947
436	70.5459		534	82.7099		498	77.9448		588	76.3231		737	82.7876		893	88.9056		431	97.5317		685	99.117		710	99.4947
439	70.2116		536	82.7099		501	77.69		594	76.3231		749	82.7876		896	88.9056		433	97.5317		696	99.117		717	99.4947
440	70.2116		537	82.7099		506	77.4353		596	75.9193		750	82.7876		921	88.9056		434	97.5317		697	99.117		720	99.4947
446	69.8756		539	82.7099		510	77.4353		601	75.5154		755	82.7876		924	88.9056		435	97.5317		705	99.117		721	99.4947
449	69.8756		540	82.7099		511	77.4353		602	75.5154		762	82.7876		927	88.9056		437	97.5317		706	99.117		724	99.4947
450	69.8756		541	82.7099		515	77.1781		608	75.5154		768	82.5544		930	88.9056		439	97.5317		709	99.117		726	99.4947
457	69.5365		545	82.7099		516	76.9208		612	75.1028		770	82.3212		933	88.1257		440	97.5317		713	99.117		728	99.1798
463	69.5365		546	82.7099		517	76.9208		615	75.1028		774	82.3212		934	88.1257		441	97.5317		714	99.117		731	99.1798
466	69.1956		547	82.7099		519	76.6627		621	75.1028		777	82.3212		947	88.1257		442	97.5317		715	99.117		740	99.1798
468	69.1956		550	82.4498		531	76.6627		627	74.6855		782	82.0866		949	88.1257		446	97.4142		723	99.117		742	99.1798
474	68.853		551	82.4498		532	76.4037		630	74.6855		785	82.0866		965	88.1257		447	97.4142		725	99.117		746	99.1798
476	68.5105		552	82.4498		538	76.4037		631	74.6855		788	82.0866		1006	88.1257		448	97.4142		726	99.117		747	99.1798
477	68.1662		553	82.4498		539	76.1438		632	74.6855		793	81.8508		1029	88.1257		450	97.4142		727	99.117		748	99.1798
479	68.1662		557	82.1873		543	75.8839		633	74.2612		819	81.6149		1040	88.1257		451	97.4142		728	99.117		756	99.1798
485	68.1662		561	81.9247		544	75.624		636	74.2612		822	81.379		1043	88.1257		454	97.4142		739	99.117		763	99.1798
486	68.1662		564	81.9247		550	75.3642		638	74.2612		828	81.1424		1049	88.1257		455	97.4142		744	99.117		765	99.1798
491	67.4635		565	81.9247		552	75.1043		639	73.8319		830	81.1424		1060	88.1257		456	97.4142		751	99.117		766	99.1798
494	67.4635		567	81.9247		555	75.1043		640	73.8319		834	80.9052		1070	87.2701		457	97.4142		752	99.117		769	99.1798
496	67.1084		568	81.9247		557	75.1043		643	73.4002		840	80.9052		1076	87.2701		458	97.4142		753	99.117		770	99.1798
500	67.1084		573	81.9247		559	74.8426		644	73.4002		841	80.6672		1093	87.2701		461	97.4142		754	99.117		771	99.1798
507	66.7514		574	81.6561		562	74.58		649	72.9659		845	80.4293		1110	87.2701		463	97.4142		755	99.117		775	99.1798
511	66.7514		578	81.6561		565	74.58		655	72.9659		861	80.4293		1136	86.3886		466	97.4142		764	99.117		776	99.1798
513	66.3925		582	81.3848		570	74.58		658	72.9659		866	80.1906		1141	86.3886		467	97.4142		774	99.117		781	99.1798
519	66.3925		586	81.1135		573	74.3155		660	72.5263		873	80.1906		1142	86.3886		470	97.4142		775	99.117		782	99.1798
521	66.3925		591	81.1135		576	74.3155		662	72.5263		874	80.1906		1186	86.3886		471	97.4142		780	99.117		783	99.1798
523	66.3925		592	81.1135		578	74.3155		664	72.5263		878	79.9505		1188	86.3886		472	97.4142		797	99.117		784	99.1798
525	66.3925		593	80.8404		579	74.3155		671	72.5263		883	79.7104		1194	86.3886		475	97.4142		802	99.117		787	99.1798
526	66.0237		594	80.5673		581	74.3155		672	72.5263		885	79.2302		1213	86.3886		476	97.4142		812	99.117		789	99.1798
533	65.6548		595	80.5673		585	74.3155		673	72.5263		909	79.2302		1240	86.3886		477	97.4142		813	98.7833		791	98.8378
543	65.286		596	80.5673		587	74.0453		680	72.5263		910	79.2302		1242	86.3886		480	97.4142		817	98.7833		792	98.8378
549	64.9151		598	80.2923		589	74.0453		688	72.0701		919	79.2302		1251	86.3886		482	97.4142		818	98.7833		804	98.8378
552	64.5441		599	80.2923		596	74.0453		693	71.614		927	78.9879		1257	86.3886		488	97.4142		819	98.7833		811	98.8378
554	63.7979		600	80.2923		600	74.0453		697	71.614		932	78.7456		1266	86.3886		489	97.4142		822	98.7833		821	98.8378
558	63.4249		601	80.2923		601	73.7721		698	71.614		945	78.7456		1306	85.3956		492	97.4142		823	98.7833		822	98.8378
559	63.4249		603	80.2923		604	73.4978		701	71.614		946	78.5011		1309	85.3956		495	97.4142		827	98.7833		824	98.8378
560	63.0496		605	80.2923		608	73.4978		706	71.614		951	78.5011		1314	84.391		496	97.4142		831	98.7833		825	98.8378
562	62.6743		607	80.0096		615	73.4978		711	71.1398		952	78.2558		1331	84.391		499	97.4142		835	98.7833		827	98.8378
564	62.6743		608	80.0096		616	73.4978		719	71.1398		953	78.0097		1338	84.391		501	97.4142		840	98.7833		830	98.8378
566	62.6743		609	80.0096		618	73.4978		722	71.1398		963	78.0097		1357	84.391		502	97.4142		841	98.7833		833	98.8378
570	62.2944		610	80.0096		623	73.2194		724	70.6591		967	78.0097		1364	83.3491		503	97.4142		847	98.7833		839	98.8378
572	62.2944		614	79.7207		630	73.2194		728	70.6591		970	78.0097		1444	83.3491		504	97.4142		850	98.7833		842	98.8378
573	62.2944		617	79.7207		632	72.94		729	70.6591		972	78.0097		1454	83.3491		506	97.4142		859	98.7833		844	98.8378
577	62.2944		624	79.4287		637	72.94		744	70.6591		992	77.7605		1457	83.3491		508	97.4142		865	98.7833		847	98.8378
579	62.2944		625	79.1356		639	72.94		747	70.6591		1003	77.5104		1468	82.2666		509	97.4142		881	98.7833		849	98.8378
580	62.2944		626	78.8425		640	72.94		756	70.6591		1011	77.5104		1486	82.2666		510	97.4142		885	98.7833		857	98.8378
582	62.2944		628	78.5472		641	72.94		757	70.1615		1014	77.5104		1498	81.1697		511	97.4142		892	98.7833		859	98.8378
588	61.9001		629	78.5472		642	72.94		763	70.1615		1018	77.5104		1500	80.0729		513	97.4142		902	98.7833		860	98.8378
593	61.9001		630	78.5472		645	72.6539		765	69.6603		1019	77.2571		1504	80.0729		516	97.4142		904	98.7833		863	98.8378
594	61.9001		634	78.5472		649	72.6539		768	69.1592		1034	77.0038		1508	78.9607		518	97.4142		908	98.7833		864	98.8378
595	61.9001		651	78.5472		652	72.6539		770	68.658		1043	77.0038		1516	78.9607		519	97.4142		911	98.7833		868	98.8378
600	61.9001		652	78.5472		653	72.6539		780	68.658		1045	76.7497		1533	78.9607		521	97.4142		912	98.7833		870	98.8378
607	61.4929		653	78.244		660	72.6539		782	68.658		1046	76.7497		1536	77.8164		522	97.4142		913	98.7833		873	98.8378
609	61.083		656	77.9395		666	72.6539		784	68.658		1063	76.7497		1539	77.8164		523	97.4142		916	98.7833		874	98.8378
613	61.083		657	77.9395		667	72.3621		785	68.1457		1071	76.7497		1557	76.6549		524	97.2874		917	98.7833		875	98.462
615	61.083		658	77.9395		669	72.0704		799	68.1457		1075	76.493		1562	76.6549		525	97.2874		919	98.7833		877	98.462
616	61.083		664	77.9395		671	72.0704		802	67.6294		1091	76.2363		1567	76.6549		526	97.2874		928	98.7833		882	98.462
618	60.6646		666	77.6302		678	71.7774		810	67.6294		1092	75.9796		1575	76.6549		528	97.2874		930	98.7833		889	98.462
621	60.6646		669	77.6302		683	71.7774		816	67.6294		1097	75.7221		1590	76.6549		529	97.2874		931	98.7833		899	98.462
625	60.6646		670	77.6302		684	71.4832		819	67.6294		1106	75.7221		1615	76.6549		530	97.2874		938	98.7833		906	98.462
628	60.6646		674	77.6302		687	71.189		827	67.101		1107	75.7221		1662	76.6549		531	97.2874		939	98.7833		908	98.462
633	60.2374		677	77.3159		688	71.189		829	67.101		1111	75.2034		1726	76.6549		532	97.2874		941	98.7833		910	98.462
635	59.8102		683	77.3159		692	70.8936		837	66.0359		1120	75.2034		1728	76.6549		533	97.2874		942	98.7833		922	98.462
636	59.8102		689	77.3159		699	70.8936		848	65.5034		1121	74.9432		1731	76.6549		538	97.1584		943	98.7833		923	98.462
640	59.3768		690	77.3159		700	70.8936		849	65.5034		1124	74.9432		1770	76.6549		541	97.1584		944	98.7833		924	98.462
641	58.9433		691	77.3159		708	70.5933		854	65.5034		1126	74.9432		1771	75.2861		545	97.1584		946	98.7833		928	98.462
643	58.9433		694	76.9951		716	70.2929		860	65.5034		1130	74.9432		1795	75.2861		546	97.1584		950	98.7833		930	98.462
644	58.9433		697	76.6743		717	70.2929		879	65.5034		1132	74.9432		1856	75.2861		547	97.1584		951	98.7833		934	98.462
647	58.9433		701	76.3535		734	69.9912		898	65.5034		1133	74.6774		1857	75.2861		548	97.0281		952	98.7833		937	98.462
650	58.9433		702	76.0313		740	69.6882		899	64.9338		1137	74.6774		1864	75.2861		549	97.0281		953	98.7833		938	98.462
652	58.4934		704	76.0313		741	69.6882		906	64.9338		1140	74.6774		1906	75.2861		551	97.0281		955	98.7833		939	98.462
661	58.0434		705	76.0313		757	69.6882		910	64.9338		1143	74.6774		1911	75.2861		552	97.0281		957	98.7833		941	98.462
664	58.0434		711	75.7036		758	69.6882		917	64.9338		1165	74.6774		1914	75.2861		554	97.0281		958	98.7833		942	98.462
666	58.0434		718	75.7036		759	69.6882		925	64.9338		1168	74.6774		1938	75.2861		558	96.8961		961	98.7833		943	98.462
669	57.5864		719	75.3745		762	69.6882		928	64.9338		1169	74.6774		1981	75.2861		562	96.8961		963	98.3785		956	98.462
675	57.1294		723	75.3745		765	69.6882		931	64.3381		1170	74.4039		2029	75.2861		563	96.7637		968	98.3785		958	98.462
678	57.1294		724	75.3745		769	69.6882		935	64.3381		1173	74.1304		2043	73.6131		565	96.7637		973	98.3785		964	98.462
679	57.1294		728	75.3745		770	69.3757		942	64.3381		1175	74.1304		2051	73.6131		566	96.7637		983	98.3785		967	98.462
690	57.1294		730	75.3745		790	69.3757		951	64.3381		1177	74.1304		2060	73.6131		567	96.7637		986	98.3785		972	98.462
692	57.1294		731	75.0365		803	69.0618		989	64.3381		1186	74.1304		2135	73.6131		568	96.7637		987	98.3785		973	98.462
694	57.1294		737	74.6985		804	69.0618		1005	63.7194		1191	73.8537		2167	73.6131		571	96.6305		988	98.3785		974	98.462
699	57.1294		739	74.6985		810	69.0618		1008	63.7194		1200	73.3005		2173	73.6131		572	96.6305		998	98.3785		975	98.462
712	56.6411		740	74.6985		815	69.0618		1030	63.7194		1217	73.3005		2184	73.6131		573	96.497		1005	98.3785		979	98.462
724	56.6411		741	74.6985		816	69.0618		1049	63.7194		1218	73.3005		2228	73.6131		574	96.497		1006	98.3785		983	98.462
725	56.6411		747	74.6985		818	69.0618		1066	63.7194		1230	73.0218		2269	73.6131		575	96.497		1009	98.3785		987	98.462
736	56.6411		760	74.3542		822	68.739		1067	63.7194		1238	72.7431		2294	73.6131		576	96.497		1011	97.9526		992	98.462
738	56.6411		761	74.01		826	68.0906		1085	63.7194		1266	72.7431		2298	73.6131		577	96.497		1016	97.9526		994	98.462
739	56.6411		773	74.01		827	67.7648		1088	63.0557		1270	72.4623		2331	71.3824		579	96.497		1019	97.523		1001	98.462
742	56.6411		775	74.01		833	67.7648		1091	63.0557		1274	72.4623		2392	71.3824		584	96.3613		1020	97.523		1004	98.462
752	56.6411		777	73.6592		835	67.4374		1098	63.0557		1290	72.4623		2400	71.3824		585	96.3613		1023	97.0895		1008	98.462
754	56.6411		791	73.6592		840	67.11		1115	63.0557		1291	72.4623		2429	71.3824		586	96.3613		1032	97.0895		1029	98.462
762	56.1166		800	73.3017		842	67.11		1135	62.3703		1299	72.4623		2453	71.3824		588	96.3613		1033	97.0895		1054	98.462
766	55.5922		805	73.3017		849	67.11		1145	62.3703		1307	72.4623		2460	71.3824		590	96.3613		1045	97.0895		1060	98.462
779	55.0677		806	73.3017		862	67.11		1147	61.6773		1308	72.4623		2492	71.3824		591	96.3613		1046	97.0895		1063	98.462
782	54.5433		807	72.9388		867	67.11		1149	60.9843		1314	72.4623		2582	71.3824		592	96.3613		1056	97.0895		1065	98.462
785	54.5433		808	72.5759		881	66.4423		1168	60.9843		1317	72.1736		2609	68.5271		594	96.3613		1058	97.0895		1067	98.462
792	54.0137		813	72.5759		899	66.1084		1202	60.9843		1329	72.1736		2624	65.6718		595	96.3613		1060	97.0895		1070	98.462
794	53.4842		824	72.5759		908	66.1084		1210	60.2752		1337	71.8837		2627	65.6718		596	96.3613		1068	97.0895		1073	98.462
801	52.9546		826	72.2075		910	66.1084		1219	60.2752		1343	71.5939		2639	65.6718		598	96.3613		1070	97.0895		1078	98.462
804	52.9546		827	72.2075		911	66.1084		1229	59.5576		1355	71.5939		2649	65.6718		600	96.3613		1073	97.0895		1090	98.462
805	52.4197		829	72.2075		913	66.1084		1231	59.5576		1367	71.5939		2684	62.3882		602	96.3613		1076	97.0895		1096	98.462
812	52.4197		830	72.2075		916	65.7623		1233	59.5576		1371	71.3016		2744	62.3882		606	96.3613		1077	97.0895		1098	98.462
813	52.4197		839	72.2075		921	65.4162		1241	59.5576		1373	71.3016		2765	62.3882		607	96.3613		1081	97.0895		1099	98.462
819	52.4197		842	72.2075		923	65.4162		1242	59.5576		1378	71.007		2790	62.3882		608	96.3613		1085	97.0895		1103	98.462
825	52.4197		845	72.2075		925	65.4162		1271	58.8037		1380	71.007		2816	62.3882		611	96.3613		1090	97.0895		1105	98.462
832	51.8621		852	72.2075		927	65.0663		1295	58.8037		1384	71.007		2839	62.3882		612	96.2206		1091	97.0895		1106	98.462
838	51.8621		855	71.8255		932	65.0663		1302	58.8037		1385	71.007		2941	57.9319		614	96.0793		1092	97.0895		1108	98.462
856	51.8621		862	71.8255		933	64.7146		1339	58.8037		1398	71.007		2948	57.9319		616	95.9378		1096	97.0895		1115	98.462
862	51.8621		863	71.8255		937	64.3629		1345	58.8037		1404	70.7061		3010	57.9319		618	95.9378		1098	97.0895		1118	98.462
864	51.8621		864	71.4393		942	64.3629		1351	58.8037		1411	70.7061		3015	57.9319		620	95.9378		1105	97.0895		1124	98.462
869	51.2727		866	71.4393		951	63.6517		1363	58.8037		1413	70.7061		3035	57.9319		622	95.9378		1107	97.0895		1127	98.462
874	50.6834		869	71.0489		952	63.6517		1372	57.987		1416	70.7061		3050	57.9319		624	95.9378		1108	97.0895		1133	98.462
881	50.0941		872	71.0489		958	63.2941		1386	57.1703		1417	70.4		3152	57.9319		626	95.9378		1109	97.0895		1134	98.462
882	50.0941		879	70.6564		960	63.2941		1397	56.3536		1423	70.4		3241	57.9319		627	95.9378		1123	97.0895		1136	98.462
895	50.0941		882	70.6564		962	62.9345		1423	55.5369		1432	70.0926		3368	57.9319		629	95.9378		1125	97.0895		1150	98.462
899	50.0941		888	70.6564		965	62.5749		1424	55.5369		1433	70.0926		3571	57.9319		630	95.9378		1133	97.0895		1154	98.462
900	50.0941		889	70.6564		973	62.2153		1450	55.5369		1435	70.0926		3760	57.9319		631	95.9378		1140	97.0895		1155	98.462
912	50.0941		896	69.8489		974	61.8556		1452	55.5369		1436	70.0926		3811	57.9319		635	95.9378		1145	97.0895		1156	98.462
928	50.0941		904	69.8489		979	61.8556		1490	54.6824		1450	70.0926		3950	57.9319		639	95.7924		1148	97.0895		1159	98.462
940	49.4349		905	69.4404		983	61.8556		1495	54.6824		1459	70.0926		5925	57.9319		640	95.7924		1154	97.0895		1161	98.462
942	49.4349		910	69.4404		990	61.8556		1516	54.6824		1462	70.0926					641	95.7924		1161	97.0895		1167	98.462
946	49.4349		912	69.4404		995	61.8556		1531	54.6824		1463	69.7769					643	95.7924		1176	97.0895		1171	98.462
949	49.4349		913	69.4404		1000	61.4875		1553	54.6824		1471	69.7769					644	95.7924		1181	97.0895		1177	98.462
951	49.4349		922	69.0246		1001	61.1193		1560	53.7556		1476	69.7769					646	95.7924		1182	97.0895		1184	98.462
972	49.4349		929	68.6088		1006	60.7511		1562	53.7556		1478	69.7769					647	95.7924		1189	97.0895		1185	98.462
981	49.4349		930	68.6088		1007	60.7511		1567	53.7556		1485	69.7769					648	95.7924		1213	97.0895		1195	98.462
989	49.4349		938	68.6088		1011	60.7511		1618	53.7556		1487	69.7769					651	95.7924		1215	97.0895		1198	98.462
991	49.4349		944	68.6088		1031	60.7511		1622	52.7782		1489	69.7769					652	95.7924		1217	97.0895		1215	98.462
997	49.4349		947	68.6088		1032	60.7511		1624	51.8009		1491	69.7769					655	95.7924		1223	97.0895		1218	98.462
1000	49.4349		949	68.1826		1038	60.7511		1633	51.8009		1493	69.4493					658	95.7924		1224	97.0895		1219	98.462
1002	49.4349		950	67.7538		1045	60.3714		1636	51.8009		1495	69.4493					659	95.7924		1227	97.0895		1221	98.462
1010	49.4349		952	67.325		1050	60.3714		1685	50.7852		1496	69.4493					660	95.7924		1228	97.0895		1222	98.462
1016	49.4349		976	66.8962		1052	60.3714		1694	49.7695		1498	69.4493					661	95.7924		1238	97.0895		1226	98.462
1023	49.4349		977	66.8962		1057	59.9868		1711	49.7695		1499	69.4493					662	95.7924		1246	97.0895		1237	98.462
1038	49.4349		987	66.4646		1058	59.6023		1718	49.7695		1502	69.4493					664	95.7924		1251	97.0895		1247	98.462
1043	48.5826		988	66.4646		1063	59.6023		1731	49.7695		1508	69.4493					666	95.7924		1253	97.0895		1259	98.462
1055	48.5826		993	66.4646		1067	59.2127		1769	49.7695		1516	69.4493					672	95.7924		1256	97.0895		1260	98.462
1064	48.5826		995	65.5901		1072	59.2127		1779	49.7695		1520	69.4493					675	95.7924		1257	97.0895		1261	98.462
1072	48.5826		997	65.5901		1075	58.8206		1791	48.6383		1521	69.4493					677	95.7924		1263	97.0895		1262	98.462
1083	48.5826		999	65.1499		1092	58.8206		1804	48.6383		1525	69.4493					678	95.6409		1280	97.0895		1266	98.462
1090	48.5826		1013	65.1499		1097	58.4258		1823	48.6383		1528	69.4493					679	95.6409		1282	97.0895		1272	98.462
1095	47.6483		1026	64.7067		1100	58.4258		1852	47.452		1531	69.4493					680	95.6409		1293	97.0895		1273	98.462
1100	47.6483		1036	64.7067		1106	58.4258		1855	47.452		1552	69.4493					681	95.6409		1294	97.0895		1280	98.462
1106	47.6483		1040	64.7067		1107	58.0257		1876	47.452		1559	69.4493					683	95.6409		1295	97.0895		1302	98.462
1108	47.6483		1043	64.2573		1111	58.0257		1900	47.452		1560	69.4493					694	95.6409		1313	97.0895		1306	98.462
1124	47.6483		1046	63.808		1113	58.0257		1939	47.452		1567	69.0913					698	95.6409		1319	97.0895		1328	98.462
1132	47.6483		1060	63.808		1114	57.6199		1970	47.452		1584	68.7333					701	95.6409		1326	97.0895		1329	97.8388
1133	47.6483		1071	63.808		1143	57.2141		1989	47.452		1588	68.3753					702	95.6409		1329	97.0895		1339	97.8388
1138	47.6483		1072	63.808		1150	56.8083		2015	47.452		1589	68.0173					703	95.6409		1330	97.0895		1349	97.8388
1145	47.6483		1073	63.3489		1154	56.4026		2017	47.452		1590	67.6594					706	95.6409		1337	97.0895		1355	97.8388
1153	46.5402		1079	63.3489		1160	56.4026		2028	47.452		1598	67.3014					707	95.6409		1338	97.0895		1361	97.8388
1160	46.5402		1081	62.8865		1161	55.9939		2102	47.452		1604	67.3014					709	95.6409		1343	97.0895		1363	97.8388
1184	46.5402		1097	62.8865		1176	55.9939		2116	45.8703		1608	67.3014					710	95.6409		1344	97.0895		1364	97.8388
1190	46.5402		1115	62.4207		1180	55.9939		2131	44.2886		1610	66.9395					714	95.6409		1349	97.0895		1365	97.8388
1200	46.5402		1118	62.4207		1182	55.9939		2184	44.2886		1620	66.5777					715	95.6409		1350	97.0895		1366	97.8388
1210	46.5402		1119	62.4207		1189	55.576		2202	44.2886		1621	66.5777					718	95.6409		1354	97.0895		1373	97.8388
1223	46.5402		1125	62.4207		1190	55.1581		2245	44.2886		1624	66.5777					722	95.6409		1368	97.0895		1378	97.8388
1236	46.5402		1126	62.4207		1196	55.1581		2301	44.2886		1625	65.8461					723	95.4838		1385	96.4291		1381	97.8388
1294	45.2105		1130	62.4207		1212	55.1581		2317	44.2886		1626	65.4803					724	95.4838		1398	96.4291		1383	97.8388
1297	45.2105		1135	61.933		1217	55.1581		2324	44.2886		1632	65.4803					725	95.4838		1407	96.4291		1391	97.8388
1319	45.2105		1136	61.4454		1223	55.1581		2398	44.2886		1639	65.1124					726	95.4838		1419	96.4291		1395	97.8388
1328	45.2105		1147	60.9577		1224	55.1581		2412	44.2886		1657	64.7445					727	95.4838		1436	96.4291		1396	97.8388
1367	45.2105		1148	60.9577		1244	55.1581		2415	44.2886		1661	64.3746					728	95.4838		1441	96.4291		1408	97.8388
1389	45.2105		1157	60.9577		1259	55.1581		2425	44.2886		1666	64.3746					734	95.4838		1442	96.4291		1415	97.8388
1407	43.6515		1159	60.9577		1260	55.1581		2442	44.2886		1670	64.3746					738	95.4838		1447	96.4291		1427	97.8388
1431	43.6515		1163	60.9577		1268	55.1581		2455	44.2886		1683	64.3746					742	95.4838		1455	96.4291		1434	97.8388
1484	43.6515		1167	60.4539		1280	55.1581		2456	41.336		1696	63.9981					745	95.4838		1462	96.4291		1443	97.8388
1588	43.6515		1171	59.9501		1297	55.1581		2486	38.3834		1714	63.6216					747	95.4838		1463	96.4291		1449	97.8388
1645	43.6515		1175	59.9501		1311	55.1581		2513	38.3834		1724	63.2452					748	95.4838		1466	96.4291		1457	97.8388
1646	43.6515		1178	59.9501		1315	54.6985		2532	35.1848		1729	63.2452					749	95.3228		1474	96.4291		1461	97.8388
1686	41.7536		1183	59.9501		1335	54.2388		2542	31.9862		1731	63.2452					752	95.3228		1475	96.4291		1464	97.8388
1690	41.7536		1189	59.9501		1336	54.2388		2728	31.9862		1733	63.2452					754	95.1612		1484	96.4291		1476	97.8388
1747	39.7653		1194	59.4243		1338	53.7752		2746	31.9862		1746	63.2452					755	95.1612		1488	96.4291		1477	97.8388
1765	39.7653		1197	58.8984		1344	53.3117		2752	31.9862		1755	63.2452					759	95.1612		1500	95.6873		1482	97.8388
1811	37.6724		1209	58.3725		1346	52.8481		2759	27.4167		1759	63.2452					760	95.1612		1506	95.6873		1483	97.8388
1851	37.6724		1215	57.8466		1361	52.8481		3125	22.8473		1778	63.2452					761	95.1612		1512	95.6873		1491	97.8388
1862	37.6724		1216	57.8466		1386	52.8481		3258	18.2778		1779	63.2452					762	95.1612		1514	95.6873		1513	97.8388
1918	37.6724		1229	57.3159		1423	52.3762		3308	18.2778		1782	63.2452					763	94.9966		1526	95.6873		1515	97.8388
1935	37.6724		1233	57.3159		1426	51.9044		3437	18.2778		1785	63.2452					765	94.9966		1527	95.6873		1517	97.8388
1964	37.6724		1235	56.7803		1470	51.4325		3478	18.2778		1787	63.2452					767	94.9966		1528	95.6873		1518	97.8388
1980	37.6724		1239	56.7803		1475	51.4325		3675	18.2778		1789	63.2452					769	94.9966		1532	95.6873		1519	97.8388
2032	37.6724		1246	56.7803		1485	50.9563					1790	63.2452					777	94.9966		1533	95.6873		1542	97.8388
2100	34.2477		1251	56.7803		1492	50.9563					1793	63.2452					783	94.9966		1563	95.6873		1543	97.8388
2171	34.2477		1258	56.229		1499	50.9563					1794	63.2452					785	94.8302		1575	95.6873		1559	97.8388
2197	30.4424		1265	55.6777		1505	50.9563					1834	63.2452					786	94.6636		1590	95.6873		1565	97.8388
2233	30.4424		1268	55.1265		1519	50.9563					1843	63.2452					788	94.6636		1593	95.6873		1576	97.8388
2267	30.4424		1272	55.1265		1531	50.9563					1854	63.2452					789	94.6636		1595	95.6873		1610	97.8388
2351	30.4424		1280	55.1265		1541	50.9563					1862	63.2452					791	94.6636		1596	95.6873		1611	97.8388
2405	30.4424		1285	55.1265		1602	50.9563					1871	63.2452					792	94.3285		1597	94.8552		1614	97.8388
3196	30.4424		1288	54.5581		1639	50.9563					1876	63.2452					795	94.3285		1600	94.8552		1623	97.8388
3519	30.4424		1289	54.5581		1640	50.4416					1879	63.2452					798	94.3285		1614	94.8552		1640	97.8388
3540	30.4424		1293	53.9838		1645	50.4416					1883	63.2452					803	94.3285		1623	94.8552		1690	97.8388
3720	30.4424		1301	53.9838		1655	49.9216					1885	63.2452					806	94.3285		1645	94.8552		1696	97.8388
			1305	53.9838		1656	49.4016					1886	63.2452					811	94.1594		1653	94.8552		1701	97.8388
			1324	53.9838		1679	48.8815					1888	63.2452					812	94.1594		1670	94.8552		1719	97.8388
			1333	53.9838		1682	48.8815					1889	63.2452					819	94.1594		1676	94.8552		1720	97.8388
			1351	53.9838		1690	48.8815					1893	63.2452					820	94.1594		1709	94.8552		1726	97.8388
			1357	53.3773		1695	48.3502					1905	63.2452					821	93.9895		1721	94.8552		1733	97.8388
			1367	53.3773		1713	47.8189					1906	63.2452					822	93.9895		1734	93.9518		1754	97.8388
			1369	53.3773		1723	47.8189					1912	62.3286					825	93.8192		1737	93.9518		1760	97.8388
			1379	52.7566		1731	47.8189					1913	61.8703					829	93.8192		1748	93.9518		1770	97.8388
			1400	52.7566		1736	47.2755					1924	61.8703					837	93.8192		1753	93.0216		1771	97.8388
			1421	52.1286		1743	47.2755					1928	61.8703					839	93.8192		1787	93.0216		1774	97.8388
			1429	52.1286		1784	47.2755					1929	61.8703					847	93.8192		1808	93.0216		1775	97.8388
			1431	52.1286		1824	47.2755					1935	61.8703					849	93.8192		1812	93.0216		1778	97.8388
			1432	52.1286		1834	47.2755					1946	61.8703					852	93.8192		1830	93.0216		1791	97.8388
			1442	52.1286		1841	46.7059					1952	61.8703					856	93.8192		1831	93.0216		1815	97.8388
			1454	51.4687		1845	46.7059					1955	61.8703					858	93.8192		1840	93.0216		1828	97.8388
			1474	51.4687		1852	46.7059					1964	61.3831					860	93.6464		1854	92.032		1829	97.8388
			1479	51.4687		1856	46.1147					1980	60.8959					865	93.6464		1856	92.032		1832	97.8388
			1492	50.7915		1874	45.5235					1986	60.4088					867	93.6464		1862	92.032		1842	97.8388
			1498	50.1143		1884	45.5235					1993	60.4088					875	93.6464		1895	92.032		1853	97.8388
			1499	49.437		1912	44.9245					1997	60.4088					878	93.6464		1911	92.032		1855	96.631
			1501	48.7598		1927	44.9245					2004	60.4088					879	93.4714		1922	92.032		1876	96.631
			1516	48.0826		1933	44.3174					2009	60.4088					881	93.4714		1928	92.032		1882	96.631
			1523	48.0826		1953	43.7103					2014	60.4088					883	93.296		1930	92.032		1887	96.631
			1528	47.3957		1963	43.7103					2016	60.4088					889	93.296		1973	92.032		1889	96.631
			1531	46.7088		1975	43.0947					2017	60.4088					890	93.296		1986	92.032		1890	96.631
			1559	46.7088		1984	42.479					2038	60.4088					899	93.296		1989	92.032		1909	96.631
			1600	46.0117		1992	42.479					2067	60.4088					904	93.1193		1992	92.032		1913	96.631
			1617	46.0117		1997	42.479					2080	60.4088					906	93.1193		2019	92.032		1915	96.631
			1621	46.0117		2023	42.479					2087	60.4088					907	93.1193		2031	92.032		1931	96.631
			1622	45.2927		2024	42.479					2090	59.8742					908	93.1193		2033	92.032		1932	96.631
			1632	44.5738		2026	42.479					2105	59.3396					911	93.1193		2035	92.032		1947	96.631
			1653	43.8549		2073	42.479					2128	59.3396					912	92.9413		2075	92.032		1948	96.631
			1683	43.8549		2080	42.479					2133	59.3396					915	92.9413		2116	92.032		1952	96.631
			1700	43.8549		2086	41.7939					2145	58.7952					918	92.9413		2142	92.032		1962	96.631
			1725	43.1116		2133	41.1087					2150	58.7952					921	92.7618		2162	92.032		1965	96.631
			1728	43.1116		2134	41.1087					2172	58.7952					923	92.7618		2173	92.032		1968	96.631
			1750	43.1116		2142	41.1087					2184	58.7952					926	92.7618		2211	92.032		1985	96.631
			1778	42.3417		2148	41.1087					2186	58.7952					931	92.7618		2243	92.032		2002	96.631
			1790	41.5719		2160	40.3747					2190	58.2244					942	92.7618		2294	92.032		2013	96.631
			1798	40.802		2165	40.3747					2208	58.2244					943	92.5807		2331	92.032		2028	96.631
			1830	40.0322		2167	40.3747					2217	58.2244					952	92.5807		2359	92.032		2037	96.631
			1847	40.0322		2170	39.6129					2226	58.2244					954	92.5807		2367	92.032		2048	96.631
			1864	40.0322		2224	38.8511					2227	57.6362					959	92.3977		2391	92.032		2051	96.631
			1870	40.0322		2227	38.8511					2231	57.6362					965	92.3977		2396	92.032		2052	96.631
			1893	40.0322		2271	38.8511					2241	57.0421					967	92.214		2406	92.032		2056	96.631
			1932	40.0322		2284	38.0582					2246	57.0421					968	92.214		2418	92.032		2066	96.631
			1965	40.0322		2304	37.2653					2256	56.4416					972	92.214		2424	92.032		2068	96.631
			1974	40.0322		2336	37.2653					2257	56.4416					973	92.214		2449	92.032		2073	96.631
			2027	39.1426		2378	36.4552					2259	56.4416					974	92.214		2451	92.032		2079	96.631
			2065	39.1426		2381	36.4552					2263	56.4416					975	92.214		2460	92.032		2083	96.631
			2067	39.1426		2409	35.6267					2270	56.4416					976	92.0277		2485	92.032		2089	96.631
			2109	39.1426		2419	35.6267					2271	56.4416					984	92.0277		2489	92.032		2107	96.631
			2137	39.1426		2447	35.6267					2274	56.4416					987	92.0277		2492	92.032		2115	96.631
			2161	39.1426		2471	35.6267					2283	56.4416					989	92.0277		2519	92.032		2118	96.631
			2174	38.1389		2510	35.6267					2299	55.7929					990	92.0277		2535	92.032		2136	96.631
			2199	38.1389		2542	35.6267					2343	55.1441					991	91.6521		2542	92.032		2179	96.631
			2224	38.1389		2589	35.6267					2361	55.1441					996	91.6521		2573	92.032		2198	96.631
			2248	38.1389		2625	34.6638					2372	55.1441					997	91.6521		2577	92.032		2259	96.631
			2261	38.1389		2639	33.7009					2378	55.1441					1000	91.6521		2581	92.032		2279	96.631
			2318	37.0172		2645	33.7009					2386	54.4716					1001	91.6521		2582	92.032		2304	96.631
			2360	37.0172		2680	32.7097					2392	54.4716					1004	91.4616		2590	92.032		2309	96.631
			2368	37.0172		2716	32.7097					2412	54.4716					1005	91.4616		2606	92.032		2324	96.631
			2393	35.8231		2803	31.6875					2419	53.7821					1006	91.4616		2658	92.032		2347	96.631
			2449	35.8231		2811	31.6875					2422	53.7821					1007	91.4616		2665	92.032		2366	96.631
			2488	35.8231		2820	31.6875					2423	53.7821					1009	91.2686		2689	92.032		2403	96.631
			2515	35.8231		2945	30.5949					2430	53.7821					1010	91.2686		2724	92.032		2450	96.631
			2590	35.8231		2979	29.5022					2439	53.7821					1013	91.2686		2773	92.032		2465	96.631
			2595	35.8231		3016	29.5022					2454	53.0553					1015	91.2686		2815	92.032		2469	93.6112
			2616	35.8231		3108	29.5022					2461	53.0553					1025	91.2686		2863	92.032		2499	93.6112
			2617	34.3305		3123	29.5022					2470	53.0553					1026	91.2686		2877	92.032		2505	93.6112
			2620	32.8378		3149	28.2729					2489	53.0553					1027	91.2686		2900	92.032		2522	93.6112
			2676	32.8378		3166	28.2729					2504	53.0553					1032	91.0723		2973	89.6102		2535	93.6112
			2681	31.2741		3189	28.2729					2508	53.0553					1034	90.6798		2987	89.6102		2542	93.6112
			2696	31.2741		3253	26.9266					2531	53.0553					1035	90.6798		2988	89.6102		2551	93.6112
			2823	31.2741		3376	25.5803					2552	53.0553					1039	90.6798		2997	89.6102		2572	93.6112
			2832	31.2741		3387	25.5803					2554	53.0553					1042	90.6798		3059	89.6102		2620	93.6112
			2973	31.2741		3576	25.5803					2564	52.2391					1043	90.6798		3076	89.6102		2628	93.6112
			3059	31.2741		3600	24.0755					2601	51.4228					1047	90.6798		3227	89.6102		2657	93.6112
			3094	31.2741		3636	24.0755					2609	51.4228					1048	90.48		3235	89.6102		2684	93.6112
			3169	29.0403		3644	24.0755					2630	51.4228					1051	90.48		3243	89.6102		2687	93.6112
			3261	29.0403		3724	24.0755					2660	51.4228					1059	90.48		3267	89.6102		2722	93.6112
			3305	29.0403		3747	24.0755					2688	51.4228					1062	90.48		3269	89.6102		2725	93.6112
			3361	26.4002		3838	22.0693					2701	51.4228					1063	90.48		3296	89.6102		2760	93.6112
			3635	26.4002		3850	22.0693					2718	51.4228					1066	90.48		3299	89.6102		2850	93.6112
			3674	26.4002		3924	19.8623					2722	51.4228					1072	90.2767		3305	89.6102		2870	93.6112
			3759	26.4002		4026	19.8623					2746	51.4228					1074	90.2767		3431	89.6102		3096	93.6112
			3940	26.4002		4053	19.8623					2752	50.4706					1079	90.2767		3463	89.6102		3130	93.6112
			4765	26.4002		4068	19.8623					2754	50.4706					1085	90.2767		3501	89.6102		3323	93.6112
			4961	21.1202		4261	19.8623					2764	49.5					1088	90.2767		3531	89.6102		3333	93.6112
			4992	21.1202		4570	19.8623					2782	49.5					1093	90.0715		3552	89.6102		3440	93.6112
			6732	21.1202		4601	14.8968					2789	49.5					1099	90.0715		3571	89.6102		3447	93.6112
			7062	21.1202		4694	14.8968					2799	49.5					1101	90.0715		3751	89.6102		3467	81.9098
			7248	21.1202		4765	14.8968					2830	48.4687					1102	90.0715		3941	89.6102		3479	81.9098
												2839	48.4687					1104	89.8645		4017	89.6102		3502	68.2582
												2859	48.4687					1106	89.8645		4134	89.6102		3631	68.2582
												2865	48.4687					1112	89.8645		4137	89.6102		3716	68.2582
												2868	48.4687					1119	89.8645		4228	89.6102		4264	68.2582
												2873	48.4687					1120	89.8645		4254	89.6102		4295	68.2582
												2881	48.4687					1121	89.8645		4258	89.6102		5024	68.2582
												2964	48.4687					1124	89.8645		4335	89.6102
												3037	48.4687					1127	89.654		4367	89.6102
												3074	48.4687					1132	89.654		4494	89.6102
												3146	48.4687					1133	89.654		4577	89.6102
												3205	48.4687					1138	89.654		4731	89.6102
												3222	48.4687					1139	89.654		4780	89.6102
												3229	48.4687					1140	89.654		4831	89.6102
												3267	48.4687					1141	89.654		5068	89.6102
												3271	48.4687					1142	89.4406		5150	89.6102
												3302	48.4687					1148	89.2271		5423	89.6102
												3328	48.4687					1150	89.2271
												3331	48.4687					1152	89.0121
												3341	48.4687					1156	89.0121
												3343	48.4687					1157	89.0121
												3377	48.4687					1158	89.0121
												3392	48.4687					1161	89.0121
												3409	48.4687					1162	89.0121
												3431	48.4687					1163	89.0121
												3451	48.4687					1165	89.0121
												3480	48.4687					1167	89.0121
												3498	48.4687					1174	88.7923
												3519	48.4687					1179	88.7923
												3554	45.776					1185	88.7923
												3583	45.776					1186	88.7923
												3615	42.915					1189	88.7923
												3631	42.915					1191	88.7923
												3639	42.915					1196	88.7923
												3728	42.915					1198	88.7923
												3736	42.915					1203	88.7923
												3744	42.915					1206	88.7923
												3834	42.915					1208	88.7923
												3841	42.915					1210	88.7923
												3936	42.915					1217	88.7923
												3944	42.915					1219	88.7923
												3974	42.915					1220	88.7923
												3987	42.915					1224	88.7923
												3989	42.915					1229	88.7923
												4067	42.915					1232	88.7923
												4074	42.915					1233	88.7923
												4537	42.915					1234	88.7923
																		1239	88.7923
																		1246	88.7923
																		1247	88.7923
																		1248	88.7923
																		1251	88.7923
																		1266	88.7923
																		1269	88.7923
																		1270	88.7923
																		1272	88.553
																		1275	88.3136
																		1277	88.3136
																		1285	88.3136
																		1286	88.073
																		1288	88.073
																		1291	88.073
																		1301	88.073
																		1308	88.073
																		1309	88.073
																		1318	88.073
																		1321	88.073
																		1324	87.8256
																		1325	87.8256
																		1326	87.8256
																		1330	87.8256
																		1347	87.8256
																		1351	87.8256
																		1359	87.8256
																		1363	87.8256
																		1365	87.5725
																		1369	87.5725
																		1371	87.5725
																		1388	87.3172
																		1411	87.0619
																		1417	87.0619
																		1419	87.0619
																		1430	86.8043
																		1434	86.8043
																		1437	86.8043
																		1439	86.5452
																		1448	86.5452
																		1449	86.5452
																		1461	86.5452
																		1463	86.5452
																		1467	86.5452
																		1471	86.5452
																		1474	86.5452
																		1476	86.5452
																		1477	86.5452
																		1492	86.5452
																		1505	86.5452
																		1508	86.2764
																		1516	86.2764
																		1519	86.2764
																		1522	86.2764
																		1523	86.2764
																		1528	86.2764
																		1532	86.2764
																		1534	86.2764
																		1535	86.2764
																		1542	86.0008
																		1545	86.0008
																		1546	86.0008
																		1547	86.0008
																		1548	86.0008
																		1550	86.0008
																		1556	85.7188
																		1561	85.7188
																		1563	85.4359
																		1569	85.4359
																		1572	85.4359
																		1587	85.4359
																		1596	85.4359
																		1604	85.4359
																		1611	85.4359
																		1612	85.4359
																		1613	85.4359
																		1614	85.4359
																		1616	85.4359
																		1620	85.4359
																		1631	85.4359
																		1639	85.4359
																		1640	85.4359
																		1642	85.1351
																		1644	85.1351
																		1648	85.1351
																		1649	84.831
																		1662	84.831
																		1673	84.5259
																		1682	84.5259
																		1683	84.5259
																		1686	84.5259
																		1688	84.2151
																		1692	83.9032
																		1694	83.5901
																		1699	83.2771
																		1712	83.2771
																		1728	83.2771
																		1732	83.2771
																		1742	83.2771
																		1759	82.958
																		1780	82.958
																		1781	82.6377
																		1783	82.6377
																		1793	82.3161
																		1800	82.3161
																		1812	81.9933
																		1820	81.9933
																		1836	81.9933
																		1842	81.9933
																		1847	81.9933
																		1853	81.9933
																		1855	81.9933
																		1864	81.9933
																		1866	81.9933
																		1871	81.9933
																		1873	81.9933
																		1876	81.9933
																		1882	81.9933
																		1884	81.6545
																		1887	81.6545
																		1900	81.3143
																		1914	81.3143
																		1919	81.3143
																		1920	80.9712
																		1925	80.9712
																		1926	80.9712
																		1927	80.6252
																		1928	80.6252
																		1935	80.6252
																		1953	80.6252
																		1972	80.6252
																		1980	80.6252
																		1988	80.6252
																		1993	80.2684
																		1996	80.2684
																		2009	79.9101
																		2012	79.9101
																		2019	79.9101
																		2031	79.9101
																		2033	79.9101
																		2041	79.9101
																		2048	79.9101
																		2064	79.9101
																		2072	79.9101
																		2082	79.9101
																		2091	79.9101
																		2097	79.5349
																		2108	79.5349
																		2109	79.5349
																		2124	79.5349
																		2127	79.1543
																		2128	79.1543
																		2136	79.1543
																		2140	79.1543
																		2142	79.1543
																		2155	79.1543
																		2156	79.1543
																		2161	79.1543
																		2164	79.1543
																		2184	79.1543
																		2190	79.1543
																		2191	79.1543
																		2192	78.7505
																		2193	78.7505
																		2197	78.7505
																		2207	78.3425
																		2222	78.3425
																		2231	78.3425
																		2236	78.3425
																		2240	78.3425
																		2246	78.3425
																		2248	78.3425
																		2255	78.3425
																		2263	78.3425
																		2273	77.912
																		2278	77.912
																		2281	77.912
																		2282	77.912
																		2288	77.912
																		2289	77.912
																		2296	77.4693
																		2306	77.4693
																		2311	77.4693
																		2329	77.4693
																		2330	77.4693
																		2335	77.4693
																		2348	77.0136
																		2361	76.5579
																		2362	76.5579
																		2365	76.5579
																		2371	76.5579
																		2372	76.5579
																		2373	76.0883
																		2381	76.0883
																		2385	76.0883
																		2403	76.0883
																		2406	76.0883
																		2417	75.6067
																		2426	75.6067
																		2442	75.6067
																		2469	75.1157
																		2477	75.1157
																		2483	74.6215
																		2486	74.6215
																		2489	74.6215
																		2513	74.6215
																		2515	74.6215
																		2520	74.1104
																		2534	73.5993
																		2535	73.5993
																		2541	73.5993
																		2551	73.081
																		2558	73.081
																		2559	73.081
																		2573	72.5553
																		2590	72.5553
																		2596	72.5553
																		2605	72.5553
																		2612	72.5553
																		2618	72.5553
																		2629	72.5553
																		2632	72.5553
																		2636	71.9928
																		2645	71.9928
																		2650	71.9928
																		2653	71.9928
																		2654	71.9928
																		2695	71.9928
																		2707	71.9928
																		2709	71.9928
																		2712	71.3929
																		2721	71.3929
																		2759	71.3929
																		2763	70.7827
																		2767	70.7827
																		2770	70.7827
																		2798	70.1618
																		2813	70.1618
																		2838	70.1618
																		2854	69.5297
																		2856	69.5297
																		2866	68.8918
																		2868	68.8918
																		2911	68.248
																		2920	68.248
																		2953	68.248
																		2965	66.9355
																		2971	66.9355
																		2976	66.9355
																		2989	66.9355
																		2991	66.9355
																		3001	66.9355
																		3004	66.9355
																		3009	66.9355
																		3011	66.9355
																		3015	66.9355
																		3017	66.9355
																		3021	66.9355
																		3022	66.9355
																		3030	66.9355
																		3035	66.9355
																		3063	66.1661
																		3072	66.1661
																		3088	66.1661
																		3091	66.1661
																		3094	66.1661
																		3102	66.1661
																		3112	66.1661
																		3121	66.1661
																		3126	65.3286
																		3128	65.3286
																		3152	65.3286
																		3159	65.3286
																		3172	65.3286
																		3202	65.3286
																		3203	65.3286
																		3204	65.3286
																		3226	65.3286
																		3247	65.3286
																		3248	65.3286
																		3256	65.3286
																		3261	65.3286
																		3262	64.3388
																		3276	64.3388
																		3283	64.3388
																		3286	64.3388
																		3287	64.3388
																		3296	64.3388
																		3307	64.3388
																		3316	64.3388
																		3342	64.3388
																		3361	64.3388
																		3364	64.3388
																		3409	63.1473
																		3418	61.9558
																		3430	61.9558
																		3456	61.9558
																		3461	60.7167
																		3462	59.4776
																		3472	58.2385
																		3492	56.9994
																		3506	56.9994
																		3519	56.9994
																		3603	56.9994
																		3607	56.9994
																		3660	56.9994
																		3669	55.6091
																		3709	55.6091
																		3736	54.1833
																		3807	54.1833
																		3873	52.7189
																		3926	51.2544
																		3941	49.79
																		3945	48.3256
																		3957	48.3256
																		3959	46.8154
																		4005	46.8154
																		4047	46.8154
																		4052	46.8154
																		4080	46.8154
																		4088	46.8154
																		4159	46.8154
																		4233	46.8154
																		4267	44.8648
																		4275	44.8648
																		4285	44.8648
																		4354	44.8648
																		4361	44.8648
																		4456	42.5035
																		4894	42.5035
																		4929	42.5035
																		5042	42.5035
																		5062	42.5035
																		5156	42.5035
																		5176	42.5035
																		5739	42.5035
																		6292	42.5035
																		6456	38.2531
																		6593	34.0028
																		7106	34.0028
																		7126	34.0028
																		7455	28.3357
																		7777	28.3357
																		8008	28.3357
																		8391	28.3357
																		8556	28.3357
																		8605	28.3357
