# Supplementary material for: Signaling Complexity Measured by Shannon Entropy and Its Application in Personalized Medicine
Source: Front Genet. 2019 Oct 21;10:930. doi: 10.3389/fgene.2019.00930 (PMC6816034; doi:10.3389/fgene.2019.00930)
Supplement: Supplementary file 5 [file Table_5.xls]

## Sheet: STAD
STAD
Patients	Tumor Entropy	Vital status	Days to death/Last follow-up	Survival rates
6454	2.37263	alive	0	100
A4GY	2.43596	alive	8	99.5198
5720	2.4843	dead	30	98.0544
5722	2.74	alive	30	98.0544
8238	2.42852	alive	46	97.5598
7968	2.02408	alive	77	96.3141
A4GC	2.22151	alive	99	95.5636
8663	2.47627	dead	103	95.3114
7735	2.03123	dead	106	94.555
A4G3	2.23254	alive	170	91.5067
5721	2.48734	alive	183	90.7341
5734	2.02093	dead	243	85.4736
A4GP	2.48739	alive	273	83.5988
A4GH	2.08808	alive	358	76.4512
6457	2.42222	alive	416	72.1899
AB1X	2.3039	alive	411	72.1899
6453	2.02235	alive	485	68.1662
A4HB	2.03108	dead	477	68.1662
AB1V	2.54663	alive	479	68.1662
7851	1.56257	dead	574	62.2944
8462	2.69067	alive	572	62.2944
6458	2.2002	dead	588	61.9001
7829	2.00978	alive	594	61.9001
6564	2.50828	dead	794	53.4842
A4GN	2.38761	alive	912	50.0941
6802	1.88428	alive	940	49.4349
7715	2.47137	alive	1023	49.4349
7704	2.32176	alive	1072	48.5826
7806	2.58193	alive	1106	47.6483
7716	2.31238	alive	1210	46.5402
6852	1.91712	alive	1367	45.2105

## Sheet: LIHC
LIHC
Patients	Entropy	Vital status	Days to death/Last follow-up	Survival rates
A3A8	1.47499	dead	11	99.4513
A11B	1.37818	dead	14	98.8995
A10Z	1.88218	dead	34	97.5009
A11A	1.98579	alive	79	95.2408
A10W	2.52087	dead	91	94.3905
A1EI	2.32079	alive	183	90.9708
A3R2	1.82934	dead	194	90.682
A119	2.67579	dead	223	89.5231
A3A1	1.9586	dead	233	89.2315
A3I1	2.52943	dead	247	88.9399
A10R	2.00074	dead	308	85.1023
A1EE	2.4904	dead	349	83.8928
A3RK	2.38978	alive	363	83.5855
A1EL	2.85211	dead	415	81.002
A2HT	2.50077	dead	438	79.3071
A3A3	2.52321	dead	535	78.2342
A12J	1.61656	alive	570	76.7185
A1EC	2.01949	alive	602	75.5154
A26S	1.6802	alive	608	75.5154
A39Z	2.18983	dead	601	75.5154
A3A4	1.97209	dead	612	75.1028
A39V	2.68547	dead	643	73.4002
A11C	2.07506	alive	662	72.5263
A10Y	1.32532	dead	711	71.1398
A10X	2.36641	dead	770	68.658
A3CH	2.0003	alive	780	68.658
A39W	1.86544	dead	827	67.101
A10T	1.96947	dead	837	66.0359
A10U	1.90464	dead	837	66.0359
A3I0	2.71869	alive	848	65.5034
A1EJ	2.10475	dead	1005	63.7194
A10Q	2.70776	dead	1135	62.3703
A114	2.42637	dead	1149	60.9843
A216	1.75822	alive	1351	58.8037
A2L6	1.88384	alive	1363	58.8037
A1EG	2.6566	dead	1372	57.987
A1EH	2.36699	alive	1495	54.6824
A11D	2.02634	dead	1560	53.7556
A116	2.39601	dead	1622	52.7782
A39X	2.55048	dead	1694	49.7695
A1EB	2.15518	alive	2017	47.452
A23B	1.98139	dead	1852	47.452
A110	2.11109	dead	2116	45.8703
A113	2.29898	alive	2425	44.2886
A3A2	1.69707	dead	2131	44.2886
A3A5	2.26706	dead	3125	22.8473
A118	1.185	alive	3437	18.2778
A3A6	2.49958	dead	3258	18.2778

## Sheet: KIRC
KIRC
Patients	Entropy	Vital status	Days to death/Last follow-up	Survival rates
6087	2.69204	dead	41	99.4317
5468	2.44249	dead	59	98.6643
5467	2.18141	dead	73	97.7008
5584	2.11244	dead	164	95.3801
4865	2.32943	dead	166	95.1851
5549	2.27731	alive	194	94.5967
6033	2.54638	dead	224	93.4064
5462	2.17415	dead	311	92.4088
5461	2.24402	dead	330	91.4066
5986	2.54411	alive	373	90.1985
5470	2.38479	alive	386	89.9921
5987	1.93994	dead	445	89.5721
5694	2.29542	dead	480	87.878
4619	2.3734	alive	523	87.4508
5681	2.01393	dead	552	87.2333
5455	2.2182	dead	561	86.7982
5678	2.36755	dead	574	85.7072
3387	2.58136	alive	617	85.049
5463	2.17661	alive	662	84.3811
5641	2.37024	alive	656	84.3811
5679	2.2505	dead	679	84.1561
5466	2.41861	alive	685	83.9311
5988	2.66568	alive	693	83.9311
5454	2.44458	dead	722	83.2462
5680	1.9489	dead	768	82.5544
4620	2.18104	alive	777	82.3212
5677	2.49001	dead	782	82.0866
5636	2.45921	alive	919	79.2302
5469	2.54344	dead	946	78.5011
3358	1.73272	alive	1307	72.4623
5402	2.2023	alive	1290	72.4623
4712	2.54773	dead	1337	71.8837
4622	2.09383	alive	1525	69.4493
5689	2.22767	dead	1620	66.5777
5452	2.23949	alive	1789	63.2452
5989	2.38283	alive	1905	63.2452
4863	2.18584	alive	1928	61.8703
5451	2.49555	alive	1929	61.8703
5580	2.44371	dead	1964	61.3831
4700	2.41996	dead	1980	60.8959
5984	2.41838	alive	2067	60.4088
5985	2.34647	alive	1997	60.4088
5587	2.42064	alive	2226	58.2244
5672	2.25449	dead	2190	58.2244
5703	2.36225	alive	2246	57.0421
5591	1.92198	alive	2271	56.4416
6030	2.36821	dead	2299	55.7929
5589	2.41753	alive	2378	55.1441
5453	2.4362	dead	2419	53.7821
5456	2.35226	alive	2422	53.7821
5982	2.87893	alive	2439	53.7821
5701	2.05773	alive	2461	53.0553
6090	2.71287	alive	2552	53.0553
5465	2.63924	dead	2564	52.2391
5585	2.18077	alive	2609	51.4228
5696	2.51013	alive	2609	51.4228
5697	2.39194	alive	2630	51.4228
5712	1.91533	alive	2722	51.4228
5457	2.20939	alive	2754	50.4706
5458	2.16063	alive	2789	49.5
5581	2.57865	alive	2799	49.5
4864	1.96027	dead	2830	48.4687
5690	2.49342	alive	3392	48.4687
5691	2.32924	alive	3431	48.4687
5706	2.38158	alive	3205	48.4687
6088	2.2789	alive	3222	48.4687
5699	2.34064	alive	3841	42.915
5705	2.20352	alive	4537	42.915
5709	2.51738	alive	3974	42.915
5711	2.49897	alive	3989	42.915

## Sheet: KIRP
KIRP
Patients	Entropy	Vital status	Days to death/Last follow-up	Survival rates
5891	2.74335	alive	29	100
5894	2.70242	alive	84	100
7966	2.64816	alive	112	100
5890	2.52085	alive	233	98.8778
7059	2.43952	alive	232	98.8778
7061	2.03419	alive	218	98.8778
A57E	2.07747	dead	258	98.1038
5877	2.49212	dead	270	97.716
A59R	2.14165	alive	378	94.9732
5888	2.03983	alive	403	94.5473
A9DE	2.03811	alive	496	92.7376
A4ZT	1.93341	alive	516	92.2692
5882	2.22952	dead	658	90.1419
5879	2.59964	dead	697	89.5641
5884	2.23536	alive	792	89.5641
5887	2.3524	alive	771	89.5641
A8RY	1.89794	alive	769	89.5641
4115	2.22959	alive	803	88.9056
7055	2.14491	alive	799	88.9056
A5E8	2.35935	dead	1306	85.3956
7045	2.37213	dead	1468	82.2666
7051	2.19216	alive	1533	78.9607
6133	2.29624	dead	1557	76.6549
5878	2.46371	alive	1938	75.2861
6134	1.97591	alive	1856	75.2861
6131	2.2719	alive	2429	71.3824
6132	1.96241	alive	2460	71.3824
5875	2.15007	alive	2639	65.6718
A5ED	1.93073	alive	2816	62.3882
6846	2.17701	alive	5925	57.9319
7044	2.44594	alive	3760	57.9319
7046	2.38544	alive	2948	57.9319

## Sheet: BRCA
BRCA
Patients	Entropy	Vital status	Days to death/Last follow-up	Survival rates
A0DQ	2.39453	alive	98	100
A1RD	2.16389	alive	34	100
A0E0	2.14829	alive	134	99.9024
A0HK	2.11934	alive	178	99.51
A23H	2.66903	dead	174	99.51
A1RF	2.67588	alive	200	99.4112
A2C8	2.26079	alive	225	99.3114
A15M	2.48637	dead	336	98.2919
A1EV	2.37978	dead	365	97.9744
A0DK	2.60102	alive	423	97.6466
A0DP	1.99995	alive	476	97.4142
A0E1	2.07447	alive	477	97.4142
A158	2.28542	alive	450	97.4142
A18J	2.41215	dead	612	96.2206
A0BJ	1.82362	alive	660	95.7924
A0H7	2.2316	alive	702	95.6409
A13G	2.40069	alive	718	95.6409
A153	2.27533	alive	707	95.6409
A1N6	2.42168	dead	678	95.6409
A0AY	2.26661	alive	777	94.9966
A1NG	2.27763	dead	786	94.6636
A18L	2.499	dead	811	94.1594
A0DC	2.36937	alive	906	93.1193
A18P	2.49281	dead	921	92.7618
A1F2	2.55108	dead	959	92.3977
A0BC	1.91231	alive	974	92.214
A1RB	2.58668	dead	976	92.0277
A1N4	2.1399	alive	1000	91.6521
A0DB	2.46418	alive	1007	91.4616
A1NF	2.51948	dead	1072	90.2767
A1N9	2.65163	alive	1101	90.0715
A1N5	2.07731	alive	1120	89.8645
A1NA	2.5031	alive	1112	89.8645
A0D9	2.29275	alive	1139	89.654
A18R	2.74922	dead	1142	89.4406
A18N	2.27252	dead	1148	89.2271
A0DH	1.9751	alive	1156	89.0121
A0C0	2.22646	alive	1270	88.7923
A1ND	2.47874	alive	1266	88.7923
A1RC	2.445	alive	1224	88.7923
A203	2.384	dead	1174	88.7923
A2FB	2.14708	alive	1234	88.7923
A1EU	1.79204	dead	1286	88.073
A1RH	2.6582	alive	1417	87.0619
A1R7	2.61502	alive	1467	86.5452
A1RI	2.07857	alive	1449	86.5452
A0BV	2.2711	alive	1519	86.2764
A18V	2.59815	dead	1556	85.7188
A0B8	2.05576	alive	1569	85.4359
A0H5	1.94695	alive	1620	85.4359
A0HA	2.0849	alive	1611	85.4359
A18U	2.53163	dead	1563	85.4359
A1LS	2.40004	alive	1604	85.4359
A15I	1.88821	alive	1692	83.9032
A18Q	2.45445	dead	1692	83.9032
A208	2.22589	dead	1759	82.958
A0BM	1.5296	alive	1876	81.9933
A0AZ	2.05053	alive	1919	81.3143
A0DG	2.00891	alive	2041	79.9101
A18S	1.91295	dead	2009	79.9101
A0B5	2.0619	alive	2136	79.1543
A1EN	2.32403	dead	2127	79.1543
A1IG	2.16988	alive	2140	79.1543
A1FN	2.62158	dead	2192	78.7505
A0BQ	2.10432	alive	2255	78.3425
A0BZ	2.41811	alive	2255	78.3425
A18M	2.47266	dead	2207	78.3425
A1LB	1.98351	alive	2306	77.4693
A0BT	2.07124	alive	2365	76.5579
A0BW	2.33531	alive	2371	76.5579
A0DL	2.35501	alive	2381	76.0883
A0DT	1.91253	alive	2403	76.0883
A0DD	2.48624	alive	2486	74.6215
A204	2.56342	dead	2534	73.5993
A0B7	2.35151	alive	2559	73.081
A0BS	2.17529	alive	2612	72.5553
A0C3	1.82171	alive	2709	71.9928
A2FF	1.79	alive	2759	71.3929
A1EO	2.31662	dead	2798	70.1618
A1LH	2.25545	alive	3247	65.3286
A1FC	2.6534	dead	3472	58.2385

## Sheet: THCA
THCA
Patients	Entropy	Vital status	Days to death/Last follow-up	Survival rates
A3ZS	1.91366	alive	215	99.7938
A28W	2.00653	alive	344	99.3758
A2C6	2.25038	alive	381	99.3758
A2JQ	2.1256	alive	356	99.3758
A2N8	2.0021	alive	504	99.3758
A3RI	1.99983	alive	335	99.3758
A41I	1.70818	alive	486	99.3758
A41J	2.21783	alive	477	99.3758
A1CT	1.88181	alive	553	99.117
A1CU	2.28507	alive	636	99.117
A1CW	1.94595	alive	549	99.117
A2K9	2.02693	alive	659	99.117
A2N7	2.15446	alive	559	99.117
A2N9	1.74138	alive	623	99.117
A2NA	2.00143	alive	577	99.117
A3DW	1.94371	alive	752	99.117
A3MY	2.33497	dead	533	99.117
A3PU	2.18421	alive	567	99.117
A3TY	2.30234	alive	709	99.117
A1CS	2.08808	alive	817	98.7833
A28X	2.34918	alive	942	98.7833
A290	2.15842	alive	919	98.7833
A3N2	2.16326	alive	902	98.7833
A3T2	1.60734	alive	988	98.3785
A3H2	1.49221	dead	1019	97.523
A28R	2.24565	alive	1282	97.0895
A3PR	1.94062	alive	1107	97.0895
A3ST	1.64443	alive	1182	97.0895
A3T7	2.30902	alive	1256	97.0895
A3ZM	2.45518	alive	1096	97.0895
A1CV	2.16793	alive	1475	96.4291
A3ZK	2.13053	alive	1575	95.6873
A1JZ	2.37683	alive	1670	94.8552
A3MX	2.17138	dead	1753	93.0216
A3ZR	1.93968	alive	1830	93.0216
A3ZT	2.06386	alive	1808	93.0216
A1YC	1.65817	alive	2391	92.032
A3DP	2.19776	alive	2877	92.032
A3TA	2.00098	alive	2035	92.032
A3TB	2.17249	alive	2519	92.032
A3ZG	1.76088	alive	2724	92.032
A3ZH	1.53078	alive	2773	92.032
A3ZL	1.64677	alive	1895	92.032
A3ZO	2.16251	alive	2211	92.032
A3ZP	1.93893	alive	1992	92.032
A3ZQ	2.02439	alive	1862	92.032
A3GZ	2.30798	alive	4258	89.6102
A3H7	1.93227	alive	4228	89.6102
A3MW	2.0354	alive	3305	89.6102
A3N3	2.11544	alive	5423	89.6102
A3T0	2.31072	alive	4335	89.6102
A3T1	1.92943	alive	3941	89.6102
A3T3	2.26065	alive	4017	89.6102
A3T6	1.62172	alive	2988	89.6102
A3T8	2.05621	alive	3269	89.6102
A41L	2.2249	alive	3463	89.6102

## Sheet: PRAD
PRAD
Patients	Entropy	Vital status	Days to death/Last follow-up	Survival rates
5761	1.99579	alive	28	100
5769	1.99579	alive	62	100
7793	1.65866	alive	114	100
7330	1.56982	alive	191	99.7831
7819	2.16842	alive	543	99.7831
7740	2.18914	alive	717	99.4947
7745	2.09843	alive	721	99.4947
8260	2.0158	alive	686	99.4947
8262	1.82527	alive	679	99.4947
A83J	1.88974	alive	696	99.4947
5768	2.40507	alive	731	99.1798
6384	1.7739	alive	765	99.1798
7317	2.15328	alive	771	99.1798
7331	1.64471	alive	742	99.1798
7747	2.25192	alive	748	99.1798
7752	1.80644	alive	782	99.1798
7783	1.75213	alive	787	99.1798
7784	1.94767	alive	781	99.1798
7321	2.32513	alive	824	98.8378
7328	1.92681	alive	842	98.8378
8258	1.93316	alive	847	98.8378
7211	2.15811	alive	1221	98.462
7314	1.94279	alive	1150	98.462
7315	2.13453	alive	1008	98.462
7327	2.32397	alive	923	98.462
7737	1.7921	alive	1090	98.462
7738	2.0565	alive	964	98.462
7742	2.08078	alive	938	98.462
7781	1.91753	alive	1073	98.462
7782	2.37189	alive	1167	98.462
7785	4.5375	alive	1177	98.462
7786	1.97553	alive	1096	98.462
7789	2.47556	alive	1105	98.462
7794	1.96484	alive	1306	98.462
7797	2.01193	alive	983	98.462
8259	2.08358	alive	924	98.462
6342	1.76563	alive	1696	97.8388
6348	2.39749	alive	1515	97.8388
6356	2.07449	alive	1434	97.8388
6362	1.94386	alive	1443	97.8388
6363	2.13872	alive	1378	97.8388
6365	2.21759	alive	1363	97.8388
6496	1.60837	alive	1726	97.8388
6499	2.09744	alive	1543	97.8388
7792	2.36472	alive	1396	97.8388
6333	1.70707	alive	2465	96.631
6351	1.71131	alive	2048	96.631
7115	1.62474	alive	2687	93.6112
7123	2.02464	alive	2572	93.6112
7125	2.37199	alive	2850	93.6112

## Sheet: LUAD
LUAD
Patients	Entropy	Vital status	Days to death/Last follow-up	Survival rates
6849	2.65711	alive	35	99.0106
6835	2.20484	alive	79	98.2052
2666	2.59164	dead	97	97.594
6975	2.29206	dead	118	96.9828
6978	2.87567	dead	176	94.7117
6595	2.06133	dead	189	94.0826
6979	3.07826	dead	237	93.4483
5936	2.40391	dead	257	92.3835
4676	2.40829	dead	281	91.0994
5930	2.25259	dead	282	90.885
6831	1.92355	alive	310	89.8077
6828	1.93681	alive	323	89.3749
6761	1.96331	alive	354	88.0701
4490	2.14325	dead	385	87.1894
6836	2.02116	alive	417	86.7434
5931	2.46065	dead	434	85.8206
5939	2.63591	dead	460	84.6462
6970	2.04851	dead	464	84.4084
6742	1.52576	dead	488	83.2037
6745	2.17273	alive	522	82.7099
6145	2.41667	alive	595	80.5673
5935	2.48403	dead	653	78.244
6148	2.2964	alive	704	76.0313
6146	2.40637	alive	728	75.3745
6984	2.36753	dead	760	74.3542
5645	2.39977	alive	852	72.2075
6147	2.44488	alive	845	72.2075
6847	2.25095	alive	842	72.2075
4512	2.53401	dead	905	69.4404
6777	2.13563	dead	987	66.4646
6982	2.19133	dead	995	65.5901
3396	2.61843	alive	1130	62.4207
2661	2.79992	alive	1159	60.9577
4627	2.53292	dead	1147	60.9577
6985	2.43329	alive	1233	57.3159
5932	2.52862	dead	1235	56.7803
6969	2.35188	alive	1239	56.7803
6829	2.06257	dead	1258	56.229
2662	2.60026	alive	1280	55.1265
2655	2.51278	alive	1324	53.9838
2657	2.52471	alive	1351	53.9838
2665	2.02796	alive	1301	53.9838
6968	2.83853	dead	1293	53.9838
4632	1.90519	dead	1357	53.3773
6971	2.24098	alive	1400	52.7566
6981	2.56917	dead	1379	52.7566
6743	1.97499	alive	1621	46.0117
6972	2.46372	dead	1632	44.5738
6744	2.50011	alive	1683	43.8549
6778	1.95233	alive	1864	40.0322
6980	2.10185	alive	2109	39.1426
5933	2.64433	dead	2393	35.8231
6776	2.7704	alive	2616	35.8231
4625	2.76433	alive	2973	31.2741
6983	2.57387	alive	2823	31.2741
6986	2.70279	alive	3261	29.0403
4626	2.34361	alive	3674	26.4002

## Sheet: LUSC
LUSC
Patients	Entropy	Vital status	Days to death/Last follow-up	Survival rates
3394	2.38278	dead	1190	55.1581
4079	2.42807	dead	12	98.1855
4080	2.44341	dead	12	98.1855
4081	2.01613	alive	911	66.1084
4587	3.0981	dead	1656	49.4016
4593	2.09576	dead	1067	59.2127
4609	2.12538	dead	291	87.8892
5040	2.66541	dead	519	76.6627
5471	2.59733	alive	1845	46.7059
5472	2.04789	dead	1975	43.0947
5478	2.4	dead	24	97.5731
5481	2.78987	dead	2409	35.6267
5482	2.45546	dead	357	84.4337
5483	2.65686	dead	573	74.3155
5489	2.59057	dead	1912	44.9245
5491	2.66348	dead	1713	47.8189
5670	2.2687	alive	849	67.11
6143	2.46942	alive	699	70.8936
6647	2.15544	alive	757	69.6882
6737	2.47531	dead	601	73.7721
6771	2.44732	dead	166	91.5089
6773	2.15883	dead	116	94.1712
6837	2.43672	alive	758	69.6882
7107	2.56276	dead	34	97.3663
7138	2.85444	dead	340	85.3571
7142	2.79404	alive	2227	38.8511
7222	2.52044	dead	562	74.58
7335	2.45469	dead	2133	41.1087
7337	2.89198	dead	3253	26.9266
7338	2.33558	dead	5	98.9931
7340	2.59733	alive	82	96.1094
7579	2.09535	dead	951	63.6517
7580	2.48075	alive	925	65.4162
7582	2.53944	alive	601	73.7721
7657	2.23466	alive	236	89.2631
7658	2.74669	dead	2378	36.4552
7710	2.64975	alive	42	97.3663
7730	2.17871	dead	198	90.3902
7731	2.04732	dead	3	99.3964
7767	2.74034	alive	89	95.2532
8007	2.75039	dead	198	90.3902
8008	2.22273	dead	2639	33.7009
8082	1.91053	alive	455	78.6943
8083	2.01048	alive	150	92.6227
8201	2.73372	dead	397	81.8564
8309	2.23844	alive	428	80.1737
8386	2.76944	dead	1	99.7988
8454	2.15417	alive	1180	55.9939
8623	2.48965	dead	692	70.8936
