# Supplementary material for: Signaling Complexity Measured by Shannon Entropy and Its Application in Personalized Medicine
Source: Front Genet. 2019 Oct 21;10:930. doi: 10.3389/fgene.2019.00930 (PMC6816034; doi:10.3389/fgene.2019.00930)
Supplement: Supplementary file 6 [file Table_6.xls]

## Sheet: Averages
Cancer type	5-years survival rate (%)	Up-regulated genes	Tumor Entropy	SD - Tumor
STAD	37.67	272.742	2.2808	0.266791
LUAD	40.03	283.509	2.3671	0.296549
LUSC	47.25	316.816	2.44637	0.274106
LIHC	48.63	330.854	2.14114	0.3967
KIRC	63.24	356.754	2.3311	0.211098
KIRP	75.28	319.094	2.26511	0.235803
BRCA	81.9	416.185	2.27719	0.256567
THCA	93.02	254.732	2.03961	0.232406
PRAD	97.83	431.26	2.06404	0.426551
LUAD
Survival rate interval	Tumor Entropy	Survival rate
100-81	2.28287	90.5189
80-61	2.37883	72.0925
60-41	2.40398	53.7302
40-21	2.48169	33.6012
LUSC
Survival rate interval	Tumor Entropy	Survival rate
100-81	2.44617	93.3055
80-61	2.36124	71.6947
60-41	2.45386	49.2688
40-21	2.68906	34.3121

## Sheet: Individually
STAD				LUAD				LUSC					LIHC					KIRC					KIRP					BRCA					THCA					PRAD
Patients	Up-regulated genes	Tumor Entropy		Patients	Up-regulated genes	Tumor Entropy		Patients	Up-regulated genes	Tumor Entropy			Patients	Up-regulated genes	Tumor Entropy			Patients	Up-regulated genes	Tumor Entropy			Patients	Up-regulated genes	Tumor Entropy			Patients	Up-regulated genes	Tumor Entropy			Patients	Up-regulated genes	Tumor Entropy			Patients	Up-regulated genes	Tumor Entropy
5720	236	2.4843		2655	318	2.06133		3394	341	2.38278			A10Q	366	2.70776			3358	394	1.73272			4115	342	2.22959			A0AY	642	2.26661			A1CS	200	2.08808			5761	86	1.99579
5721	204	2.2002		2657	162	1.52576		4079	341	2.42807			A10R	352	2.00074			3387	375	2.58136			5875	258	2.15007			A0AZ	444	2.05053			A1CT	201	1.88181			5768	281	2.40507
5722	275	2.50828		2661	313	1.97499		4080	377	2.44341			A10T	369	1.96947			4619	300	2.3734			5877	324	2.49212			A0B5	474	2.0619			A1CU	346	2.28507			5769	86	1.99579
5734	205	2.02093		2662	272	2.50011		4081	273	2.01613			A10U	306	1.90464			4620	365	2.18104			5878	265	2.46371			A0B7	345	2.35151			A1CV	218	2.16793			6333	271	1.70707
6453	197	1.88428		2665	260	2.17273		4587	233	3.0981			A10W	264	2.52087			4622	262	2.09383			5879	463	2.59964			A0B8	253	2.05576			A1CW	207	1.94595			6342	143	1.76563
6454	227	1.91712		2666	302	2.51278		4593	383	2.09576			A10X	223	2.36641			4700	479	2.41996			5882	292	2.22952			A0BC	256	1.91231			A1JZ	314	2.37683			6348	341	2.39749
6457	318	2.32176		3396	171	1.96331		4609	247	2.12538			A10Y	186	1.32532			4712	482	2.54773			5884	273	2.23536			A0BJ	310	1.82362			A1YC	187	1.65817			6351	193	1.71131
6458	239	2.37263		4490	262	2.53401		5040	343	2.66541			A10Z	329	1.88218			4863	258	2.18584			5887	412	2.3524			A0BM	315	1.5296			A28R	279	2.24565			6356	205	2.07449
6564	338	2.42222		4512	203	2.25259		5471	368	2.59733			A110	237	2.11109			4864	202	1.96027			5888	362	2.03983			A0BQ	379	2.10432			A28W	211	2.00653			6362	347	1.94386
6802	334	2.47137		4625	326	2.7704		5472	217	2.04789			A113	401	2.29898			4865	350	2.32943			5890	374	2.52085			A0BS	280	2.17529			A28X	228	2.34918			6363	253	2.13872
6852	268	2.31238		4626	223	2.13563		5478	261	2.4			A114	267	2.42637			5402	316	2.2023			5891	403	2.74335			A0BT	239	2.07124			A290	252	2.15842			6365	240	2.21759
7704	195	2.03123		4627	333	2.64433		5481	314	2.78987			A116	392	2.39601			5451	348	2.49555			5894	453	2.70242			A0BV	257	2.2711			A2C6	281	2.25038			6384	217	1.7739
7715	269	2.58193		4632	321	2.41667		5482	363	2.45546			A118	357	1.185			5452	373	2.23949			6131	366	2.2719			A0BW	220	2.33531			A2JQ	245	2.1256			6496	300	1.60837
7716	282	2.00978		4676	312	2.61843		5483	298	2.65686			A119	545	2.67579			5453	359	2.4362			6132	239	1.96241			A0BZ	603	2.41811			A2K9	202	2.02693			6499	243	2.09744
7735	330	2.74		5645	207	1.95233		5489	334	2.59057			A11A	337	1.98579			5454	469	2.44458			6133	288	2.29624			A0C0	673	2.22646			A2N7	207	2.15446			7115	176	1.62474
7806	212	1.56257		5930	382	2.14325		5491	387	2.66348			A11B	188	1.37818			5455	315	2.2182			6134	252	1.97591			A0C3	651	1.82171			A2N8	239	2.0021			7123	351	2.02464
7829	241	2.02408		5931	323	2.76433		5670	451	2.2687			A11C	262	2.07506			5456	428	2.35226			6846	217	2.17701			A0D9	254	2.29275			A2N9	266	1.74138			7125	227	2.37199
7851	170	2.42852		5932	315	2.48403		6143	257	2.46942			A11D	281	2.02634			5457	361	2.20939			7044	298	2.44594			A0DB	288	2.46418			A2NA	238	2.00143			7211	262	2.15811
7968	284	2.69067		5933	260	2.2964		6647	347	2.15544			A12J	222	1.61656			5458	332	2.16063			7045	384	2.37213			A0DC	339	2.36937			A3DP	365	2.19776			7314	237	1.94279
8238	266	2.47627		5935	249	2.40829		6737	298	2.47531			A1EB	297	2.15518			5461	370	2.24402			7046	270	2.38544			A0DD	510	2.48624			A3DW	269	1.94371			7315	346	2.13453
8462	293	2.23254		5936	309	2.59164		6771	438	2.44732			A1EC	319	2.01949			5462	335	2.17415			7051	263	2.19216			A0DG	395	2.00891			A3GZ	299	2.30798			7317	283	2.15328
8663	351	2.48734		5939	336	2.34361		6773	340	2.15883			A1EE	264	2.4904			5463	302	2.17661			7055	334	2.14491			A0DH	282	1.9751			A3H2	130	1.49221			7321	272	2.32513
A4G3	396	2.22151		6145	274	1.93681		6837	308	2.43672			A1EG	380	2.6566			5465	438	2.63924			7059	342	2.43952			A0DK	465	2.60102			A3H7	269	1.93227			7327	245	2.32397
A4GC	268	2.08808		6146	299	2.06257		7107	283	2.56276			A1EH	274	2.36699			5466	370	2.41861			7061	283	2.03419			A0DL	267	2.35501			A3MW	225	2.0354			7328	251	1.92681
A4GH	337	2.38761		6147	188	1.92355		7138	355	2.85444			A1EI	295	2.32079			5467	362	2.18141			7966	352	2.64816			A0DP	426	1.99995			A3MX	295	2.17138			7330	191	1.56982
A4GN	269	2.48739		6148	249	2.20484		7142	329	2.79404			A1EJ	281	2.10475			5468	394	2.44249			A4ZT	242	1.93341			A0DQ	440	2.39453			A3MY	314	2.33497			7331	218	1.64471
A4GP	386	2.43596		6595	342	2.60026		7222	301	2.52044			A1EL	438	2.85211			5469	428	2.54344			A57E	301	2.07747			A0DT	478	1.91253			A3N2	245	2.16326			7737	263	1.7921
A4GY	220	2.03108		6742	221	1.90519		7335	287	2.45469			A216	193	1.75822			5470	372	2.38479			A59R	240	2.14165			A0E0	237	2.14829			A3N3	231	2.11544			7738	342	2.0565
A4HB	265	2.02235		6743	305	2.02116		7337	404	2.89198			A23B	230	1.98139			5549	424	2.27731			A5E8	387	2.35935			A0E1	371	2.07447			A3PR	103	1.94062			7740	318	2.18914
AB1V	325	2.54663		6744	290	2.25095		7338	294	2.33558			A26S	131	1.6802			5580	412	2.44371			A5ED	380	1.93073			A0H5	460	1.94695			A3PU	318	2.18421			7742	197	2.08078
AB1X	255	2.3039		6745	263	2.65711		7340	352	2.59733			A2HT	680	2.50077			5581	375	2.57865			A8RY	260	1.89794			A0H7	415	2.2316			A3RI	258	1.99983			7745	287	2.09843
				6761	346	2.83853		7579	259	2.09535			A2L6	315	1.88384			5584	259	2.11244			A9DE	292	2.03811			A0HA	424	2.0849			A3ST	223	1.64443			7747	356	2.25192
				6776	302	2.35188		7580	344	2.48075			A39V	529	2.68547			5585	269	2.18077								A0HK	404	2.11934			A3T0	265	2.31072			7752	313	1.80644
				6777	361	2.46065		7582	371	2.53944			A39W	255	1.86544			5587	298	2.42064								A13G	268	2.40069			A3T1	236	1.92943			7781	297	1.91753
				6778	174	2.04851		7657	366	2.23466			A39X	572	2.55048			5589	349	2.41753								A153	503	2.27533			A3T2	143	1.60734			7782	237	2.37189
				6828	225	2.24098		7658	293	2.74669			A39Z	398	2.18983			5591	198	1.92198								A158	237	2.28542			A3T3	312	2.26065			7783	241	1.75213
				6829	268	2.40391		7710	343	2.64975			A3A1	222	1.9586			5636	334	2.45921								A15I	239	1.88821			A3T6	212	1.62172			7784	199	1.94767
				6831	263	2.46372		7730	281	2.17871			A3A2	248	1.69707			5641	412	2.37024								A15M	594	2.48637			A3T7	364	2.30902			7785	8972	4.5375
				6835	227	2.29206		7731	274	2.04732			A3A3	588	2.52321			5672	374	2.25449								A18J	653	2.41215			A3T8	225	2.05621			7786	268	1.97553
				6836	312	2.87567		7767	339	2.74034			A3A4	375	1.97209			5677	438	2.49001								A18L	575	2.499			A3TA	240	2.00098			7789	307	2.47556
				6847	318	3.07826		8007	277	2.75039			A3A5	369	2.26706			5678	436	2.36755								A18M	472	2.47266			A3TB	248	2.17249			7792	302	2.36472
				6849	355	2.10185		8008	319	2.22273			A3A6	585	2.49958			5679	439	2.2505								A18N	433	2.27252			A3TY	295	2.30234			7793	261	1.65866
				6968	221	2.63591		8082	222	1.91053			A3A8	243	1.47499			5680	260	1.9489								A18P	235	2.49281			A3ZG	248	1.76088			7794	263	1.96484
				6969	302	2.56917		8083	262	2.01048			A3CH	183	2.0003			5681	304	2.01393								A18Q	312	2.45445			A3ZH	167	1.53078			7797	236	2.01193
				6970	309	2.53292		8201	344	2.73372			A3I0	519	2.71869			5689	338	2.22767								A18R	374	2.74922			A3ZK	300	2.13053			7819	319	2.16842
				6971	261	2.19133		8309	308	2.23844			A3I1	298	2.52943			5690	421	2.49342								A18S	394	1.91295			A3ZL	230	1.64677			8258	300	1.93316
				6972	329	2.44488		8386	278	2.76944			A3R2	171	1.82934			5691	243	2.32924								A18U	648	2.53163			A3ZM	417	2.45518			8259	293	2.08358
				6975	297	2.52471		8454	240	2.15417			A3RK	345	2.38978			5694	336	2.29542								A18V	269	2.59815			A3ZO	303	2.16251			8260	177	2.0158
				6978	303	2.79992		8623	280	2.48965								5696	423	2.51013								A1EN	388	2.32403			A3ZP	261	1.93893			8262	261	1.82527
				6979	195	2.02796												5697	381	2.39194								A1EO	283	2.31662			A3ZQ	381	2.02439			A83J	289	1.88974
				6980	346	2.57387												5699	376	2.34064								A1EU	470	1.79204			A3ZR	203	1.93968
				6981	272	2.40637												5701	287	2.05773								A1EV	426	2.37978			A3ZS	168	1.91366
				6982	328	2.52862												5703	277	2.36225								A1F2	385	2.55108			A3ZT	295	2.06386
				6983	315	2.36753												5705	297	2.20352								A1FC	449	2.6534			A41I	250	1.70818
				6984	389	2.39977												5706	445	2.38158								A1FN	404	2.62158			A41J	340	2.21783
				6985	201	2.43329												5709	323	2.51738								A1IG	355	2.16988			A41L	297	2.2249
				6986	351	2.70279												5711	366	2.49897								A1LB	425	1.98351
																		5712	304	1.91533								A1LH	500	2.25545
																		5982	343	2.87893								A1LS	405	2.40004
																		5984	410	2.41838								A1N4	529	2.1399
																		5985	379	2.34647								A1N5	524	2.07731
																		5986	327	2.54411								A1N6	489	2.42168
																		5987	291	1.93994								A1N9	556	2.65163
																		5988	405	2.66568								A1NA	479	2.5031
																		5989	347	2.38283								A1ND	396	2.47874
																		6030	342	2.36821								A1NF	449	2.51948
																		6033	459	2.54638								A1NG	428	2.27763
																		6087	445	2.69204								A1R7	397	2.61502
																		6088	331	2.2789								A1RB	515	2.58668
																		6090	300	2.71287								A1RC	375	2.445
																												A1RD	392	2.16389
																												A1RF	431	2.67588
																												A1RH	420	2.6582
																												A1RI	311	2.07857
																												A203	552	2.384
																												A204	357	2.56342
																												A208	544	2.22589
																												A23H	493	2.66903
																												A2C8	323	2.26079
																												A2FB	570	2.14708
																												A2FF	689	1.79
