# Supplementary material for: Signaling Complexity Measured by Shannon Entropy and Its Application in Personalized Medicine
Source: Front Genet. 2019 Oct 21;10:930. doi: 10.3389/fgene.2019.00930 (PMC6816034; doi:10.3389/fgene.2019.00930)
Supplement: Supplementary file 8 [file Table_8.xls]

## Sheet: All
Target Uniprotkb	Target Genesymbol	Number of pacients	N cancer types
P08238	HSP90AB1	310	9
P02751	FN1	303	9
P63104	YWHAZ	261	9
P60709	ACTB	231	9
P35579	MYH9	206	9
P27635	RPL10	202	9
P06748	NPM1	197	9
P11021	HSPA5	184	9
P21333	FLNA	146	9
Q00839	HNRNPU	115	9
P04626	ERBB2	113	9
P07900	HSP90AA1	80	9
P67809	YBX1	78	9
P62280	RPS11	65	9
O95166	GABARAP	57	9
P05067	APP	31	9
P04792	HSPB1	129	8
Q92597	NDRG1	93	8
P46940	IQGAP1	76	8
P21860	ERBB3	63	8
P05412	JUN	52	8
P30101	PDIA3	52	8
Q71U36	TUBA1A	45	8
P01106	MYC	40	8
P62140	PPP1CB	38	8
P01023	A2M	36	8
P08670	VIM	36	8
P0CG48	UBC	26	8
P62136	PPP1CA	18	8
P19338	NCL	3	8
P51858	HDGF	85	7
P00533	EGFR	55	7
P27824	CANX	38	7
Q13501	SQSTM1	22	7
P12830	CDH1	17	7
Q8N3V7	SYNPO	45	6
P26641	EEF1G	23	6
Q16666	IFI16	23	6
Q00987	MDM2	21	6
P35222	CTNNB1	18	6
P51617	IRAK1	18	6
P43243	MATR3	15	6
Q9UHB6	LIMA1	14	6
P09651	HNRNPA1	13	6
P31946	YWHAB	13	6
Q16643	DBN1	13	6
P61981	YWHAG	12	6
P29692	EEF1D	8	6
Q13509	TUBB4	43	5
O95758	ROD1	40	5
P62993	GRB2	27	5
P33993	MCM7	22	5
P01100	FOS	15	5
P31749	AKT1	15	5
Q13547	HDAC1	14	5
O00159	MYO1C	12	5
P45973	CBX5	11	5
Q9UQ80	PA2G4	11	5
P47755	CAPZA2	10	5
P42224	STAT1	6	5
Q9H0R8	GABARAPL1	6	5
Q5S007	LRRK2	91	4
P63244	GNB2L1	25	4
P08473	MME	16	4
Q9UH99	SUN2	15	4
P61160	ACTR2	11	4
Q03518	TAP1	11	4
Q16659	MAPK6	10	4
P56945	BCAR1	8	4
P42858	HTT	6	4
Q13418	ILK	6	4
Q92614	MYO18A	6	4
P12004	PCNA	5	4
P46379	BAT3	5	4
Q9P0L0	VAPA	5	4
P00519	ABL1	4	4
P04406	GAPDH	4	4
Q04917	YWHAH	4	4
P30153	PPP2R1A	3	4
P03372	ESR1	50	3
P49755	TMED10	15	3
O00567	NOP56	10	3
Q92542	NCSTN	8	3
O75787	ATP6AP2	7	3
P46937	YAP1	6	3
Q04637	EIF4G1	6	3
P51149	RAB7A	5	3
P61769	B2M	5	3
P84022	SMAD3	5	3
P04637	TP53	4	3
P08581	MET	4	3
P36873	PPP1CC	4	3
P40763	STAT3	4	3
Q12873	CHD3	4	3
P05141	SLC25A5	3	3
P13569	CFTR	3	3
P19838	NFKB1	3	3
P27348	YWHAQ	3	3
P38606	ATP6V1A	3	3
Q92841	DDX17	3	3
P17096	HMGA1	2	3
Q13185	CBX3	2	3
Q9H6Z9	EGLN3	2	3
Q9H3D4	TP63	27	2
Q14103	HNRNPD	8	2
O15027	SEC16A	7	2
Q96CV9	OPTN	6	2
P14618	PKM2	5	2
P38919	EIF4A3	5	2
P60953	CDC42	5	2
P16104	H2AFX	4	2
P46531	NOTCH1	4	2
Q9BVK6	TMED9	4	2
O15264	MAPK13	3	2
O95793	STAU1	3	2
P29353	SHC1	3	2
Q15796	SMAD2	3	2
O00716	E2F3	2	2
P04062	GBA	2	2
P11387	TOP1	2	2
P15692	VEGFA	2	2
P21980	TGM2	2	2
P34741	SDC2	2	2
P60033	CD81	2	2
P63000	RAC1	2	2
P68104	EEF1A1	2	2
Q13131	PRKAA1	2	2
Q13162	PRDX4	2	2
Q96BA8	CREB3L1	2	2
Q9UMX0	UBQLN1	2	2
Q00610	CLTC	9	1
Q14240	EIF4A2	5	1
Q9GZQ8	MAP1LC3B	5	1
O14503	BHLHE40	4	1
Q15154	PCM1	4	1
O14879	IFIT3	3	1
P02768	ALB	3	1
P12956	XRCC6	3	1
P55209	NAP1L1	3	1
P55317	FOXA1	3	1
Q15843	NEDD8	3	1
Q92900	UPF1	3	1
Q9NR12	PDLIM7	3	1
P04083	ANXA1	2	1
P04179	SOD2	2	1
P0C0L4	C4A	2	1
P16070	CD44	2	1
P21926	CD9	2	1
P32121	ARRB2	2	1
P35555	FBN1	2	1
P62277	RPS13	2	1
Q08117	AES	2	1
Q09472	EP300	2	1
Q09666	AHNAK	2	1
Q14203	DCTN1	2	1
Q16543	CDC37	2	1
Q7KZF4	SND1	2	1
Q96RR4	CAMKK2	2	1
Q99523	SORT1	2	1
Q9GZZ9	UBA5	2	1
Q9NZI8	IGF2BP1	2	1
Q00613	HSF1	1	1
Q14192	FHL2	1	1
P21246	PTN	1	1
O15372	EIF3H	1	1
P60520	GABARAPL2	1	1
P61978	HNRNPK	1	1
P63167	DYNLL1	1	1
P83916	CBX1	1	1
Q01844	EWSR1	1	1
Q12905	ILF2	1	1
Q14204	DYNC1H1	1	1
Q14683	SMC1A	1	1
Q9BPW8	NIPSNAP1	1	1
O00560	SDCBP	1	1
O14818	PSMA7	1	1
P00441	SOD1	1	1
P00738	HP	1	1
P02647	APOA1	1	1
P02671	FGA	1	1
P02745	C1QA	1	1
P02787	TF	1	1
P04075	ALDOA	1	1
P04183	TK1	1	1
P04233	CD74	1	1
P05386	RPLP1	1	1
P05556	ITGB1	1	1
P05783	KRT18	1	1
P08575	PTPRC	1	1
P09874	PARP1	1	1
P10276	RARA	1	1
P10644	PRKAR1A	1	1
P10909	CLU	1	1
P12931	SRC	1	1
P13010	XRCC5	1	1
P14625	HSP90B1	1	1
P15336	ATF2	1	1
P15884	TCF4	1	1
P16152	CBR1	1	1
P17844	DDX5	1	1
P17861	XBP1	1	1
P17948	FLT1	1	1
P18206	VCL	1	1
P18827	SDC1	1	1
P18847	ATF3	1	1
P18848	ATF4	1	1
P24539	ATP5F1	1	1
P24863	CCNC	1	1
P25786	PSMA1	1	1
P27105	STOM	1	1
P28300	LOX	1	1
P28482	MAPK1	1	1
P30154	PPP2R1B	1	1
P38936	CDKN1A	1	1
P49715	CEBPA	1	1
P51148	RAB5C	1	1
P52292	KPNA2	1	1
P56556	NDUFA6	1	1
P60900	PSMA6	1	1
P62258	YWHAE	1	1
P62263	RPS14	1	1
P63092	GNAS	1	1
P67870	CSNK2B	1	1
P68400	CSNK2A1	1	1
P78362	SRPK2	1	1
Q01968	OCRL	1	1
Q05193	DNM1	1	1
Q05397	PTK2	1	1
Q06830	PRDX1	1	1
Q07157	TJP1	1	1
Q08050	FOXM1	1	1
Q08AM6	VAC14	1	1
Q13043	STK4	1	1
Q13153	PAK1	1	1
Q14008	CKAP5	1	1
Q14686	NCOA6	1	1
Q14847	LASP1	1	1
Q15038	DAZAP2	1	1
Q15113	PCOLCE	1	1
Q15428	SF3A2	1	1
Q15637	SF1	1	1
Q16531	DDB1	1	1
Q16665	HIF1A	1	1
Q16795	NDUFA9	1	1
Q7L5N1	COPS6	1	1
Q8IXL6	FAM20C	1	1
Q8IY31	IFT20	1	1
Q92731	ESR2	1	1
Q92734	TFG	1	1
Q93062	RBPMS	1	1
Q96B97	SH3KBP1	1	1
Q96CW1	AP2M1	1	1
Q96FW1	OTUB1	1	1
Q96HR9	REEP6	1	1
Q96NL6	SCLT1	1	1
Q99442	SEC62	1	1
Q99598	TSNAX	1	1
Q9BY84	DUSP16	1	1
Q9C009	FOXQ1	1	1
Q9H492	MAP1LC3A	1	1
Q9NQ11	ATP13A2	1	1
Q9NQC3	RTN4	1	1
Q9NWT6	HIF1AN	1	1
Q9NY93	DDX56	1	1
Q9NYU2	UGGT1	1	1
Q9UBU9	NXF1	1	1
Q9UG01	IFT172	1	1
Q9UHX1	PUF60	1	1
Q9UJV9	DDX41	1	1
Q9UKR5	C14orf1	1	1
Q9UQB8	BAIAP2	1	1
Q9Y5S9	RBM8A	1	1
Q9Y6K9	IKBKG	1	1

## Sheet: STAD
Target Uniprotkb	Target Genesymbol	Connections	Patient	Tissue		Target Uniprotkb	Target Genesymbol	N patients STAD
P01023	A2M	10	5720	STAD		P08238	HSP90AB1	29
P02751	FN1	39	5720	STAD		P35579	MYH9	27
P04637	TP53	15	5720	STAD		P63104	YWHAZ	22
P05067	APP	9	5720	STAD		P02751	FN1	18
P05412	JUN	86	5720	STAD		P11021	HSPA5	14
P08238	HSP90AB1	20	5720	STAD		P21333	FLNA	14
P35579	MYH9	8	5720	STAD		P60709	ACTB	13
P63104	YWHAZ	24	5720	STAD		O95758	ROD1	12
P67809	YBX1	16	5720	STAD		P46940	IQGAP1	10
Q00839	HNRNPU	15	5720	STAD		P67809	YBX1	10
P02751	FN1	25	5721	STAD		P04626	ERBB2	8
P08238	HSP90AB1	15	5721	STAD		P07900	HSP90AA1	7
P19320	VCAM1	47	5721	STAD		P31946	YWHAB	7
P21333	FLNA	8	5721	STAD		P04792	HSPB1	6
P27635	RPL10	9	5721	STAD		P21860	ERBB3	6
P33993	MCM7	7	5721	STAD		P01023	A2M	5
P35579	MYH9	13	5721	STAD		P30101	PDIA3	5
P60709	ACTB	15	5721	STAD		P33993	MCM7	5
Q00839	HNRNPU	8	5721	STAD		P51858	HDGF	5
Q16666	IFI16	6	5721	STAD		Q00839	HNRNPU	5
P01106	MYC	30	5722	STAD		P05067	APP	4
P04637	TP53	16	5722	STAD		P12830	CDH1	4
P06748	NPM1	42	5722	STAD		Q9UHB6	LIMA1	4
P08238	HSP90AB1	11	5722	STAD		P05412	JUN	3
P16104	H2AFX	25	5722	STAD		P16104	H2AFX	3
P19320	VCAM1	97	5722	STAD		P27635	RPL10	3
P51858	HDGF	19	5722	STAD		P61160	ACTR2	3
P62280	RPS11	10	5722	STAD		Q8N3V7	SYNPO	3
P63104	YWHAZ	31	5722	STAD		Q9NR12	PDLIM7	3
P67809	YBX1	21	5722	STAD		O95166	GABARAP	2
P01023	A2M	5	5734	STAD		P01106	MYC	2
P02751	FN1	17	5734	STAD		P04637	TP53	2
P04792	HSPB1	7	5734	STAD		P06748	NPM1	2
P05067	APP	7	5734	STAD		P12004	PCNA	2
P05412	JUN	36	5734	STAD		P19320	VCAM1	2
P08238	HSP90AB1	11	5734	STAD		P27824	CANX	2
P19338	NCL	4	5734	STAD		P51617	IRAK1	2
P35579	MYH9	6	5734	STAD		P56945	BCAR1	2
P42224	STAT1	4	5734	STAD		P62280	RPS11	2
P67809	YBX1	6	5734	STAD		Q03518	TAP1	2
O95166	GABARAP	41	6453	STAD		Q16666	IFI16	2
P01023	A2M	5	6453	STAD		Q71U36	TUBA1A	2
P02751	FN1	25	6453	STAD		Q92597	NDRG1	2
P07900	HSP90AA1	5	6453	STAD		O00159	MYO1C	1
P08238	HSP90AB1	12	6453	STAD		P00519	ABL1	1
P08670	VIM	6	6453	STAD		P00533	EGFR	1
P29692	EEF1D	5	6453	STAD		P01100	FOS	1
P35579	MYH9	8	6453	STAD		P08670	VIM	1
P63104	YWHAZ	14	6453	STAD		P19338	NCL	1
Q92597	NDRG1	6	6453	STAD		P21980	TGM2	1
P05067	APP	5	6454	STAD		P29692	EEF1D	1
P08238	HSP90AB1	10	6454	STAD		P35222	CTNNB1	1
P12830	CDH1	6	6454	STAD		P42224	STAT1	1
P21860	ERBB3	7	6454	STAD		P45973	CBX5	1
P33993	MCM7	6	6454	STAD		P46531	NOTCH1	1
P35579	MYH9	10	6454	STAD		P61769	B2M	1
P45973	CBX5	5	6454	STAD		P61981	YWHAG	1
P46940	IQGAP1	4	6454	STAD		P62136	PPP1CA	1
P51858	HDGF	5	6454	STAD		P62140	PPP1CB	1
Q00839	HNRNPU	6	6454	STAD		P62258	YWHAE	1
P02751	FN1	32	6457	STAD		P67870	CSNK2B	1
P04792	HSPB1	8	6457	STAD		Q13131	PRKAA1	1
P08238	HSP90AB1	18	6457	STAD		Q13418	ILK	1
P21333	FLNA	15	6457	STAD		Q13509	TUBB4	1
P35579	MYH9	25	6457	STAD		Q14103	HNRNPD	1
P60709	ACTB	16	6457	STAD		Q16659	MAPK6	1
Q13418	ILK	8	6457	STAD		Q92614	MYO18A	1
Q71U36	TUBA1A	9	6457	STAD
Q8N3V7	SYNPO	14	6457	STAD
Q9NR12	PDLIM7	15	6457	STAD
P00533	EGFR	22	6458	STAD
P02751	FN1	36	6458	STAD
P04792	HSPB1	9	6458	STAD
P08238	HSP90AB1	13	6458	STAD
P21333	FLNA	13	6458	STAD
P35579	MYH9	16	6458	STAD
P46940	IQGAP1	8	6458	STAD
P51617	IRAK1	7	6458	STAD
P60709	ACTB	13	6458	STAD
Q00839	HNRNPU	7	6458	STAD
O00159	MYO1C	15	6564	STAD
P00519	ABL1	16	6564	STAD
P02751	FN1	34	6564	STAD
P04792	HSPB1	11	6564	STAD
P08238	HSP90AB1	11	6564	STAD
P21333	FLNA	21	6564	STAD
P60709	ACTB	22	6564	STAD
Q71U36	TUBA1A	10	6564	STAD
Q8N3V7	SYNPO	22	6564	STAD
Q9NR12	PDLIM7	13	6564	STAD
P02751	FN1	44	6802	STAD
P07900	HSP90AA1	13	6802	STAD
P08238	HSP90AB1	24	6802	STAD
P11021	HSPA5	13	6802	STAD
P21333	FLNA	21	6802	STAD
P35579	MYH9	27	6802	STAD
P56945	BCAR1	33	6802	STAD
P60709	ACTB	16	6802	STAD
P63104	YWHAZ	37	6802	STAD
Q92614	MYO18A	18	6802	STAD
O95758	ROD1	9	6852	STAD
P02751	FN1	30	6852	STAD
P04792	HSPB1	7	6852	STAD
P07900	HSP90AA1	10	6852	STAD
P08238	HSP90AB1	18	6852	STAD
P21333	FLNA	14	6852	STAD
P35579	MYH9	18	6852	STAD
P46531	NOTCH1	7	6852	STAD
P46940	IQGAP1	11	6852	STAD
P63104	YWHAZ	26	6852	STAD
P04792	HSPB1	7	7704	STAD
P12004	PCNA	5	7704	STAD
P16104	H2AFX	16	7704	STAD
P27635	RPL10	11	7704	STAD
P60709	ACTB	11	7704	STAD
P62136	PPP1CA	5	7704	STAD
P62258	YWHAE	4	7704	STAD
P63104	YWHAZ	21	7704	STAD
P67870	CSNK2B	4	7704	STAD
Q03518	TAP1	4	7704	STAD
P02751	FN1	41	7715	STAD
P04626	ERBB2	14	7715	STAD
P07900	HSP90AA1	10	7715	STAD
P08238	HSP90AB1	12	7715	STAD
P11021	HSPA5	11	7715	STAD
P21333	FLNA	10	7715	STAD
P33993	MCM7	10	7715	STAD
P35579	MYH9	11	7715	STAD
P63104	YWHAZ	24	7715	STAD
P67809	YBX1	16	7715	STAD
P01023	A2M	7	7716	STAD
P02751	FN1	40	7716	STAD
P07900	HSP90AA1	9	7716	STAD
P08238	HSP90AB1	13	7716	STAD
P30101	PDIA3	7	7716	STAD
P31946	YWHAB	8	7716	STAD
P35579	MYH9	14	7716	STAD
P61981	YWHAG	6	7716	STAD
P67809	YBX1	12	7716	STAD
Q13509	TUBB4	10	7716	STAD
O95166	GABARAP	53	7735	STAD
P02751	FN1	54	7735	STAD
P04626	ERBB2	19	7735	STAD
P08238	HSP90AB1	17	7735	STAD
P11021	HSPA5	17	7735	STAD
P21333	FLNA	17	7735	STAD
P35579	MYH9	21	7735	STAD
P60709	ACTB	20	7735	STAD
P63104	YWHAZ	29	7735	STAD
P67809	YBX1	16	7735	STAD
P01023	A2M	9	7806	STAD
P05067	APP	4	7806	STAD
P08238	HSP90AB1	7	7806	STAD
P21980	TGM2	4	7806	STAD
P27635	RPL10	25	7806	STAD
P35579	MYH9	8	7806	STAD
P51617	IRAK1	3	7806	STAD
P51858	HDGF	9	7806	STAD
P61769	B2M	3	7806	STAD
P62280	RPS11	4	7806	STAD
P07900	HSP90AA1	9	7829	STAD
P08238	HSP90AB1	11	7829	STAD
P11021	HSPA5	13	7829	STAD
P30101	PDIA3	6	7829	STAD
P31946	YWHAB	8	7829	STAD
P35579	MYH9	13	7829	STAD
P51858	HDGF	8	7829	STAD
P63104	YWHAZ	31	7829	STAD
Q13131	PRKAA1	6	7829	STAD
Q14103	HNRNPD	8	7829	STAD
P02751	FN1	32	7851	STAD
P07900	HSP90AA1	10	7851	STAD
P08238	HSP90AB1	19	7851	STAD
P11021	HSPA5	9	7851	STAD
P21333	FLNA	12	7851	STAD
P35579	MYH9	14	7851	STAD
P46940	IQGAP1	9	7851	STAD
P60709	ACTB	16	7851	STAD
P63104	YWHAZ	32	7851	STAD
P67809	YBX1	13	7851	STAD
O95758	ROD1	16	7968	STAD
P02751	FN1	45	7968	STAD
P04626	ERBB2	20	7968	STAD
P08238	HSP90AB1	20	7968	STAD
P11021	HSPA5	14	7968	STAD
P21333	FLNA	17	7968	STAD
P35579	MYH9	22	7968	STAD
P60709	ACTB	19	7968	STAD
P63104	YWHAZ	33	7968	STAD
P67809	YBX1	26	7968	STAD
O95758	ROD1	21	8238	STAD
P01106	MYC	34	8238	STAD
P02751	FN1	50	8238	STAD
P21333	FLNA	16	8238	STAD
P35579	MYH9	18	8238	STAD
P46940	IQGAP1	15	8238	STAD
P60709	ACTB	24	8238	STAD
P63104	YWHAZ	32	8238	STAD
P67809	YBX1	20	8238	STAD
Q00839	HNRNPU	35	8238	STAD
P01100	FOS	8	8462	STAD
P02751	FN1	36	8462	STAD
P05412	JUN	63	8462	STAD
P08238	HSP90AB1	10	8462	STAD
P16104	H2AFX	13	8462	STAD
P21333	FLNA	15	8462	STAD
P30101	PDIA3	8	8462	STAD
P35579	MYH9	19	8462	STAD
P60709	ACTB	15	8462	STAD
Q8N3V7	SYNPO	13	8462	STAD
O95758	ROD1	13	8663	STAD
P02751	FN1	32	8663	STAD
P08238	HSP90AB1	17	8663	STAD
P21333	FLNA	17	8663	STAD
P33993	MCM7	10	8663	STAD
P35222	CTNNB1	10	8663	STAD
P35579	MYH9	22	8663	STAD
P56945	BCAR1	20	8663	STAD
P63104	YWHAZ	30	8663	STAD
Q9NR12	PDLIM7	11	8663	STAD
O95758	ROD1	22	A4G3	STAD
P04626	ERBB2	24	A4G3	STAD
P08238	HSP90AB1	16	A4G3	STAD
P11021	HSPA5	12	A4G3	STAD
P12830	CDH1	10	A4G3	STAD
P21860	ERBB3	12	A4G3	STAD
P35579	MYH9	25	A4G3	STAD
P51858	HDGF	9	A4G3	STAD
P63104	YWHAZ	42	A4G3	STAD
Q9UHB6	LIMA1	17	A4G3	STAD
O95758	ROD1	10	A4GC	STAD
P04626	ERBB2	15	A4GC	STAD
P08238	HSP90AB1	12	A4GC	STAD
P11021	HSPA5	8	A4GC	STAD
P12004	PCNA	9	A4GC	STAD
P12830	CDH1	9	A4GC	STAD
P21860	ERBB3	9	A4GC	STAD
P31946	YWHAB	7	A4GC	STAD
P63104	YWHAZ	28	A4GC	STAD
Q9UHB6	LIMA1	14	A4GC	STAD
P04626	ERBB2	19	A4GH	STAD
P08238	HSP90AB1	14	A4GH	STAD
P11021	HSPA5	12	A4GH	STAD
P27824	CANX	8	A4GH	STAD
P30101	PDIA3	8	A4GH	STAD
P31946	YWHAB	8	A4GH	STAD
P35579	MYH9	21	A4GH	STAD
P61160	ACTR2	9	A4GH	STAD
P63104	YWHAZ	31	A4GH	STAD
Q16659	MAPK6	24	A4GH	STAD
O95758	ROD1	13	A4GN	STAD
P04626	ERBB2	19	A4GN	STAD
P06748	NPM1	11	A4GN	STAD
P08238	HSP90AB1	13	A4GN	STAD
P11021	HSPA5	11	A4GN	STAD
P21860	ERBB3	12	A4GN	STAD
P33993	MCM7	14	A4GN	STAD
P35579	MYH9	19	A4GN	STAD
P46940	IQGAP1	16	A4GN	STAD
P63104	YWHAZ	39	A4GN	STAD
O95758	ROD1	20	A4GP	STAD
P08238	HSP90AB1	16	A4GP	STAD
P11021	HSPA5	13	A4GP	STAD
P12830	CDH1	10	A4GP	STAD
P21860	ERBB3	12	A4GP	STAD
P31946	YWHAB	10	A4GP	STAD
P35579	MYH9	26	A4GP	STAD
P46940	IQGAP1	24	A4GP	STAD
P63104	YWHAZ	37	A4GP	STAD
Q9UHB6	LIMA1	21	A4GP	STAD
O95758	ROD1	9	A4GY	STAD
P08238	HSP90AB1	9	A4GY	STAD
P11021	HSPA5	10	A4GY	STAD
P31946	YWHAB	6	A4GY	STAD
P35579	MYH9	14	A4GY	STAD
P46940	IQGAP1	10	A4GY	STAD
P61160	ACTR2	6	A4GY	STAD
P63104	YWHAZ	20	A4GY	STAD
Q03518	TAP1	5	A4GY	STAD
Q16666	IFI16	5	A4GY	STAD
O95758	ROD1	8	A4HB	STAD
P08238	HSP90AB1	9	A4HB	STAD
P11021	HSPA5	8	A4HB	STAD
P21860	ERBB3	11	A4HB	STAD
P27824	CANX	6	A4HB	STAD
P31946	YWHAB	7	A4HB	STAD
P35579	MYH9	21	A4HB	STAD
P61160	ACTR2	7	A4HB	STAD
P63104	YWHAZ	24	A4HB	STAD
Q9UHB6	LIMA1	12	A4HB	STAD
O95758	ROD1	15	AB1V	STAD
P02751	FN1	41	AB1V	STAD
P04626	ERBB2	18	AB1V	STAD
P08238	HSP90AB1	16	AB1V	STAD
P21333	FLNA	19	AB1V	STAD
P35579	MYH9	25	AB1V	STAD
P46940	IQGAP1	17	AB1V	STAD
P60709	ACTB	24	AB1V	STAD
P62140	PPP1CB	20	AB1V	STAD
P63104	YWHAZ	38	AB1V	STAD
O95758	ROD1	17	AB1X	STAD
P08238	HSP90AB1	16	AB1X	STAD
P11021	HSPA5	12	AB1X	STAD
P30101	PDIA3	9	AB1X	STAD
P35579	MYH9	17	AB1X	STAD
P46940	IQGAP1	12	AB1X	STAD
P60709	ACTB	18	AB1X	STAD
P63104	YWHAZ	31	AB1X	STAD
P67809	YBX1	21	AB1X	STAD
Q92597	NDRG1	9	AB1X	STAD

## Sheet: LUAD
Target Uniprotkb	Target Genesymbol	Connections	Patient	Tissue		Target Uniprotkb	Target Genesymbol	N patients LUAD
P06748	NPM1	36	2655	LUAD		P63104	YWHAZ	48
P08238	HSP90AB1	12	2655	LUAD		P08238	HSP90AB1	46
P11021	HSPA5	7	2655	LUAD		P11021	HSPA5	38
P26641	EEF1G	7	2655	LUAD		P02751	FN1	30
P27824	CANX	7	2655	LUAD		P60709	ACTB	27
P51858	HDGF	7	2655	LUAD		P27635	RPL10	26
P62140	PPP1CB	6	2655	LUAD		P51858	HDGF	26
P63104	YWHAZ	30	2655	LUAD		P06748	NPM1	24
P63244	GNB2L1	6	2655	LUAD		Q13509	TUBB4	24
Q13501	SQSTM1	5	2655	LUAD		P04626	ERBB2	23
P05067	APP	4	2657	LUAD		Q00839	HNRNPU	21
P11021	HSPA5	8	2657	LUAD		P35579	MYH9	18
P27635	RPL10	9	2657	LUAD		Q92597	NDRG1	16
P27824	CANX	3	2657	LUAD		P21333	FLNA	12
P29692	EEF1D	3	2657	LUAD		P04792	HSPB1	10
P35222	CTNNB1	3	2657	LUAD		O95758	ROD1	7
P63104	YWHAZ	9	2657	LUAD		P05412	JUN	7
Q06830	PRDX1	2	2657	LUAD		P07900	HSP90AA1	7
Q13162	PRDX4	2	2657	LUAD		P00533	EGFR	6
Q92841	DDX17	2	2657	LUAD		P19320	VCAM1	6
P06748	NPM1	53	2661	LUAD		P21860	ERBB3	6
P26641	EEF1G	8	2661	LUAD		P62140	PPP1CB	6
P27635	RPL10	61	2661	LUAD		P67809	YBX1	6
P47755	CAPZA2	7	2661	LUAD		Q00987	MDM2	6
P60953	CDC42	6	2661	LUAD		Q16666	IFI16	6
P62140	PPP1CB	6	2661	LUAD		P05067	APP	5
P62280	RPS11	9	2661	LUAD		P46940	IQGAP1	5
P63104	YWHAZ	19	2661	LUAD		P51617	IRAK1	5
P63244	GNB2L1	5	2661	LUAD		P63244	GNB2L1	5
Q13185	CBX3	5	2661	LUAD		P26641	EEF1G	4
P02751	FN1	40	2662	LUAD		P30101	PDIA3	4
P04626	ERBB2	21	2662	LUAD		P62280	RPS11	4
P08238	HSP90AB1	16	2662	LUAD		Q9UQ80	PA2G4	4
P11021	HSPA5	11	2662	LUAD		P09651	HNRNPA1	3
P51858	HDGF	9	2662	LUAD		P12830	CDH1	3
P60709	ACTB	18	2662	LUAD		P27824	CANX	3
P61160	ACTR2	9	2662	LUAD		P33993	MCM7	3
P63104	YWHAZ	32	2662	LUAD		Q13547	HDAC1	3
Q13509	TUBB4	16	2662	LUAD		Q16643	DBN1	3
Q92597	NDRG1	9	2662	LUAD		Q92542	NCSTN	3
P02751	FN1	28	2665	LUAD		O95166	GABARAP	2
P06748	NPM1	27	2665	LUAD		P01023	A2M	2
P07900	HSP90AA1	8	2665	LUAD		P01106	MYC	2
P08238	HSP90AB1	14	2665	LUAD		P29353	SHC1	2
P11021	HSPA5	8	2665	LUAD		P29692	EEF1D	2
P19320	VCAM1	60	2665	LUAD		P35222	CTNNB1	2
P27635	RPL10	30	2665	LUAD		P43243	MATR3	2
P51858	HDGF	8	2665	LUAD		P45973	CBX5	2
Q16666	IFI16	10	2665	LUAD		P61160	ACTR2	2
Q92597	NDRG1	8	2665	LUAD		P62136	PPP1CA	2
O95758	ROD1	16	2666	LUAD		Q13501	SQSTM1	2
P02751	FN1	41	2666	LUAD		Q71U36	TUBA1A	2
P08238	HSP90AB1	17	2666	LUAD		Q9H3D4	TP63	2
P11021	HSPA5	15	2666	LUAD		O00567	NOP56	1
P35579	MYH9	20	2666	LUAD		O00716	E2F3	1
P51858	HDGF	11	2666	LUAD		O15027	SEC16A	1
P63104	YWHAZ	34	2666	LUAD		O15264	MAPK13	1
Q13509	TUBB4	14	2666	LUAD		P03372	ESR1	1
Q14103	HNRNPD	11	2666	LUAD		P09874	PARP1	1
Q92597	NDRG1	11	2666	LUAD		P0CG48	UBC	1
P04626	ERBB2	12	3396	LUAD		P11387	TOP1	1
P04792	HSPB1	6	3396	LUAD		P17096	HMGA1	1
P08238	HSP90AB1	12	3396	LUAD		P27348	YWHAQ	1
P11021	HSPA5	9	3396	LUAD		P46379	BAT3	1
P27348	YWHAQ	4	3396	LUAD		P47755	CAPZA2	1
P33993	MCM7	6	3396	LUAD		P49755	TMED10	1
P60709	ACTB	14	3396	LUAD		P52292	KPNA2	1
P61981	YWHAG	4	3396	LUAD		P56945	BCAR1	1
P63104	YWHAZ	31	3396	LUAD		P60953	CDC42	1
Q13509	TUBB4	10	3396	LUAD		P61981	YWHAG	1
P02751	FN1	36	4490	LUAD		P83916	CBX1	1
P04626	ERBB2	17	4490	LUAD		P84022	SMAD3	1
P04792	HSPB1	10	4490	LUAD		Q03518	TAP1	1
P05412	JUN	75	4490	LUAD		Q04917	YWHAH	1
P08238	HSP90AB1	14	4490	LUAD		Q05397	PTK2	1
P11021	HSPA5	13	4490	LUAD		Q06830	PRDX1	1
P21333	FLNA	18	4490	LUAD		Q12905	ILF2	1
P35579	MYH9	22	4490	LUAD		Q13131	PRKAA1	1
P60709	ACTB	18	4490	LUAD		Q13162	PRDX4	1
Q16643	DBN1	18	4490	LUAD		Q13185	CBX3	1
P02751	FN1	20	4512	LUAD		Q14008	CKAP5	1
P04626	ERBB2	6	4512	LUAD		Q14103	HNRNPD	1
P04792	HSPB1	7	4512	LUAD		Q14192	FHL2	1
P05412	JUN	46	4512	LUAD		Q5S007	LRRK2	1
P08238	HSP90AB1	10	4512	LUAD		Q92841	DDX17	1
P12830	CDH1	6	4512	LUAD		Q9BPW8	NIPSNAP1	1
P21333	FLNA	12	4512	LUAD		Q9P0L0	VAPA	1
P35579	MYH9	13	4512	LUAD		Q9UHB6	LIMA1	1
P60709	ACTB	9	4512	LUAD
P63104	YWHAZ	26	4512	LUAD
P01106	MYC	55	4625	LUAD
P02751	FN1	63	4625	LUAD
P08238	HSP90AB1	20	4625	LUAD
P11021	HSPA5	15	4625	LUAD
P33993	MCM7	15	4625	LUAD
P60709	ACTB	22	4625	LUAD
P63104	YWHAZ	40	4625	LUAD
Q00839	HNRNPU	20	4625	LUAD
Q13509	TUBB4	22	4625	LUAD
Q16666	IFI16	17	4625	LUAD
P01023	A2M	6	4626	LUAD
P02751	FN1	26	4626	LUAD
P05067	APP	6	4626	LUAD
P08238	HSP90AB1	14	4626	LUAD
P11021	HSPA5	9	4626	LUAD
P21333	FLNA	11	4626	LUAD
P35579	MYH9	14	4626	LUAD
P46940	IQGAP1	8	4626	LUAD
P60709	ACTB	9	4626	LUAD
Q5S007	LRRK2	13	4626	LUAD
P02751	FN1	34	4627	LUAD
P08238	HSP90AB1	16	4627	LUAD
P11021	HSPA5	13	4627	LUAD
P19320	VCAM1	64	4627	LUAD
P21333	FLNA	18	4627	LUAD
P27635	RPL10	18	4627	LUAD
P35579	MYH9	19	4627	LUAD
P63104	YWHAZ	31	4627	LUAD
Q13509	TUBB4	14	4627	LUAD
Q16643	DBN1	15	4627	LUAD
P02751	FN1	62	4632	LUAD
P04792	HSPB1	11	4632	LUAD
P08238	HSP90AB1	17	4632	LUAD
P11021	HSPA5	10	4632	LUAD
P27635	RPL10	43	4632	LUAD
P60709	ACTB	32	4632	LUAD
P62140	PPP1CB	10	4632	LUAD
P63104	YWHAZ	38	4632	LUAD
Q13509	TUBB4	16	4632	LUAD
Q92597	NDRG1	9	4632	LUAD
P02751	FN1	61	4676	LUAD
P04626	ERBB2	20	4676	LUAD
P06748	NPM1	25	4676	LUAD
P08238	HSP90AB1	23	4676	LUAD
P11021	HSPA5	14	4676	LUAD
P27635	RPL10	27	4676	LUAD
P51617	IRAK1	13	4676	LUAD
P63104	YWHAZ	40	4676	LUAD
Q00839	HNRNPU	28	4676	LUAD
Q92597	NDRG1	16	4676	LUAD
P04792	HSPB1	8	5645	LUAD
P06748	NPM1	19	5645	LUAD
P21333	FLNA	6	5645	LUAD
P26641	EEF1G	6	5645	LUAD
P27635	RPL10	24	5645	LUAD
P46940	IQGAP1	6	5645	LUAD
P60709	ACTB	18	5645	LUAD
Q00839	HNRNPU	19	5645	LUAD
Q00987	MDM2	9	5645	LUAD
Q9H3D4	TP63	9	5645	LUAD
P04626	ERBB2	23	5930	LUAD
P08238	HSP90AB1	13	5930	LUAD
P11021	HSPA5	15	5930	LUAD
P21860	ERBB3	11	5930	LUAD
P51858	HDGF	11	5930	LUAD
P63104	YWHAZ	35	5930	LUAD
Q00839	HNRNPU	37	5930	LUAD
Q13509	TUBB4	14	5930	LUAD
Q92542	NCSTN	8	5930	LUAD
Q92597	NDRG1	10	5930	LUAD
O00567	NOP56	30	5931	LUAD
P02751	FN1	60	5931	LUAD
P06748	NPM1	39	5931	LUAD
P08238	HSP90AB1	19	5931	LUAD
P09651	HNRNPA1	18	5931	LUAD
P51858	HDGF	22	5931	LUAD
P63104	YWHAZ	37	5931	LUAD
P67809	YBX1	30	5931	LUAD
Q00839	HNRNPU	49	5931	LUAD
Q16666	IFI16	17	5931	LUAD
O15264	MAPK13	33	5932	LUAD
P04626	ERBB2	21	5932	LUAD
P06748	NPM1	39	5932	LUAD
P08238	HSP90AB1	18	5932	LUAD
P27635	RPL10	43	5932	LUAD
P46940	IQGAP1	14	5932	LUAD
P51858	HDGF	15	5932	LUAD
P62136	PPP1CA	13	5932	LUAD
P63104	YWHAZ	36	5932	LUAD
Q00839	HNRNPU	37	5932	LUAD
P00533	EGFR	32	5933	LUAD
P02751	FN1	46	5933	LUAD
P04792	HSPB1	10	5933	LUAD
P06748	NPM1	11	5933	LUAD
P08238	HSP90AB1	20	5933	LUAD
P11021	HSPA5	12	5933	LUAD
P35579	MYH9	18	5933	LUAD
P60709	ACTB	21	5933	LUAD
P63104	YWHAZ	34	5933	LUAD
Q92597	NDRG1	7	5933	LUAD
P04626	ERBB2	11	5935	LUAD
P04792	HSPB1	10	5935	LUAD
P06748	NPM1	25	5935	LUAD
P08238	HSP90AB1	15	5935	LUAD
P27635	RPL10	32	5935	LUAD
P51858	HDGF	9	5935	LUAD
P60709	ACTB	19	5935	LUAD
P63104	YWHAZ	25	5935	LUAD
Q00839	HNRNPU	27	5935	LUAD
Q92597	NDRG1	10	5935	LUAD
P02751	FN1	58	5936	LUAD
P06748	NPM1	33	5936	LUAD
P08238	HSP90AB1	17	5936	LUAD
P27635	RPL10	39	5936	LUAD
P51858	HDGF	13	5936	LUAD
P60709	ACTB	31	5936	LUAD
P63104	YWHAZ	47	5936	LUAD
Q00987	MDM2	14	5936	LUAD
Q92597	NDRG1	12	5936	LUAD
Q9UQ80	PA2G4	11	5936	LUAD
O95758	ROD1	27	5939	LUAD
P00533	EGFR	47	5939	LUAD
P06748	NPM1	26	5939	LUAD
P11021	HSPA5	13	5939	LUAD
P21333	FLNA	20	5939	LUAD
P30101	PDIA3	8	5939	LUAD
P51858	HDGF	12	5939	LUAD
P63104	YWHAZ	41	5939	LUAD
P84022	SMAD3	8	5939	LUAD
Q92597	NDRG1	11	5939	LUAD
O95758	ROD1	14	6145	LUAD
P08238	HSP90AB1	10	6145	LUAD
P0CG48	UBC	6	6145	LUAD
P11021	HSPA5	6	6145	LUAD
P21860	ERBB3	7	6145	LUAD
P29353	SHC1	5	6145	LUAD
P30101	PDIA3	7	6145	LUAD
P61160	ACTR2	9	6145	LUAD
P62280	RPS11	5	6145	LUAD
Q03518	TAP1	6	6145	LUAD
O15027	SEC16A	6	6146	LUAD
O95758	ROD1	12	6146	LUAD
P04626	ERBB2	19	6146	LUAD
P08238	HSP90AB1	7	6146	LUAD
P11021	HSPA5	9	6146	LUAD
P30101	PDIA3	6	6146	LUAD
P63104	YWHAZ	28	6146	LUAD
Q04917	YWHAH	7	6146	LUAD
Q14192	FHL2	5	6146	LUAD
Q9UHB6	LIMA1	12	6146	LUAD
P04626	ERBB2	11	6147	LUAD
P07900	HSP90AA1	4	6147	LUAD
P26641	EEF1G	5	6147	LUAD
P27635	RPL10	37	6147	LUAD
P29692	EEF1D	4	6147	LUAD
P62280	RPS11	7	6147	LUAD
P63104	YWHAZ	17	6147	LUAD
P63244	GNB2L1	4	6147	LUAD
Q05397	PTK2	4	6147	LUAD
Q92597	NDRG1	8	6147	LUAD
O95166	GABARAP	65	6148	LUAD
P01023	A2M	10	6148	LUAD
P04626	ERBB2	9	6148	LUAD
P05412	JUN	100	6148	LUAD
P08238	HSP90AB1	14	6148	LUAD
P27635	RPL10	50	6148	LUAD
P62280	RPS11	8	6148	LUAD
P63244	GNB2L1	6	6148	LUAD
Q00987	MDM2	11	6148	LUAD
Q9H3D4	TP63	12	6148	LUAD
P00533	EGFR	46	6595	LUAD
P02751	FN1	69	6595	LUAD
P06748	NPM1	33	6595	LUAD
P08238	HSP90AB1	19	6595	LUAD
P11021	HSPA5	14	6595	LUAD
P51858	HDGF	16	6595	LUAD
P60709	ACTB	36	6595	LUAD
P63104	YWHAZ	45	6595	LUAD
Q00839	HNRNPU	36	6595	LUAD
Q13509	TUBB4	18	6595	LUAD
P08238	HSP90AB1	7	6742	LUAD
P09874	PARP1	4	6742	LUAD
P17096	HMGA1	5	6742	LUAD
P21860	ERBB3	4	6742	LUAD
P30101	PDIA3	4	6742	LUAD
P51858	HDGF	12	6742	LUAD
P63104	YWHAZ	22	6742	LUAD
Q00839	HNRNPU	12	6742	LUAD
Q13547	HDAC1	5	6742	LUAD
Q9BPW8	NIPSNAP1	4	6742	LUAD
P02751	FN1	41	6743	LUAD
P04626	ERBB2	22	6743	LUAD
P07900	HSP90AA1	9	6743	LUAD
P11021	HSPA5	12	6743	LUAD
P21860	ERBB3	9	6743	LUAD
P29353	SHC1	8	6743	LUAD
P35579	MYH9	9	6743	LUAD
P49755	TMED10	6	6743	LUAD
P51617	IRAK1	7	6743	LUAD
P51858	HDGF	9	6743	LUAD
P02751	FN1	46	6744	LUAD
P04626	ERBB2	16	6744	LUAD
P06748	NPM1	38	6744	LUAD
P08238	HSP90AB1	13	6744	LUAD
P27635	RPL10	46	6744	LUAD
P51858	HDGF	14	6744	LUAD
P60709	ACTB	27	6744	LUAD
P63104	YWHAZ	33	6744	LUAD
Q00839	HNRNPU	38	6744	LUAD
Q00987	MDM2	12	6744	LUAD
O95758	ROD1	13	6745	LUAD
P02751	FN1	56	6745	LUAD
P04626	ERBB2	20	6745	LUAD
P08238	HSP90AB1	18	6745	LUAD
P21333	FLNA	19	6745	LUAD
P35579	MYH9	27	6745	LUAD
P46940	IQGAP1	19	6745	LUAD
P60709	ACTB	18	6745	LUAD
P63104	YWHAZ	38	6745	LUAD
Q13509	TUBB4	15	6745	LUAD
P00533	EGFR	49	6761	LUAD
P06748	NPM1	45	6761	LUAD
P08238	HSP90AB1	16	6761	LUAD
P11021	HSPA5	18	6761	LUAD
P27635	RPL10	52	6761	LUAD
P60709	ACTB	37	6761	LUAD
P63104	YWHAZ	46	6761	LUAD
Q00839	HNRNPU	42	6761	LUAD
Q13509	TUBB4	21	6761	LUAD
Q92597	NDRG1	18	6761	LUAD
P04626	ERBB2	19	6776	LUAD
P08238	HSP90AB1	15	6776	LUAD
P11021	HSPA5	9	6776	LUAD
P21860	ERBB3	8	6776	LUAD
P27635	RPL10	30	6776	LUAD
P46379	BAT3	7	6776	LUAD
P46940	IQGAP1	8	6776	LUAD
P51858	HDGF	7	6776	LUAD
P63104	YWHAZ	24	6776	LUAD
P63244	GNB2L1	6	6776	LUAD
P02751	FN1	44	6777	LUAD
P06748	NPM1	23	6777	LUAD
P08238	HSP90AB1	17	6777	LUAD
P19320	VCAM1	86	6777	LUAD
P21333	FLNA	13	6777	LUAD
P27635	RPL10	32	6777	LUAD
P35579	MYH9	19	6777	LUAD
P60709	ACTB	21	6777	LUAD
P63104	YWHAZ	29	6777	LUAD
Q00839	HNRNPU	23	6777	LUAD
O00716	E2F3	12	6778	LUAD
P07900	HSP90AA1	8	6778	LUAD
P08238	HSP90AB1	11	6778	LUAD
P11021	HSPA5	10	6778	LUAD
P45973	CBX5	8	6778	LUAD
P51858	HDGF	11	6778	LUAD
P83916	CBX1	6	6778	LUAD
Q00839	HNRNPU	5	6778	LUAD
Q13509	TUBB4	16	6778	LUAD
Q14008	CKAP5	4	6778	LUAD
P05067	APP	6	6828	LUAD
P07900	HSP90AA1	7	6828	LUAD
P08238	HSP90AB1	11	6828	LUAD
P11021	HSPA5	11	6828	LUAD
P12830	CDH1	6	6828	LUAD
P35222	CTNNB1	7	6828	LUAD
P63104	YWHAZ	20	6828	LUAD
Q13131	PRKAA1	5	6828	LUAD
Q16666	IFI16	6	6828	LUAD
Q92597	NDRG1	8	6828	LUAD
P02751	FN1	39	6829	LUAD
P04626	ERBB2	17	6829	LUAD
P08238	HSP90AB1	12	6829	LUAD
P11021	HSPA5	13	6829	LUAD
P19320	VCAM1	58	6829	LUAD
P35579	MYH9	16	6829	LUAD
P51858	HDGF	9	6829	LUAD
P63104	YWHAZ	24	6829	LUAD
Q13509	TUBB4	18	6829	LUAD
Q16643	DBN1	12	6829	LUAD
P02751	FN1	49	6831	LUAD
P04626	ERBB2	20	6831	LUAD
P08238	HSP90AB1	17	6831	LUAD
P11021	HSPA5	13	6831	LUAD
P51617	IRAK1	9	6831	LUAD
P51858	HDGF	12	6831	LUAD
P60709	ACTB	23	6831	LUAD
P62136	PPP1CA	11	6831	LUAD
P67809	YBX1	25	6831	LUAD
Q13547	HDAC1	12	6831	LUAD
P02751	FN1	30	6835	LUAD
P04626	ERBB2	9	6835	LUAD
P05412	JUN	49	6835	LUAD
P08238	HSP90AB1	10	6835	LUAD
P11021	HSPA5	11	6835	LUAD
P11387	TOP1	8	6835	LUAD
P35579	MYH9	15	6835	LUAD
P60709	ACTB	12	6835	LUAD
P63104	YWHAZ	20	6835	LUAD
Q16666	IFI16	10	6835	LUAD
O95758	ROD1	25	6836	LUAD
P03372	ESR1	64	6836	LUAD
P06748	NPM1	19	6836	LUAD
P08238	HSP90AB1	18	6836	LUAD
P11021	HSPA5	19	6836	LUAD
P51617	IRAK1	14	6836	LUAD
P51858	HDGF	15	6836	LUAD
P63104	YWHAZ	44	6836	LUAD
Q00839	HNRNPU	19	6836	LUAD
Q13509	TUBB4	29	6836	LUAD
P00533	EGFR	52	6847	LUAD
P06748	NPM1	34	6847	LUAD
P09651	HNRNPA1	21	6847	LUAD
P43243	MATR3	18	6847	LUAD
P60709	ACTB	35	6847	LUAD
P63104	YWHAZ	42	6847	LUAD
P67809	YBX1	34	6847	LUAD
Q00839	HNRNPU	40	6847	LUAD
Q13509	TUBB4	19	6847	LUAD
Q71U36	TUBA1A	22	6847	LUAD
O95166	GABARAP	72	6849	LUAD
P04792	HSPB1	10	6849	LUAD
P11021	HSPA5	8	6849	LUAD
P27635	RPL10	35	6849	LUAD
P27824	CANX	8	6849	LUAD
P51858	HDGF	10	6849	LUAD
P63104	YWHAZ	31	6849	LUAD
Q13501	SQSTM1	5	6849	LUAD
Q92542	NCSTN	6	6849	LUAD
Q9P0L0	VAPA	5	6849	LUAD
P02751	FN1	35	6868	LUAD
P07900	HSP90AA1	11	6868	LUAD
P12830	CDH1	7	6868	LUAD
P33993	MCM7	7	6868	LUAD
P45973	CBX5	9	6868	LUAD
P51858	HDGF	15	6868	LUAD
P63104	YWHAZ	27	6868	LUAD
Q12905	ILF2	6	6868	LUAD
Q13509	TUBB4	18	6868	LUAD
Q71U36	TUBA1A	16	6868	LUAD
P02751	FN1	53	6969	LUAD
P05412	JUN	150	6969	LUAD
P06748	NPM1	37	6969	LUAD
P19320	VCAM1	115	6969	LUAD
P27635	RPL10	42	6969	LUAD
P51858	HDGF	18	6969	LUAD
P63104	YWHAZ	37	6969	LUAD
P67809	YBX1	22	6969	LUAD
Q00839	HNRNPU	37	6969	LUAD
Q13509	TUBB4	19	6969	LUAD
P06748	NPM1	45	6970	LUAD
P08238	HSP90AB1	18	6970	LUAD
P11021	HSPA5	12	6970	LUAD
P27635	RPL10	53	6970	LUAD
P51858	HDGF	20	6970	LUAD
P63104	YWHAZ	38	6970	LUAD
Q00839	HNRNPU	43	6970	LUAD
Q13509	TUBB4	15	6970	LUAD
Q92542	NCSTN	9	6970	LUAD
Q92597	NDRG1	14	6970	LUAD
P02751	FN1	28	6971	LUAD
P05067	APP	7	6971	LUAD
P07900	HSP90AA1	8	6971	LUAD
P08238	HSP90AB1	15	6971	LUAD
P11021	HSPA5	11	6971	LUAD
P27635	RPL10	15	6971	LUAD
P51858	HDGF	7	6971	LUAD
P63104	YWHAZ	27	6971	LUAD
Q00839	HNRNPU	10	6971	LUAD
Q9UQ80	PA2G4	6	6971	LUAD
P04626	ERBB2	17	6972	LUAD
P04792	HSPB1	14	6972	LUAD
P06748	NPM1	52	6972	LUAD
P08238	HSP90AB1	17	6972	LUAD
P27635	RPL10	60	6972	LUAD
P43243	MATR3	11	6972	LUAD
P51858	HDGF	20	6972	LUAD
P63104	YWHAZ	33	6972	LUAD
P67809	YBX1	29	6972	LUAD
Q00839	HNRNPU	55	6972	LUAD
P02751	FN1	60	6975	LUAD
P04792	HSPB1	12	6975	LUAD
P08238	HSP90AB1	21	6975	LUAD
P11021	HSPA5	16	6975	LUAD
P21333	FLNA	22	6975	LUAD
P35579	MYH9	26	6975	LUAD
P60709	ACTB	22	6975	LUAD
P62140	PPP1CB	18	6975	LUAD
P63104	YWHAZ	45	6975	LUAD
Q13509	TUBB4	19	6975	LUAD
P02751	FN1	53	6978	LUAD
P08238	HSP90AB1	21	6978	LUAD
P19320	VCAM1	93	6978	LUAD
P21333	FLNA	20	6978	LUAD
P27635	RPL10	22	6978	LUAD
P35579	MYH9	22	6978	LUAD
P60709	ACTB	27	6978	LUAD
P63104	YWHAZ	39	6978	LUAD
Q00839	HNRNPU	19	6978	LUAD
Q13509	TUBB4	18	6978	LUAD
O95758	ROD1	11	6979	LUAD
P04626	ERBB2	12	6979	LUAD
P05067	APP	7	6979	LUAD
P11021	HSPA5	7	6979	LUAD
P35579	MYH9	11	6979	LUAD
P52292	KPNA2	4	6979	LUAD
P60709	ACTB	12	6979	LUAD
P63104	YWHAZ	25	6979	LUAD
Q13509	TUBB4	8	6979	LUAD
Q16666	IFI16	6	6979	LUAD
P02751	FN1	44	6980	LUAD
P05412	JUN	96	6980	LUAD
P06748	NPM1	16	6980	LUAD
P08238	HSP90AB1	18	6980	LUAD
P21333	FLNA	14	6980	LUAD
P27635	RPL10	18	6980	LUAD
P35579	MYH9	19	6980	LUAD
P60709	ACTB	21	6980	LUAD
P63104	YWHAZ	33	6980	LUAD
Q13509	TUBB4	14	6980	LUAD
P00533	EGFR	36	6981	LUAD
P02751	FN1	38	6981	LUAD
P04626	ERBB2	23	6981	LUAD
P08238	HSP90AB1	13	6981	LUAD
P11021	HSPA5	15	6981	LUAD
P35579	MYH9	15	6981	LUAD
P60709	ACTB	16	6981	LUAD
P62140	PPP1CB	8	6981	LUAD
P63104	YWHAZ	30	6981	LUAD
Q13509	TUBB4	14	6981	LUAD
P02751	FN1	47	6982	LUAD
P08238	HSP90AB1	16	6982	LUAD
P11021	HSPA5	13	6982	LUAD
P35579	MYH9	19	6982	LUAD
P51617	IRAK1	13	6982	LUAD
P60709	ACTB	17	6982	LUAD
P62140	PPP1CB	12	6982	LUAD
P63104	YWHAZ	41	6982	LUAD
P67809	YBX1	17	6982	LUAD
Q13509	TUBB4	19	6982	LUAD
P04626	ERBB2	15	6983	LUAD
P05412	JUN	133	6983	LUAD
P06748	NPM1	41	6983	LUAD
P08238	HSP90AB1	17	6983	LUAD
P09651	HNRNPA1	10	6983	LUAD
P11021	HSPA5	11	6983	LUAD
P27635	RPL10	50	6983	LUAD
P51858	HDGF	16	6983	LUAD
P63104	YWHAZ	34	6983	LUAD
Q00839	HNRNPU	44	6983	LUAD
P06748	NPM1	40	6984	LUAD
P08238	HSP90AB1	20	6984	LUAD
P11021	HSPA5	15	6984	LUAD
P21860	ERBB3	12	6984	LUAD
P27635	RPL10	47	6984	LUAD
P56945	BCAR1	41	6984	LUAD
P63104	YWHAZ	41	6984	LUAD
Q00987	MDM2	14	6984	LUAD
Q13547	HDAC1	10	6984	LUAD
Q9UQ80	PA2G4	14	6984	LUAD
P02751	FN1	23	6985	LUAD
P04626	ERBB2	12	6985	LUAD
P08238	HSP90AB1	11	6985	LUAD
P11021	HSPA5	11	6985	LUAD
P21333	FLNA	11	6985	LUAD
P35579	MYH9	10	6985	LUAD
P60709	ACTB	14	6985	LUAD
P63104	YWHAZ	25	6985	LUAD
Q13509	TUBB4	12	6985	LUAD
Q92597	NDRG1	8	6985	LUAD
P01106	MYC	47	6986	LUAD
P06748	NPM1	59	6986	LUAD
P08238	HSP90AB1	22	6986	LUAD
P11021	HSPA5	18	6986	LUAD
P27635	RPL10	69	6986	LUAD
P60709	ACTB	47	6986	LUAD
P63104	YWHAZ	43	6986	LUAD
Q00987	MDM2	17	6986	LUAD
Q92597	NDRG1	17	6986	LUAD
Q9UQ80	PA2G4	19	6986	LUAD

## Sheet: LUSC
Target Uniprotkb	Target Genesymbol	Connections	Patient	Tissue		Target Uniprotkb	Target Genesymbol	N patients LUSC
P02751	FN1	41	2709	LUSC		P63104	YWHAZ	48
P08238	HSP90AB1	15	2709	LUSC		P08238	HSP90AB1	39
P11021	HSPA5	10	2709	LUSC		P11021	HSPA5	28
P21333	FLNA	12	2709	LUSC		Q9H3D4	TP63	25
P33993	MCM7	8	2709	LUSC		P67809	YBX1	21
P35579	MYH9	16	2709	LUSC		P06748	NPM1	21
P51617	IRAK1	9	2709	LUSC		P02751	FN1	20
P60709	ACTB	14	2709	LUSC		P51858	HDGF	18
P63104	YWHAZ	29	2709	LUSC		P35579	MYH9	16
Q9H3D4	TP63	10	2709	LUSC		P60709	ACTB	15
P04792	HSPB1	12	3394	LUSC		Q00839	HNRNPU	15
P06748	NPM1	48	3394	LUSC		Q92597	NDRG1	14
P08238	HSP90AB1	20	3394	LUSC		P07900	HSP90AA1	13
P11021	HSPA5	12	3394	LUSC		P00533	EGFR	12
P27635	RPL10	54	3394	LUSC		P04792	HSPB1	11
P51858	HDGF	15	3394	LUSC		P27635	RPL10	11
P63104	YWHAZ	38	3394	LUSC		P33993	MCM7	10
Q16666	IFI16	10	3394	LUSC		Q16666	IFI16	10
Q92597	NDRG1	12	3394	LUSC		O95758	ROD1	9
Q9H3D4	TP63	14	3394	LUSC		Q13509	TUBB4	8
O95758	ROD1	20	4079	LUSC		O00567	NOP56	7
P06748	NPM1	28	4079	LUSC		Q16659	MAPK6	7
P08238	HSP90AB1	17	4079	LUSC		P01106	MYC	6
P61160	ACTR2	13	4079	LUSC		P21333	FLNA	6
P62140	PPP1CB	13	4079	LUSC		P62140	PPP1CB	6
P63104	YWHAZ	36	4079	LUSC		Q9UHB6	LIMA1	6
P67809	YBX1	18	4079	LUSC		Q14103	HNRNPD	5
Q13509	TUBB4	20	4079	LUSC		Q71U36	TUBA1A	5
Q16659	MAPK6	26	4079	LUSC		P19320	VCAM1	4
Q9H3D4	TP63	12	4079	LUSC		P51617	IRAK1	4
P00533	EGFR	43	4080	LUSC		P62136	PPP1CA	4
P06748	NPM1	51	4080	LUSC		Q04637	EIF4G1	4
P07900	HSP90AA1	10	4080	LUSC		Q9UQ80	PA2G4	4
P08238	HSP90AB1	19	4080	LUSC		P12956	XRCC6	3
P11021	HSPA5	11	4080	LUSC		P30101	PDIA3	3
P43243	MATR3	10	4080	LUSC		P43243	MATR3	3
P62140	PPP1CB	10	4080	LUSC		P46531	NOTCH1	3
P63104	YWHAZ	33	4080	LUSC		P51149	RAB7A	3
Q13509	TUBB4	21	4080	LUSC		P04626	ERBB2	2
Q9H3D4	TP63	16	4080	LUSC		P05067	APP	2
P07900	HSP90AA1	7	4081	LUSC		P36873	PPP1CC	2
P33993	MCM7	10	4081	LUSC		P38919	EIF4A3	2
P35579	MYH9	12	4081	LUSC		P45973	CBX5	2
P61981	YWHAG	5	4081	LUSC		P46940	IQGAP1	2
P62140	PPP1CB	8	4081	LUSC		P61160	ACTR2	2
P63104	YWHAZ	26	4081	LUSC		P62280	RPS11	2
Q04637	EIF4G1	5	4081	LUSC		P84022	SMAD3	2
Q9H3D4	TP63	7	4081	LUSC		Q15796	SMAD2	2
Q9NWT6	HIF1AN	5	4081	LUSC		Q9GZZ9	UBA5	2
Q9NZI8	IGF2BP1	6	4081	LUSC		O00716	E2F3	1
P04637	TP53	25	4587	LUSC		O75787	ATP6AP2	1
P08238	HSP90AB1	17	4587	LUSC		O95166	GABARAP	1
P11021	HSPA5	14	4587	LUSC		P01023	A2M	1
P45973	CBX5	14	4587	LUSC		P04637	TP53	1
P46531	NOTCH1	19	4587	LUSC		P05412	JUN	1
P51858	HDGF	15	4587	LUSC		P08473	MME	1
P63104	YWHAZ	32	4587	LUSC		P09651	HNRNPA1	1
P67809	YBX1	22	4587	LUSC		P0CG48	UBC	1
Q13509	TUBB4	20	4587	LUSC		P12004	PCNA	1
Q71U36	TUBA1A	18	4587	LUSC		P12830	CDH1	1
P00533	EGFR	28	4593	LUSC		P19838	NFKB1	1
P02751	FN1	51	4593	LUSC		P21246	PTN	1
P08238	HSP90AB1	19	4593	LUSC		P26641	EEF1G	1
P21333	FLNA	16	4593	LUSC		P27348	YWHAQ	1
P33993	MCM7	11	4593	LUSC		P29353	SHC1	1
P35579	MYH9	18	4593	LUSC		P42858	HTT	1
Q13509	TUBB4	15	4593	LUSC		P47755	CAPZA2	1
Q14103	HNRNPD	9	4593	LUSC		P57078	RIPK4	1
Q9H3D4	TP63	8	4593	LUSC		P61981	YWHAG	1
Q9UHB6	LIMA1	9	4593	LUSC		Q00613	HSF1	1
P02751	FN1	40	4609	LUSC		Q00987	MDM2	1
P04792	HSPB1	7	4609	LUSC		Q09472	EP300	1
P05067	APP	8	4609	LUSC		Q12873	CHD3	1
P07900	HSP90AA1	9	4609	LUSC		Q14240	EIF4A2	1
P11021	HSPA5	12	4609	LUSC		Q14683	SMC1A	1
P51149	RAB7A	7	4609	LUSC		Q96FW1	OTUB1	1
P63104	YWHAZ	24	4609	LUSC		Q9H0R8	GABARAPL1	1
Q16666	IFI16	7	4609	LUSC		Q9NWT6	HIF1AN	1
Q92597	NDRG1	9	4609	LUSC		Q9NZI8	IGF2BP1	1
Q9H3D4	TP63	7	4609	LUSC
O95758	ROD1	18	5040	LUSC
P00533	EGFR	46	5040	LUSC
P02751	FN1	54	5040	LUSC
P04626	ERBB2	22	5040	LUSC
P08238	HSP90AB1	16	5040	LUSC
P11021	HSPA5	16	5040	LUSC
P35579	MYH9	23	5040	LUSC
P63104	YWHAZ	36	5040	LUSC
Q9H0R8	GABARAPL1	54	5040	LUSC
Q9UHB6	LIMA1	20	5040	LUSC
O00567	NOP56	20	5471	LUSC
P04792	HSPB1	14	5471	LUSC
P06748	NPM1	36	5471	LUSC
P08238	HSP90AB1	15	5471	LUSC
P27635	RPL10	43	5471	LUSC
P51858	HDGF	16	5471	LUSC
P62136	PPP1CA	16	5471	LUSC
P63104	YWHAZ	36	5471	LUSC
Q9H3D4	TP63	14	5471	LUSC
Q9UQ80	PA2G4	12	5471	LUSC
P04792	HSPB1	6	5472	LUSC
P08238	HSP90AB1	12	5472	LUSC
P12956	XRCC6	6	5472	LUSC
P26641	EEF1G	5	5472	LUSC
P27635	RPL10	29	5472	LUSC
P51858	HDGF	9	5472	LUSC
P63104	YWHAZ	24	5472	LUSC
Q16666	IFI16	6	5472	LUSC
Q92597	NDRG1	9	5472	LUSC
Q9H3D4	TP63	7	5472	LUSC
P07900	HSP90AA1	12	5478	LUSC
P08238	HSP90AB1	14	5478	LUSC
P11021	HSPA5	14	5478	LUSC
P27348	YWHAQ	8	5478	LUSC
P51617	IRAK1	10	5478	LUSC
P63104	YWHAZ	40	5478	LUSC
P67809	YBX1	15	5478	LUSC
Q15796	SMAD2	8	5478	LUSC
Q71U36	TUBA1A	14	5478	LUSC
Q92597	NDRG1	8	5478	LUSC
O00567	NOP56	31	5481	LUSC
P01106	MYC	51	5481	LUSC
P06748	NPM1	47	5481	LUSC
P27635	RPL10	56	5481	LUSC
P51858	HDGF	23	5481	LUSC
P60709	ACTB	43	5481	LUSC
P63104	YWHAZ	38	5481	LUSC
P67809	YBX1	35	5481	LUSC
Q00839	HNRNPU	51	5481	LUSC
Q71U36	TUBA1A	29	5481	LUSC
O00567	NOP56	21	5482	LUSC
P04792	HSPB1	15	5482	LUSC
P06748	NPM1	42	5482	LUSC
P08238	HSP90AB1	15	5482	LUSC
P12004	PCNA	11	5482	LUSC
P51858	HDGF	11	5482	LUSC
P63104	YWHAZ	44	5482	LUSC
P67809	YBX1	22	5482	LUSC
Q92597	NDRG1	11	5482	LUSC
Q9H3D4	TP63	14	5482	LUSC
O00567	NOP56	10	5483	LUSC
P02751	FN1	66	5483	LUSC
P08238	HSP90AB1	13	5483	LUSC
P11021	HSPA5	16	5483	LUSC
P12830	CDH1	11	5483	LUSC
P51617	IRAK1	11	5483	LUSC
P51858	HDGF	17	5483	LUSC
P63104	YWHAZ	33	5483	LUSC
P67809	YBX1	28	5483	LUSC
Q71U36	TUBA1A	23	5483	LUSC
P02751	FN1	54	5489	LUSC
P06748	NPM1	34	5489	LUSC
P08238	HSP90AB1	23	5489	LUSC
P11021	HSPA5	19	5489	LUSC
P19320	VCAM1	115	5489	LUSC
P51858	HDGF	13	5489	LUSC
P60709	ACTB	28	5489	LUSC
P63104	YWHAZ	35	5489	LUSC
Q00839	HNRNPU	37	5489	LUSC
Q9H3D4	TP63	13	5489	LUSC
O00567	NOP56	23	5491	LUSC
O95758	ROD1	22	5491	LUSC
P01106	MYC	54	5491	LUSC
P06748	NPM1	36	5491	LUSC
P08238	HSP90AB1	16	5491	LUSC
P36873	PPP1CC	19	5491	LUSC
P51858	HDGF	16	5491	LUSC
P62136	PPP1CA	16	5491	LUSC
P63104	YWHAZ	43	5491	LUSC
P67809	YBX1	25	5491	LUSC
P04792	HSPB1	12	5670	LUSC
P06748	NPM1	34	5670	LUSC
P08238	HSP90AB1	16	5670	LUSC
P11021	HSPA5	13	5670	LUSC
P27635	RPL10	42	5670	LUSC
P51858	HDGF	12	5670	LUSC
P60709	ACTB	30	5670	LUSC
P63104	YWHAZ	41	5670	LUSC
Q13509	TUBB4	18	5670	LUSC
Q9UQ80	PA2G4	16	5670	LUSC
O00716	E2F3	16	6143	LUSC
P06748	NPM1	8	6143	LUSC
P07900	HSP90AA1	8	6143	LUSC
P33993	MCM7	12	6143	LUSC
P35579	MYH9	9	6143	LUSC
P43243	MATR3	17	6143	LUSC
P63104	YWHAZ	22	6143	LUSC
Q00839	HNRNPU	14	6143	LUSC
Q16666	IFI16	15	6143	LUSC
Q9H3D4	TP63	11	6143	LUSC
P02751	FN1	38	6647	LUSC
P08238	HSP90AB1	16	6647	LUSC
P11021	HSPA5	12	6647	LUSC
P21333	FLNA	21	6647	LUSC
P35579	MYH9	25	6647	LUSC
P60709	ACTB	15	6647	LUSC
P63104	YWHAZ	32	6647	LUSC
Q16659	MAPK6	16	6647	LUSC
Q9H3D4	TP63	8	6647	LUSC
Q9UHB6	LIMA1	12	6647	LUSC
P06748	NPM1	43	6737	LUSC
P08238	HSP90AB1	20	6737	LUSC
P11021	HSPA5	11	6737	LUSC
P27635	RPL10	52	6737	LUSC
P51858	HDGF	17	6737	LUSC
P60709	ACTB	40	6737	LUSC
P63104	YWHAZ	44	6737	LUSC
P67809	YBX1	22	6737	LUSC
Q00839	HNRNPU	42	6737	LUSC
Q92597	NDRG1	11	6737	LUSC
P00533	EGFR	50	6771	LUSC
P02751	FN1	75	6771	LUSC
P06748	NPM1	43	6771	LUSC
P35579	MYH9	18	6771	LUSC
P60709	ACTB	31	6771	LUSC
P63104	YWHAZ	42	6771	LUSC
Q00987	MDM2	15	6771	LUSC
Q16659	MAPK6	22	6771	LUSC
Q96FW1	OTUB1	52	6771	LUSC
Q9UHB6	LIMA1	16	6771	LUSC
O00567	NOP56	25	6773	LUSC
P06748	NPM1	49	6773	LUSC
P08238	HSP90AB1	13	6773	LUSC
P60709	ACTB	29	6773	LUSC
P62280	RPS11	8	6773	LUSC
P63104	YWHAZ	29	6773	LUSC
P84022	SMAD3	8	6773	LUSC
Q9GZZ9	UBA5	9	6773	LUSC
Q9H3D4	TP63	12	6773	LUSC
Q9UQ80	PA2G4	12	6773	LUSC
P04792	HSPB1	13	6837	LUSC
P08238	HSP90AB1	14	6837	LUSC
P11021	HSPA5	14	6837	LUSC
P27635	RPL10	20	6837	LUSC
P46940	IQGAP1	12	6837	LUSC
P51149	RAB7A	11	6837	LUSC
P51858	HDGF	11	6837	LUSC
P60709	ACTB	25	6837	LUSC
P63104	YWHAZ	37	6837	LUSC
P67809	YBX1	18	6837	LUSC
O95758	ROD1	21	7107	LUSC
P04792	HSPB1	11	7107	LUSC
P08238	HSP90AB1	17	7107	LUSC
P09651	HNRNPA1	12	7107	LUSC
P33993	MCM7	12	7107	LUSC
P51858	HDGF	15	7107	LUSC
P63104	YWHAZ	41	7107	LUSC
Q00839	HNRNPU	27	7107	LUSC
Q92597	NDRG1	12	7107	LUSC
Q9H3D4	TP63	13	7107	LUSC
O95758	ROD1	31	7138	LUSC
P00533	EGFR	53	7138	LUSC
P01106	MYC	57	7138	LUSC
P06748	NPM1	36	7138	LUSC
P11021	HSPA5	17	7138	LUSC
P27635	RPL10	42	7138	LUSC
P51858	HDGF	20	7138	LUSC
P60709	ACTB	34	7138	LUSC
P63104	YWHAZ	48	7138	LUSC
Q00839	HNRNPU	39	7138	LUSC
P04792	HSPB1	13	7142	LUSC
P06748	NPM1	37	7142	LUSC
P08238	HSP90AB1	19	7142	LUSC
P27635	RPL10	49	7142	LUSC
P43243	MATR3	12	7142	LUSC
P63104	YWHAZ	48	7142	LUSC
P67809	YBX1	34	7142	LUSC
Q00839	HNRNPU	41	7142	LUSC
Q16666	IFI16	15	7142	LUSC
Q9H3D4	TP63	17	7142	LUSC
O95758	ROD1	20	7222	LUSC
P00533	EGFR	39	7222	LUSC
P02751	FN1	54	7222	LUSC
P08238	HSP90AB1	15	7222	LUSC
P11021	HSPA5	12	7222	LUSC
P35579	MYH9	13	7222	LUSC
P51617	IRAK1	11	7222	LUSC
P63104	YWHAZ	36	7222	LUSC
P67809	YBX1	21	7222	LUSC
Q16659	MAPK6	21	7222	LUSC
P02751	FN1	37	7335	LUSC
P04792	HSPB1	10	7335	LUSC
P08238	HSP90AB1	12	7335	LUSC
P11021	HSPA5	11	7335	LUSC
P19320	VCAM1	72	7335	LUSC
P35579	MYH9	16	7335	LUSC
P60709	ACTB	19	7335	LUSC
P63104	YWHAZ	32	7335	LUSC
Q00839	HNRNPU	15	7335	LUSC
Q9H3D4	TP63	10	7335	LUSC
O95758	ROD1	27	7337	LUSC
P01106	MYC	59	7337	LUSC
P02751	FN1	68	7337	LUSC
P06748	NPM1	20	7337	LUSC
P08238	HSP90AB1	21	7337	LUSC
P11021	HSPA5	20	7337	LUSC
P60709	ACTB	24	7337	LUSC
P63104	YWHAZ	44	7337	LUSC
Q00839	HNRNPU	19	7337	LUSC
Q16666	IFI16	16	7337	LUSC
P00533	EGFR	46	7338	LUSC
P02751	FN1	38	7338	LUSC
P04792	HSPB1	10	7338	LUSC
P05067	APP	10	7338	LUSC
P07900	HSP90AA1	11	7338	LUSC
P08238	HSP90AB1	14	7338	LUSC
P11021	HSPA5	15	7338	LUSC
P63104	YWHAZ	33	7338	LUSC
Q16659	MAPK6	22	7338	LUSC
Q16666	IFI16	11	7338	LUSC
P02751	FN1	62	7340	LUSC
P08238	HSP90AB1	17	7340	LUSC
P11021	HSPA5	13	7340	LUSC
P51858	HDGF	14	7340	LUSC
P60709	ACTB	27	7340	LUSC
P62136	PPP1CA	13	7340	LUSC
P63104	YWHAZ	40	7340	LUSC
P67809	YBX1	17	7340	LUSC
Q00839	HNRNPU	43	7340	LUSC
Q92597	NDRG1	13	7340	LUSC
P07900	HSP90AA1	8	7579	LUSC
P08238	HSP90AB1	11	7579	LUSC
P11021	HSPA5	13	7579	LUSC
P38919	EIF4A3	8	7579	LUSC
P62136	PPP1CA	7	7579	LUSC
P63104	YWHAZ	22	7579	LUSC
P84022	SMAD3	8	7579	LUSC
Q04637	EIF4G1	7	7579	LUSC
Q9GZZ9	UBA5	6	7579	LUSC
Q9H3D4	TP63	6	7579	LUSC
O00567	NOP56	24	7580	LUSC
P06748	NPM1	47	7580	LUSC
P07900	HSP90AA1	10	7580	LUSC
P08238	HSP90AB1	12	7580	LUSC
P63104	YWHAZ	30	7580	LUSC
P67809	YBX1	29	7580	LUSC
Q14103	HNRNPD	12	7580	LUSC
Q16666	IFI16	14	7580	LUSC
Q92597	NDRG1	10	7580	LUSC
Q9H3D4	TP63	15	7580	LUSC
O95758	ROD1	23	7582	LUSC
P00533	EGFR	51	7582	LUSC
P06748	NPM1	23	7582	LUSC
P07900	HSP90AA1	12	7582	LUSC
P08238	HSP90AB1	18	7582	LUSC
P62140	PPP1CB	12	7582	LUSC
P63104	YWHAZ	36	7582	LUSC
Q13509	TUBB4	18	7582	LUSC
Q16659	MAPK6	30	7582	LUSC
Q9H3D4	TP63	12	7582	LUSC
P00533	EGFR	39	7657	LUSC
P06748	NPM1	32	7657	LUSC
P08238	HSP90AB1	18	7657	LUSC
P08473	MME	11	7657	LUSC
P11021	HSPA5	14	7657	LUSC
P33993	MCM7	10	7657	LUSC
P63104	YWHAZ	29	7657	LUSC
Q00613	HSF1	8	7657	LUSC
Q92597	NDRG1	9	7657	LUSC
Q9H3D4	TP63	11	7657	LUSC
P11021	HSPA5	13	7658	LUSC
P45973	CBX5	12	7658	LUSC
P46531	NOTCH1	16	7658	LUSC
P63104	YWHAZ	24	7658	LUSC
P67809	YBX1	25	7658	LUSC
Q00839	HNRNPU	16	7658	LUSC
Q13509	TUBB4	18	7658	LUSC
Q14103	HNRNPD	14	7658	LUSC
Q16666	IFI16	17	7658	LUSC
Q71U36	TUBA1A	18	7658	LUSC
P00533	EGFR	48	7710	LUSC
P02751	FN1	47	7710	LUSC
P04626	ERBB2	15	7710	LUSC
P33993	MCM7	18	7710	LUSC
P35579	MYH9	20	7710	LUSC
P62140	PPP1CB	17	7710	LUSC
P63104	YWHAZ	40	7710	LUSC
P67809	YBX1	16	7710	LUSC
Q16659	MAPK6	25	7710	LUSC
Q9UHB6	LIMA1	13	7710	LUSC
P07900	HSP90AA1	8	7730	LUSC
P08238	HSP90AB1	14	7730	LUSC
P11021	HSPA5	11	7730	LUSC
P33993	MCM7	6	7730	LUSC
P62140	PPP1CB	6	7730	LUSC
P63104	YWHAZ	30	7730	LUSC
Q14240	EIF4A2	6	7730	LUSC
Q15796	SMAD2	9	7730	LUSC
Q9H3D4	TP63	14	7730	LUSC
Q9UQ80	PA2G4	7	7730	LUSC
P08238	HSP90AB1	15	7731	LUSC
P11021	HSPA5	9	7731	LUSC
P12956	XRCC6	7	7731	LUSC
P21246	PTN	7	7731	LUSC
P30101	PDIA3	9	7731	LUSC
P35579	MYH9	13	7731	LUSC
P63104	YWHAZ	24	7731	LUSC
P67809	YBX1	15	7731	LUSC
Q92597	NDRG1	7	7731	LUSC
Q9H3D4	TP63	11	7731	LUSC
P02751	FN1	65	7767	LUSC
P06748	NPM1	36	7767	LUSC
P08238	HSP90AB1	19	7767	LUSC
P11021	HSPA5	17	7767	LUSC
P19320	VCAM1	129	7767	LUSC
P36873	PPP1CC	23	7767	LUSC
P51858	HDGF	21	7767	LUSC
P63104	YWHAZ	42	7767	LUSC
P67809	YBX1	25	7767	LUSC
Q00839	HNRNPU	42	7767	LUSC
P02751	FN1	49	8007	LUSC
P07900	HSP90AA1	17	8007	LUSC
P08238	HSP90AB1	20	8007	LUSC
P21333	FLNA	19	8007	LUSC
P33993	MCM7	13	8007	LUSC
P35579	MYH9	21	8007	LUSC
P42858	HTT	11	8007	LUSC
P47755	CAPZA2	15	8007	LUSC
P63104	YWHAZ	32	8007	LUSC
Q13509	TUBB4	25	8007	LUSC
O75787	ATP6AP2	9	8008	LUSC
P00533	EGFR	30	8008	LUSC
P02751	FN1	35	8008	LUSC
P21333	FLNA	15	8008	LUSC
P29353	SHC1	10	8008	LUSC
P30101	PDIA3	11	8008	LUSC
P35579	MYH9	21	8008	LUSC
P46940	IQGAP1	10	8008	LUSC
P63104	YWHAZ	31	8008	LUSC
P67809	YBX1	9	8008	LUSC
P12956	XRCC6	6	8082	LUSC
P30101	PDIA3	6	8082	LUSC
P46531	NOTCH1	7	8082	LUSC
P51149	RAB7A	5	8082	LUSC
P63104	YWHAZ	18	8082	LUSC
P67809	YBX1	13	8082	LUSC
Q04637	EIF4G1	4	8082	LUSC
Q12873	CHD3	4	8082	LUSC
Q92597	NDRG1	4	8082	LUSC
Q9H3D4	TP63	8	8082	LUSC
P07900	HSP90AA1	6	8083	LUSC
P08238	HSP90AB1	12	8083	LUSC
P11021	HSPA5	10	8083	LUSC
P61160	ACTR2	6	8083	LUSC
P62280	RPS11	5	8083	LUSC
Q00839	HNRNPU	20	8083	LUSC
Q04637	EIF4G1	6	8083	LUSC
Q09472	EP300	6	8083	LUSC
Q14103	HNRNPD	9	8083	LUSC
Q14683	SMC1A	5	8083	LUSC
P02751	FN1	76	8201	LUSC
P06748	NPM1	35	8201	LUSC
P08238	HSP90AB1	25	8201	LUSC
P27635	RPL10	45	8201	LUSC
P35579	MYH9	20	8201	LUSC
P38919	EIF4A3	26	8201	LUSC
P51858	HDGF	18	8201	LUSC
P60709	ACTB	35	8201	LUSC
P63104	YWHAZ	52	8201	LUSC
P67809	YBX1	26	8201	LUSC
P02751	FN1	30	8309	LUSC
P11021	HSPA5	18	8309	LUSC
P19320	VCAM1	45	8309	LUSC
P19838	NFKB1	24	8309	LUSC
P35579	MYH9	11	8309	LUSC
P57078	RIPK4	12	8309	LUSC
P63104	YWHAZ	27	8309	LUSC
Q00839	HNRNPU	8	8309	LUSC
Q14103	HNRNPD	8	8309	LUSC
Q92597	NDRG1	10	8309	LUSC
P00533	EGFR	51	8386	LUSC
P01106	MYC	45	8386	LUSC
P02751	FN1	52	8386	LUSC
P08238	HSP90AB1	19	8386	LUSC
P21333	FLNA	22	8386	LUSC
P33993	MCM7	16	8386	LUSC
P35579	MYH9	24	8386	LUSC
P63104	YWHAZ	39	8386	LUSC
P67809	YBX1	14	8386	LUSC
Q9UHB6	LIMA1	20	8386	LUSC
O95758	ROD1	15	8454	LUSC
P07900	HSP90AA1	9	8454	LUSC
P08238	HSP90AB1	12	8454	LUSC
P11021	HSPA5	9	8454	LUSC
P51858	HDGF	8	8454	LUSC
P63104	YWHAZ	30	8454	LUSC
Q00839	HNRNPU	12	8454	LUSC
Q16666	IFI16	11	8454	LUSC
Q92597	NDRG1	8	8454	LUSC
Q9H3D4	TP63	6	8454	LUSC
O95166	GABARAP	58	8623	LUSC
P01023	A2M	9	8623	LUSC
P01106	MYC	25	8623	LUSC
P05412	JUN	86	8623	LUSC
P08238	HSP90AB1	15	8623	LUSC
P0CG48	UBC	10	8623	LUSC
P27635	RPL10	41	8623	LUSC
P60709	ACTB	28	8623	LUSC
P63104	YWHAZ	22	8623	LUSC
P67809	YBX1	13	8623	LUSC

## Sheet: LIHC
Target Uniprotkb	Target Genesymbol	Connections	Patient	Tissue		Target Uniprotkb	Target Genesymbol	N patients LIHC
P04626	ERBB2	22	A10Q	LIHC		P08238	HSP90AB1	41
P21333	FLNA	29	A10Q	LIHC		P04792	HSPB1	28
P35579	MYH9	36	A10Q	LIHC		P35579	MYH9	27
P47755	CAPZA2	24	A10Q	LIHC		P60709	ACTB	24
P56945	BCAR1	26	A10Q	LIHC		P63104	YWHAZ	21
P60709	ACTB	22	A10Q	LIHC		P11021	HSPA5	20
P63104	YWHAZ	36	A10Q	LIHC		P02751	FN1	18
Q16643	DBN1	27	A10Q	LIHC		P06748	NPM1	18
Q8N3V7	SYNPO	27	A10Q	LIHC		P07900	HSP90AA1	18
Q92614	MYO18A	25	A10Q	LIHC		P27635	RPL10	18
O75787	ATP6AP2	9	A10R	LIHC		Q00839	HNRNPU	16
P02751	FN1	32	A10R	LIHC		P67809	YBX1	13
P04792	HSPB1	14	A10R	LIHC		P21333	FLNA	12
P08238	HSP90AB1	13	A10R	LIHC		P04626	ERBB2	11
P11021	HSPA5	11	A10R	LIHC		P21860	ERBB3	8
P21333	FLNA	11	A10R	LIHC		P30101	PDIA3	7
P30101	PDIA3	7	A10R	LIHC		Q8N3V7	SYNPO	7
P35579	MYH9	15	A10R	LIHC		Q92597	NDRG1	7
P60709	ACTB	11	A10R	LIHC		O95166	GABARAP	6
Q8N3V7	SYNPO	10	A10R	LIHC		P05067	APP	6
O75787	ATP6AP2	8	A10T	LIHC		P51858	HDGF	6
P02751	FN1	34	A10T	LIHC		P01023	A2M	5
P04792	HSPB1	13	A10T	LIHC		P0CG48	UBC	5
P08238	HSP90AB1	14	A10T	LIHC		P27824	CANX	5
P21333	FLNA	11	A10T	LIHC		O75787	ATP6AP2	3
P30101	PDIA3	8	A10T	LIHC		P01106	MYC	3
P35579	MYH9	15	A10T	LIHC		P02768	ALB	3
P60709	ACTB	9	A10T	LIHC		P05412	JUN	3
Q8N3V7	SYNPO	10	A10T	LIHC		P08473	MME	3
Q9UH99	SUN2	6	A10T	LIHC		P33993	MCM7	3
P04062	GBA	6	A10U	LIHC		P35222	CTNNB1	3
P08238	HSP90AB1	17	A10U	LIHC		P42858	HTT	3
P21860	ERBB3	6	A10U	LIHC		P51617	IRAK1	3
P27635	RPL10	12	A10U	LIHC		P62993	GRB2	3
P35579	MYH9	13	A10U	LIHC		Q13418	ILK	3
P51617	IRAK1	7	A10U	LIHC		Q13501	SQSTM1	3
P60709	ACTB	13	A10U	LIHC		Q15843	NEDD8	3
P62993	GRB2	32	A10U	LIHC		Q9H0R8	GABARAPL1	3
Q92542	NCSTN	7	A10U	LIHC		O00567	NOP56	2
Q9Y6K9	IKBKG	5	A10U	LIHC		O95793	STAU1	2
P02751	FN1	45	A10W	LIHC		P08670	VIM	2
P06748	NPM1	9	A10W	LIHC		P19320	VCAM1	2
P07900	HSP90AA1	15	A10W	LIHC		P31749	AKT1	2
P08238	HSP90AB1	16	A10W	LIHC		P43243	MATR3	2
P11021	HSPA5	11	A10W	LIHC		P46379	BAT3	2
P21860	ERBB3	10	A10W	LIHC		P56945	BCAR1	2
P35579	MYH9	14	A10W	LIHC		P62136	PPP1CA	2
P63104	YWHAZ	24	A10W	LIHC		P62280	RPS11	2
P67809	YBX1	13	A10W	LIHC		P84022	SMAD3	2
Q99523	SORT1	9	A10W	LIHC		Q00987	MDM2	2
P01106	MYC	23	A10X	LIHC		Q14240	EIF4A2	2
P02751	FN1	37	A10X	LIHC		Q16543	CDC37	2
P05067	APP	7	A10X	LIHC		Q16643	DBN1	2
P05412	JUN	71	A10X	LIHC		Q7KZF4	SND1	2
P08238	HSP90AB1	16	A10X	LIHC		Q92542	NCSTN	2
P0CG48	UBC	8	A10X	LIHC		Q92614	MYO18A	2
P21333	FLNA	12	A10X	LIHC		Q96CV9	OPTN	2
P27635	RPL10	22	A10X	LIHC		Q99523	SORT1	2
P35579	MYH9	18	A10X	LIHC		Q9P0L0	VAPA	2
P60709	ACTB	21	A10X	LIHC		Q9UH99	SUN2	2
O14818	PSMA7	3	A10Y	LIHC		O00159	MYO1C	1
P04183	TK1	4	A10Y	LIHC		O14818	PSMA7	1
P04406	GAPDH	4	A10Y	LIHC		P00441	SOD1	1
P04792	HSPB1	8	A10Y	LIHC		P00519	ABL1	1
P11021	HSPA5	6	A10Y	LIHC		P00533	EGFR	1
P14625	HSP90B1	3	A10Y	LIHC		P00738	HP	1
P16152	CBR1	3	A10Y	LIHC		P02647	APOA1	1
P27824	CANX	4	A10Y	LIHC		P02671	FGA	1
P30101	PDIA3	5	A10Y	LIHC		P02745	C1QA	1
Q14240	EIF4A2	3	A10Y	LIHC		P02787	TF	1
P01023	A2M	9	A10Z	LIHC		P04062	GBA	1
P02751	FN1	32	A10Z	LIHC		P04183	TK1	1
P08238	HSP90AB1	10	A10Z	LIHC		P04406	GAPDH	1
P11021	HSPA5	8	A10Z	LIHC		P05141	SLC25A5	1
P35579	MYH9	10	A10Z	LIHC		P09651	HNRNPA1	1
P42858	HTT	11	A10Z	LIHC		P12004	PCNA	1
P46379	BAT3	7	A10Z	LIHC		P12830	CDH1	1
Q14240	EIF4A2	7	A10Z	LIHC		P12931	SRC	1
Q92614	MYO18A	6	A10Z	LIHC		P13010	XRCC5	1
Q9UMX0	UBQLN1	7	A10Z	LIHC		P13569	CFTR	1
P01023	A2M	6	A110	LIHC		P14625	HSP90B1	1
P04792	HSPB1	7	A110	LIHC		P16152	CBR1	1
P05067	APP	8	A110	LIHC		P17861	XBP1	1
P08238	HSP90AB1	15	A110	LIHC		P18827	SDC1	1
P08670	VIM	6	A110	LIHC		P24539	ATP5F1	1
P21333	FLNA	11	A110	LIHC		P24863	CCNC	1
P27635	RPL10	46	A110	LIHC		P29692	EEF1D	1
P35579	MYH9	14	A110	LIHC		P30153	PPP2R1A	1
P60709	ACTB	28	A110	LIHC		P30154	PPP2R1B	1
P62280	RPS11	8	A110	LIHC		P31946	YWHAB	1
P00533	EGFR	43	A113	LIHC		P34741	SDC2	1
P01023	A2M	9	A113	LIHC		P42224	STAT1	1
P04626	ERBB2	18	A113	LIHC		P46937	YAP1	1
P04792	HSPB1	10	A113	LIHC		P47755	CAPZA2	1
P06748	NPM1	12	A113	LIHC		P49715	CEBPA	1
P08238	HSP90AB1	13	A113	LIHC		P51149	RAB7A	1
P21860	ERBB3	10	A113	LIHC		P56556	NDUFA6	1
P61981	YWHAG	9	A113	LIHC		P60900	PSMA6	1
P63104	YWHAZ	38	A113	LIHC		P61981	YWHAG	1
Q00839	HNRNPU	21	A113	LIHC		P63092	GNAS	1
P07900	HSP90AA1	13	A114	LIHC		P63244	GNB2L1	1
P08238	HSP90AB1	20	A114	LIHC		Q00610	CLTC	1
P21333	FLNA	16	A114	LIHC		Q04917	YWHAH	1
P27635	RPL10	14	A114	LIHC		Q08050	FOXM1	1
P33993	MCM7	12	A114	LIHC		Q15796	SMAD2	1
P35579	MYH9	19	A114	LIHC		Q16659	MAPK6	1
P60709	ACTB	21	A114	LIHC		Q16795	NDUFA9	1
P63104	YWHAZ	31	A114	LIHC		Q71U36	TUBA1A	1
Q00839	HNRNPU	14	A114	LIHC		Q92734	TFG	1
Q92597	NDRG1	9	A114	LIHC		Q92841	DDX17	1
P04792	HSPB1	15	A116	LIHC		Q96HR9	REEP6	1
P06748	NPM1	32	A116	LIHC		Q99442	SEC62	1
P07900	HSP90AA1	11	A116	LIHC		Q9NYU2	UGGT1	1
P08238	HSP90AB1	16	A116	LIHC		Q9UHX1	PUF60	1
P08473	MME	11	A116	LIHC		Q9UKR5	C14orf1	1
P0CG48	UBC	11	A116	LIHC		Q9UMX0	UBQLN1	1
P27635	RPL10	39	A116	LIHC		Q9Y6K9	IKBKG	1
P60709	ACTB	33	A116	LIHC
P63104	YWHAZ	32	A116	LIHC
Q15843	NEDD8	19	A116	LIHC
P00441	SOD1	3	A118	LIHC
P00738	HP	3	A118	LIHC
P02647	APOA1	7	A118	LIHC
P02671	FGA	3	A118	LIHC
P02745	C1QA	4	A118	LIHC
P02768	ALB	12	A118	LIHC
P02787	TF	4	A118	LIHC
P34741	SDC2	3	A118	LIHC
Q96HR9	REEP6	2	A118	LIHC
Q99442	SEC62	2	A118	LIHC
P04792	HSPB1	16	A119	LIHC
P06748	NPM1	57	A119	LIHC
P08238	HSP90AB1	19	A119	LIHC
P27635	RPL10	67	A119	LIHC
P51858	HDGF	20	A119	LIHC
P60709	ACTB	50	A119	LIHC
P63104	YWHAZ	35	A119	LIHC
P67809	YBX1	25	A119	LIHC
Q15843	NEDD8	30	A119	LIHC
Q9P0L0	VAPA	22	A119	LIHC
P02768	ALB	8	A11A	LIHC
P04626	ERBB2	17	A11A	LIHC
P04792	HSPB1	12	A11A	LIHC
P05412	JUN	91	A11A	LIHC
P07900	HSP90AA1	12	A11A	LIHC
P08238	HSP90AB1	14	A11A	LIHC
P19320	VCAM1	69	A11A	LIHC
P24863	CCNC	7	A11A	LIHC
P35579	MYH9	12	A11A	LIHC
Q00839	HNRNPU	8	A11A	LIHC
P05067	APP	5	A11B	LIHC
P07900	HSP90AA1	6	A11B	LIHC
P08238	HSP90AB1	8	A11B	LIHC
P17861	XBP1	3	A11B	LIHC
P18827	SDC1	3	A11B	LIHC
P30154	PPP2R1B	3	A11B	LIHC
P63092	GNAS	3	A11B	LIHC
Q00839	HNRNPU	3	A11B	LIHC
Q00987	MDM2	5	A11B	LIHC
Q92734	TFG	2	A11B	LIHC
P02751	FN1	23	A11C	LIHC
P04626	ERBB2	10	A11C	LIHC
P08238	HSP90AB1	7	A11C	LIHC
P11021	HSPA5	16	A11C	LIHC
P21860	ERBB3	9	A11C	LIHC
P31946	YWHAB	6	A11C	LIHC
P35579	MYH9	11	A11C	LIHC
P42224	STAT1	6	A11C	LIHC
P51858	HDGF	7	A11C	LIHC
Q00839	HNRNPU	6	A11C	LIHC
P02751	FN1	32	A11D	LIHC
P04626	ERBB2	14	A11D	LIHC
P04792	HSPB1	7	A11D	LIHC
P08238	HSP90AB1	9	A11D	LIHC
P11021	HSPA5	14	A11D	LIHC
P35579	MYH9	15	A11D	LIHC
Q04917	YWHAH	6	A11D	LIHC
Q8N3V7	SYNPO	12	A11D	LIHC
Q99523	SORT1	5	A11D	LIHC
Q9UH99	SUN2	5	A11D	LIHC
P02751	FN1	11	A12J	LIHC
P04792	HSPB1	7	A12J	LIHC
P08238	HSP90AB1	11	A12J	LIHC
P08473	MME	8	A12J	LIHC
P27635	RPL10	9	A12J	LIHC
P35222	CTNNB1	8	A12J	LIHC
P84022	SMAD3	6	A12J	LIHC
Q00839	HNRNPU	7	A12J	LIHC
Q92597	NDRG1	8	A12J	LIHC
Q9UHX1	PUF60	4	A12J	LIHC
P04626	ERBB2	17	A1EB	LIHC
P04792	HSPB1	8	A1EB	LIHC
P08238	HSP90AB1	14	A1EB	LIHC
P11021	HSPA5	12	A1EB	LIHC
P21860	ERBB3	7	A1EB	LIHC
P30101	PDIA3	9	A1EB	LIHC
P35579	MYH9	10	A1EB	LIHC
P60709	ACTB	15	A1EB	LIHC
Q92542	NCSTN	7	A1EB	LIHC
Q96CV9	OPTN	6	A1EB	LIHC
P04626	ERBB2	19	A1EC	LIHC
P07900	HSP90AA1	6	A1EC	LIHC
P08238	HSP90AB1	13	A1EC	LIHC
P51617	IRAK1	8	A1EC	LIHC
P56945	BCAR1	26	A1EC	LIHC
P60709	ACTB	22	A1EC	LIHC
P63104	YWHAZ	32	A1EC	LIHC
Q00610	CLTC	7	A1EC	LIHC
Q15796	SMAD2	8	A1EC	LIHC
Q9H0R8	GABARAPL1	55	A1EC	LIHC
P04792	HSPB1	10	A1EE	LIHC
P06748	NPM1	10	A1EE	LIHC
P07900	HSP90AA1	16	A1EE	LIHC
P08238	HSP90AB1	14	A1EE	LIHC
P27635	RPL10	14	A1EE	LIHC
P42858	HTT	16	A1EE	LIHC
P63104	YWHAZ	32	A1EE	LIHC
Q00839	HNRNPU	13	A1EE	LIHC
Q8N3V7	SYNPO	12	A1EE	LIHC
Q92597	NDRG1	8	A1EE	LIHC
P02751	FN1	56	A1EG	LIHC
P08238	HSP90AB1	19	A1EG	LIHC
P11021	HSPA5	17	A1EG	LIHC
P21333	FLNA	17	A1EG	LIHC
P35579	MYH9	19	A1EG	LIHC
P42858	HTT	22	A1EG	LIHC
P60709	ACTB	25	A1EG	LIHC
P63104	YWHAZ	36	A1EG	LIHC
P67809	YBX1	17	A1EG	LIHC
Q00839	HNRNPU	18	A1EG	LIHC
P04792	HSPB1	10	A1EH	LIHC
P07900	HSP90AA1	9	A1EH	LIHC
P08238	HSP90AB1	16	A1EH	LIHC
P11021	HSPA5	13	A1EH	LIHC
P21333	FLNA	14	A1EH	LIHC
P21860	ERBB3	10	A1EH	LIHC
P30101	PDIA3	8	A1EH	LIHC
P35579	MYH9	17	A1EH	LIHC
P63104	YWHAZ	29	A1EH	LIHC
Q00839	HNRNPU	14	A1EH	LIHC
P04792	HSPB1	13	A1EI	LIHC
P05067	APP	11	A1EI	LIHC
P06748	NPM1	26	A1EI	LIHC
P07900	HSP90AA1	10	A1EI	LIHC
P08238	HSP90AB1	13	A1EI	LIHC
P35579	MYH9	18	A1EI	LIHC
P60709	ACTB	29	A1EI	LIHC
P63104	YWHAZ	33	A1EI	LIHC
P67809	YBX1	21	A1EI	LIHC
Q8N3V7	SYNPO	14	A1EI	LIHC
O95793	STAU1	13	A1EJ	LIHC
P04792	HSPB1	11	A1EJ	LIHC
P06748	NPM1	37	A1EJ	LIHC
P07900	HSP90AA1	9	A1EJ	LIHC
P08238	HSP90AB1	17	A1EJ	LIHC
P11021	HSPA5	9	A1EJ	LIHC
P27635	RPL10	44	A1EJ	LIHC
P67809	YBX1	21	A1EJ	LIHC
Q00839	HNRNPU	37	A1EJ	LIHC
Q92597	NDRG1	10	A1EJ	LIHC
O00567	NOP56	23	A1EL	LIHC
P06748	NPM1	41	A1EL	LIHC
P08238	HSP90AB1	29	A1EL	LIHC
P27635	RPL10	48	A1EL	LIHC
P35579	MYH9	21	A1EL	LIHC
P51858	HDGF	23	A1EL	LIHC
P60709	ACTB	40	A1EL	LIHC
P63104	YWHAZ	46	A1EL	LIHC
P67809	YBX1	36	A1EL	LIHC
Q00839	HNRNPU	42	A1EL	LIHC
P02751	FN1	24	A216	LIHC
P04792	HSPB1	6	A216	LIHC
P13010	XRCC5	4	A216	LIHC
P31749	AKT1	6	A216	LIHC
P33993	MCM7	6	A216	LIHC
P49715	CEBPA	4	A216	LIHC
P63244	GNB2L1	5	A216	LIHC
Q00839	HNRNPU	23	A216	LIHC
Q08050	FOXM1	4	A216	LIHC
Q92597	NDRG1	9	A216	LIHC
O95793	STAU1	9	A23B	LIHC
P02751	FN1	22	A23B	LIHC
P08238	HSP90AB1	11	A23B	LIHC
P19320	VCAM1	49	A23B	LIHC
P35579	MYH9	8	A23B	LIHC
P51858	HDGF	7	A23B	LIHC
P62993	GRB2	29	A23B	LIHC
Q00839	HNRNPU	19	A23B	LIHC
Q16659	MAPK6	13	A23B	LIHC
Q92597	NDRG1	7	A23B	LIHC
P06748	NPM1	6	A26S	LIHC
P08238	HSP90AB1	4	A26S	LIHC
P09651	HNRNPA1	6	A26S	LIHC
P35222	CTNNB1	6	A26S	LIHC
P46937	YAP1	4	A26S	LIHC
P84022	SMAD3	4	A26S	LIHC
Q00839	HNRNPU	10	A26S	LIHC
Q13501	SQSTM1	3	A26S	LIHC
Q7KZF4	SND1	2	A26S	LIHC
Q92841	DDX17	3	A26S	LIHC
O95166	GABARAP	104	A2HT	LIHC
P01023	A2M	16	A2HT	LIHC
P04792	HSPB1	16	A2HT	LIHC
P06748	NPM1	43	A2HT	LIHC
P08238	HSP90AB1	23	A2HT	LIHC
P27635	RPL10	50	A2HT	LIHC
P56556	NDUFA6	15	A2HT	LIHC
P60709	ACTB	41	A2HT	LIHC
P62136	PPP1CA	17	A2HT	LIHC
Q16543	CDC37	15	A2HT	LIHC
P02751	FN1	29	A2L6	LIHC
P04626	ERBB2	14	A2L6	LIHC
P04792	HSPB1	9	A2L6	LIHC
P11021	HSPA5	8	A2L6	LIHC
P12830	CDH1	7	A2L6	LIHC
P30101	PDIA3	5	A2L6	LIHC
P30153	PPP2R1A	6	A2L6	LIHC
P31749	AKT1	8	A2L6	LIHC
P33993	MCM7	6	A2L6	LIHC
Q9UKR5	C14orf1	5	A2L6	LIHC
O95166	GABARAP	99	A2QR	LIHC
P01106	MYC	62	A2QR	LIHC
P02751	FN1	64	A2QR	LIHC
P04626	ERBB2	29	A2QR	LIHC
P05412	JUN	168	A2QR	LIHC
P11021	HSPA5	21	A2QR	LIHC
P35579	MYH9	25	A2QR	LIHC
P60709	ACTB	42	A2QR	LIHC
P63104	YWHAZ	46	A2QR	LIHC
Q9H0R8	GABARAPL1	125	A2QR	LIHC
O00567	NOP56	32	A39V	LIHC
O95166	GABARAP	107	A39V	LIHC
P06748	NPM1	62	A39V	LIHC
P08238	HSP90AB1	23	A39V	LIHC
P27635	RPL10	69	A39V	LIHC
P51858	HDGF	21	A39V	LIHC
P60709	ACTB	50	A39V	LIHC
P67809	YBX1	25	A39V	LIHC
Q00839	HNRNPU	60	A39V	LIHC
Q15843	NEDD8	33	A39V	LIHC
P02751	FN1	21	A39W	LIHC
P04792	HSPB1	12	A39W	LIHC
P06748	NPM1	18	A39W	LIHC
P07900	HSP90AA1	8	A39W	LIHC
P08238	HSP90AB1	15	A39W	LIHC
P12931	SRC	10	A39W	LIHC
P21860	ERBB3	8	A39W	LIHC
P35579	MYH9	7	A39W	LIHC
P43243	MATR3	6	A39W	LIHC
Q00839	HNRNPU	16	A39W	LIHC
O95166	GABARAP	113	A39X	LIHC
P01106	MYC	55	A39X	LIHC
P06748	NPM1	56	A39X	LIHC
P07900	HSP90AA1	15	A39X	LIHC
P08238	HSP90AB1	23	A39X	LIHC
P27635	RPL10	60	A39X	LIHC
P51858	HDGF	20	A39X	LIHC
P60709	ACTB	49	A39X	LIHC
P63104	YWHAZ	42	A39X	LIHC
P67809	YBX1	26	A39X	LIHC
O95166	GABARAP	86	A39Z	LIHC
P08238	HSP90AB1	14	A39Z	LIHC
P11021	HSPA5	9	A39Z	LIHC
P21860	ERBB3	9	A39Z	LIHC
P27635	RPL10	60	A39Z	LIHC
P30101	PDIA3	9	A39Z	LIHC
P46379	BAT3	9	A39Z	LIHC
P60709	ACTB	37	A39Z	LIHC
P62280	RPS11	9	A39Z	LIHC
P67809	YBX1	19	A39Z	LIHC
P02751	FN1	31	A3A1	LIHC
P04792	HSPB1	7	A3A1	LIHC
P07900	HSP90AA1	9	A3A1	LIHC
P08238	HSP90AB1	9	A3A1	LIHC
P0CG48	UBC	6	A3A1	LIHC
P11021	HSPA5	10	A3A1	LIHC
P63104	YWHAZ	23	A3A1	LIHC
P67809	YBX1	8	A3A1	LIHC
Q13501	SQSTM1	6	A3A1	LIHC
Q92597	NDRG1	6	A3A1	LIHC
O00159	MYO1C	5	A3A2	LIHC
P05141	SLC25A5	7	A3A2	LIHC
P11021	HSPA5	6	A3A2	LIHC
P24539	ATP5F1	5	A3A2	LIHC
P27824	CANX	5	A3A2	LIHC
P35579	MYH9	13	A3A2	LIHC
P60709	ACTB	11	A3A2	LIHC
Q16795	NDUFA9	5	A3A2	LIHC
Q7KZF4	SND1	4	A3A2	LIHC
Q96CV9	OPTN	7	A3A2	LIHC
P06748	NPM1	57	A3A3	LIHC
P07900	HSP90AA1	12	A3A3	LIHC
P08238	HSP90AB1	21	A3A3	LIHC
P11021	HSPA5	17	A3A3	LIHC
P27635	RPL10	65	A3A3	LIHC
P27824	CANX	13	A3A3	LIHC
P62136	PPP1CA	15	A3A3	LIHC
P63104	YWHAZ	38	A3A3	LIHC
P67809	YBX1	25	A3A3	LIHC
Q9P0L0	VAPA	18	A3A3	LIHC
O75787	ATP6AP2	7	A3A4	LIHC
P01023	A2M	10	A3A4	LIHC
P02751	FN1	29	A3A4	LIHC
P02768	ALB	9	A3A4	LIHC
P04626	ERBB2	17	A3A4	LIHC
P08238	HSP90AB1	11	A3A4	LIHC
P11021	HSPA5	11	A3A4	LIHC
P62993	GRB2	38	A3A4	LIHC
P67809	YBX1	8	A3A4	LIHC
Q9H0R8	GABARAPL1	52	A3A4	LIHC
P04626	ERBB2	14	A3A5	LIHC
P04792	HSPB1	17	A3A5	LIHC
P08238	HSP90AB1	17	A3A5	LIHC
P08670	VIM	11	A3A5	LIHC
P21333	FLNA	12	A3A5	LIHC
P27635	RPL10	34	A3A5	LIHC
P35579	MYH9	19	A3A5	LIHC
P60900	PSMA6	9	A3A5	LIHC
Q13418	ILK	10	A3A5	LIHC
Q16543	CDC37	10	A3A5	LIHC
O95166	GABARAP	48	A3A6	LIHC
P00519	ABL1	18	A3A6	LIHC
P04792	HSPB1	17	A3A6	LIHC
P21333	FLNA	31	A3A6	LIHC
P35579	MYH9	41	A3A6	LIHC
P60709	ACTB	23	A3A6	LIHC
P63104	YWHAZ	40	A3A6	LIHC
Q13418	ILK	15	A3A6	LIHC
Q71U36	TUBA1A	15	A3A6	LIHC
Q8N3V7	SYNPO	33	A3A6	LIHC
P04792	HSPB1	13	A3A8	LIHC
P06748	NPM1	15	A3A8	LIHC
P07900	HSP90AA1	5	A3A8	LIHC
P08238	HSP90AB1	8	A3A8	LIHC
P08473	MME	7	A3A8	LIHC
P11021	HSPA5	4	A3A8	LIHC
P29692	EEF1D	4	A3A8	LIHC
P35222	CTNNB1	3	A3A8	LIHC
P43243	MATR3	3	A3A8	LIHC
Q9NYU2	UGGT1	3	A3A8	LIHC
P04792	HSPB1	6	A3CH	LIHC
P05067	APP	7	A3CH	LIHC
P08238	HSP90AB1	7	A3CH	LIHC
P0CG48	UBC	5	A3CH	LIHC
P12004	PCNA	6	A3CH	LIHC
P35579	MYH9	15	A3CH	LIHC
P60709	ACTB	15	A3CH	LIHC
P63104	YWHAZ	22	A3CH	LIHC
Q00987	MDM2	4	A3CH	LIHC
Q13501	SQSTM1	5	A3CH	LIHC
P04792	HSPB1	19	A3I0	LIHC
P06748	NPM1	53	A3I0	LIHC
P08238	HSP90AB1	25	A3I0	LIHC
P13569	CFTR	24	A3I0	LIHC
P21333	FLNA	21	A3I0	LIHC
P27635	RPL10	64	A3I0	LIHC
P35579	MYH9	28	A3I0	LIHC
P63104	YWHAZ	52	A3I0	LIHC
Q13418	ILK	27	A3I0	LIHC
Q16643	DBN1	23	A3I0	LIHC
P02751	FN1	45	A3I1	LIHC
P04792	HSPB1	13	A3I1	LIHC
P07900	HSP90AA1	10	A3I1	LIHC
P08238	HSP90AB1	17	A3I1	LIHC
P11021	HSPA5	17	A3I1	LIHC
P21333	FLNA	18	A3I1	LIHC
P35579	MYH9	22	A3I1	LIHC
P60709	ACTB	23	A3I1	LIHC
P63104	YWHAZ	37	A3I1	LIHC
P67809	YBX1	12	A3I1	LIHC
P02751	FN1	20	A3R2	LIHC
P04792	HSPB1	7	A3R2	LIHC
P05067	APP	6	A3R2	LIHC
P06748	NPM1	4	A3R2	LIHC
P07900	HSP90AA1	9	A3R2	LIHC
P08238	HSP90AB1	4	A3R2	LIHC
P27824	CANX	4	A3R2	LIHC
P35579	MYH9	11	A3R2	LIHC
P51149	RAB7A	5	A3R2	LIHC
P51617	IRAK1	7	A3R2	LIHC
P04792	HSPB1	12	A3RK	LIHC
P06748	NPM1	14	A3RK	LIHC
P07900	HSP90AA1	14	A3RK	LIHC
P08238	HSP90AB1	20	A3RK	LIHC
P0CG48	UBC	11	A3RK	LIHC
P11021	HSPA5	17	A3RK	LIHC
P27635	RPL10	16	A3RK	LIHC
P27824	CANX	9	A3RK	LIHC
P60709	ACTB	29	A3RK	LIHC
P63104	YWHAZ	34	A3RK	LIHC

## Sheet: KIRC
Target Uniprotkb	Target Genesymbol	Connections	Patient	Tissue		Target Uniprotkb	Target Genesymbol	N patients KIRC
P25786	PSMA1	6	3358	KIRC		P02751	FN1	61
P60709	ACTB	7	3358	KIRC		P27635	RPL10	56
Q8IY31	IFT20	4	3358	KIRC		P19320	VCAM1	55
Q92731	ESR2	11	3358	KIRC		P06748	NPM1	47
Q96NL6	SCLT1	10	3358	KIRC		P60709	ACTB	43
Q99598	TSNAX	5	3358	KIRC		P08238	HSP90AB1	38
Q9H492	MAP1LC3A	17	3358	KIRC		P35579	MYH9	35
Q9NZI8	IGF2BP1	5	3358	KIRC		P00533	EGFR	30
Q9UG01	IFT172	5	3358	KIRC		P21333	FLNA	30
Q9UJV9	DDX41	4	3358	KIRC		Q5S007	LRRK2	29
P00533	EGFR	29	3387	KIRC		P63104	YWHAZ	28
P02751	FN1	45	3387	KIRC		Q8N3V7	SYNPO	25
P06748	NPM1	23	3387	KIRC		Q8IVT5	KSR1	21
P08238	HSP90AB1	21	3387	KIRC		Q92597	NDRG1	20
P19320	VCAM1	69	3387	KIRC		P05412	JUN	17
P27635	RPL10	27	3387	KIRC		P67809	YBX1	11
P35579	MYH9	26	3387	KIRC		Q71U36	TUBA1A	10
P60709	ACTB	27	3387	KIRC		P01106	MYC	9
P63104	YWHAZ	32	3387	KIRC		O95166	GABARAP	8
Q5S007	LRRK2	42	3387	KIRC		P11021	HSPA5	8
P02751	FN1	31	4619	KIRC		P21860	ERBB3	8
P04626	ERBB2	14	4619	KIRC		P46940	IQGAP1	8
P08238	HSP90AB1	9	4619	KIRC		P62280	RPS11	8
P13569	CFTR	13	4619	KIRC		P08670	VIM	6
P35579	MYH9	23	4619	KIRC		P30101	PDIA3	6
P46940	IQGAP1	11	4619	KIRC		Q00987	MDM2	6
P47755	CAPZA2	20	4619	KIRC		Q03518	TAP1	5
Q14203	DCTN1	7	4619	KIRC		P04792	HSPB1	4
Q9H0R8	GABARAPL1	41	4619	KIRC		Q96CV9	OPTN	4
Q9UHB6	LIMA1	13	4619	KIRC		P01023	A2M	3
P00533	EGFR	31	4620	KIRC		P0CG48	UBC	3
P01106	MYC	27	4620	KIRC		P04626	ERBB2	2
P02751	FN1	44	4620	KIRC		P08473	MME	2
P05412	JUN	95	4620	KIRC		P27824	CANX	2
P06748	NPM1	37	4620	KIRC		P47755	CAPZA2	2
P08238	HSP90AB1	16	4620	KIRC		P51858	HDGF	2
P27635	RPL10	44	4620	KIRC		P62993	GRB2	2
Q16666	IFI16	9	4620	KIRC		Q00610	CLTC	2
Q8IVT5	KSR1	15	4620	KIRC		Q13501	SQSTM1	2
Q92597	NDRG1	10	4620	KIRC		Q16666	IFI16	2
P00533	EGFR	26	4622	KIRC		Q9UH99	SUN2	2
P02751	FN1	24	4622	KIRC		P01100	FOS	1
P08238	HSP90AB1	13	4622	KIRC		P05067	APP	1
P08581	MET	7	4622	KIRC		P07900	HSP90AA1	1
P08670	VIM	6	4622	KIRC		P08581	MET	1
P15692	VEGFA	6	4622	KIRC		P13569	CFTR	1
P21333	FLNA	7	4622	KIRC		P15692	VEGFA	1
P21860	ERBB3	9	4622	KIRC		P19838	NFKB1	1
P35579	MYH9	11	4622	KIRC		P25786	PSMA1	1
Q8IVT5	KSR1	9	4622	KIRC		P26641	EEF1G	1
O95166	GABARAP	79	4700	KIRC		P36873	PPP1CC	1
P02751	FN1	68	4700	KIRC		P40763	STAT3	1
P05412	JUN	137	4700	KIRC		P42224	STAT1	1
P06748	NPM1	49	4700	KIRC		P43243	MATR3	1
P19320	VCAM1	114	4700	KIRC		P60033	CD81	1
P21333	FLNA	20	4700	KIRC		P61769	B2M	1
P27635	RPL10	57	4700	KIRC		P62140	PPP1CB	1
P35579	MYH9	29	4700	KIRC		Q00839	HNRNPU	1
P60709	ACTB	40	4700	KIRC		Q04917	YWHAH	1
P63104	YWHAZ	42	4700	KIRC		Q07157	TJP1	1
P02751	FN1	71	4712	KIRC		Q13043	STK4	1
P05412	JUN	150	4712	KIRC		Q13418	ILK	1
P06748	NPM1	49	4712	KIRC		Q14203	DCTN1	1
P21333	FLNA	15	4712	KIRC		Q16643	DBN1	1
P27635	RPL10	60	4712	KIRC		Q8IXL6	FAM20C	1
P60709	ACTB	40	4712	KIRC		Q8IY31	IFT20	1
P63104	YWHAZ	37	4712	KIRC		Q92614	MYO18A	1
P67809	YBX1	19	4712	KIRC		Q92731	ESR2	1
Q13418	ILK	16	4712	KIRC		Q96B97	SH3KBP1	1
Q8N3V7	SYNPO	16	4712	KIRC		Q96NL6	SCLT1	1
P02751	FN1	22	4863	KIRC		Q99598	TSNAX	1
P19320	VCAM1	31	4863	KIRC		Q9H0R8	GABARAPL1	1
P21333	FLNA	6	4863	KIRC		Q9H492	MAP1LC3A	1
P30101	PDIA3	5	4863	KIRC		Q9H6Z9	EGLN3	1
P35579	MYH9	9	4863	KIRC		Q9NZI8	IGF2BP1	1
Q03518	TAP1	7	4863	KIRC		Q9UG01	IFT172	1
Q5S007	LRRK2	16	4863	KIRC		Q9UHB6	LIMA1	1
Q8IVT5	KSR1	6	4863	KIRC		Q9UJV9	DDX41	1
Q8N3V7	SYNPO	5	4863	KIRC		Q9UQ80	PA2G4	1
Q96CV9	OPTN	5	4863	KIRC
P00533	EGFR	12	4864	KIRC
P02751	FN1	18	4864	KIRC
P06748	NPM1	9	4864	KIRC
P08238	HSP90AB1	8	4864	KIRC
P19320	VCAM1	24	4864	KIRC
P61769	B2M	4	4864	KIRC
Q03518	TAP1	5	4864	KIRC
Q04917	YWHAH	4	4864	KIRC
Q5S007	LRRK2	21	4864	KIRC
Q92597	NDRG1	4	4864	KIRC
P02751	FN1	52	4865	KIRC
P06748	NPM1	40	4865	KIRC
P08670	VIM	9	4865	KIRC
P19320	VCAM1	82	4865	KIRC
P21333	FLNA	10	4865	KIRC
P27635	RPL10	45	4865	KIRC
P35579	MYH9	15	4865	KIRC
P60709	ACTB	29	4865	KIRC
P63104	YWHAZ	29	4865	KIRC
Q8N3V7	SYNPO	9	4865	KIRC
P00533	EGFR	27	5402	KIRC
P01100	FOS	7	5402	KIRC
P02751	FN1	43	5402	KIRC
P05412	JUN	98	5402	KIRC
P06748	NPM1	40	5402	KIRC
P08238	HSP90AB1	12	5402	KIRC
P27635	RPL10	47	5402	KIRC
P62280	RPS11	8	5402	KIRC
Q16666	IFI16	8	5402	KIRC
Q92597	NDRG1	11	5402	KIRC
P02751	FN1	49	5451	KIRC
P06748	NPM1	38	5451	KIRC
P19320	VCAM1	86	5451	KIRC
P21333	FLNA	14	5451	KIRC
P27635	RPL10	45	5451	KIRC
P35579	MYH9	17	5451	KIRC
P60709	ACTB	32	5451	KIRC
Q5S007	LRRK2	42	5451	KIRC
Q71U36	TUBA1A	10	5451	KIRC
Q8IVT5	KSR1	11	5451	KIRC
P06748	NPM1	43	5452	KIRC
P08238	HSP90AB1	17	5452	KIRC
P19320	VCAM1	89	5452	KIRC
P27635	RPL10	47	5452	KIRC
P35579	MYH9	19	5452	KIRC
P51858	HDGF	8	5452	KIRC
P60709	ACTB	35	5452	KIRC
P67809	YBX1	12	5452	KIRC
Q8N3V7	SYNPO	11	5452	KIRC
Q92597	NDRG1	8	5452	KIRC
P02751	FN1	57	5453	KIRC
P05412	JUN	109	5453	KIRC
P06748	NPM1	41	5453	KIRC
P08238	HSP90AB1	15	5453	KIRC
P19320	VCAM1	92	5453	KIRC
P27635	RPL10	47	5453	KIRC
P60709	ACTB	33	5453	KIRC
Q5S007	LRRK2	44	5453	KIRC
Q71U36	TUBA1A	11	5453	KIRC
Q8IVT5	KSR1	18	5453	KIRC
O95166	GABARAP	83	5454	KIRC
P00533	EGFR	30	5454	KIRC
P01106	MYC	30	5454	KIRC
P02751	FN1	68	5454	KIRC
P06748	NPM1	53	5454	KIRC
P19320	VCAM1	124	5454	KIRC
P27635	RPL10	60	5454	KIRC
P63104	YWHAZ	32	5454	KIRC
P67809	YBX1	22	5454	KIRC
Q8IVT5	KSR1	20	5454	KIRC
P02751	FN1	31	5455	KIRC
P08238	HSP90AB1	9	5455	KIRC
P19320	VCAM1	40	5455	KIRC
P21333	FLNA	8	5455	KIRC
P35579	MYH9	15	5455	KIRC
P46940	IQGAP1	9	5455	KIRC
P63104	YWHAZ	19	5455	KIRC
Q03518	TAP1	7	5455	KIRC
Q5S007	LRRK2	19	5455	KIRC
Q8IVT5	KSR1	11	5455	KIRC
P00533	EGFR	40	5456	KIRC
P02751	FN1	46	5456	KIRC
P06748	NPM1	29	5456	KIRC
P08238	HSP90AB1	16	5456	KIRC
P11021	HSPA5	13	5456	KIRC
P19320	VCAM1	80	5456	KIRC
P27635	RPL10	33	5456	KIRC
Q13043	STK4	12	5456	KIRC
Q5S007	LRRK2	39	5456	KIRC
Q8N3V7	SYNPO	11	5456	KIRC
P02751	FN1	55	5457	KIRC
P06748	NPM1	52	5457	KIRC
P08473	MME	8	5457	KIRC
P08670	VIM	6	5457	KIRC
P11021	HSPA5	7	5457	KIRC
P19320	VCAM1	88	5457	KIRC
P21860	ERBB3	7	5457	KIRC
P27635	RPL10	60	5457	KIRC
P62280	RPS11	9	5457	KIRC
Q92597	NDRG1	10	5457	KIRC
P00533	EGFR	22	5458	KIRC
P01023	A2M	7	5458	KIRC
P02751	FN1	37	5458	KIRC
P06748	NPM1	32	5458	KIRC
P19320	VCAM1	65	5458	KIRC
P21333	FLNA	7	5458	KIRC
P27635	RPL10	35	5458	KIRC
P35579	MYH9	11	5458	KIRC
Q8N3V7	SYNPO	8	5458	KIRC
Q92597	NDRG1	5	5458	KIRC
P02751	FN1	53	5461	KIRC
P06748	NPM1	45	5461	KIRC
P08238	HSP90AB1	16	5461	KIRC
P08670	VIM	8	5461	KIRC
P19320	VCAM1	90	5461	KIRC
P27635	RPL10	53	5461	KIRC
P62280	RPS11	8	5461	KIRC
Q5S007	LRRK2	42	5461	KIRC
Q8N3V7	SYNPO	7	5461	KIRC
Q92597	NDRG1	9	5461	KIRC
P00533	EGFR	24	5462	KIRC
P01106	MYC	22	5462	KIRC
P02751	FN1	23	5462	KIRC
P05412	JUN	56	5462	KIRC
P06748	NPM1	8	5462	KIRC
P08238	HSP90AB1	8	5462	KIRC
P0CG48	UBC	11	5462	KIRC
P19320	VCAM1	41	5462	KIRC
P21860	ERBB3	8	5462	KIRC
P63104	YWHAZ	22	5462	KIRC
P00533	EGFR	29	5463	KIRC
P02751	FN1	34	5463	KIRC
P06748	NPM1	29	5463	KIRC
P08238	HSP90AB1	11	5463	KIRC
P19320	VCAM1	70	5463	KIRC
P27635	RPL10	30	5463	KIRC
Q5S007	LRRK2	33	5463	KIRC
Q8IVT5	KSR1	13	5463	KIRC
Q92597	NDRG1	6	5463	KIRC
Q96CV9	OPTN	6	5463	KIRC
O95166	GABARAP	82	5465	KIRC
P01106	MYC	30	5465	KIRC
P02751	FN1	59	5465	KIRC
P06748	NPM1	55	5465	KIRC
P08238	HSP90AB1	21	5465	KIRC
P19320	VCAM1	110	5465	KIRC
P27635	RPL10	62	5465	KIRC
P60709	ACTB	42	5465	KIRC
P63104	YWHAZ	38	5465	KIRC
Q5S007	LRRK2	52	5465	KIRC
P00533	EGFR	31	5466	KIRC
P01106	MYC	37	5466	KIRC
P02751	FN1	60	5466	KIRC
P06748	NPM1	48	5466	KIRC
P08238	HSP90AB1	15	5466	KIRC
P27635	RPL10	55	5466	KIRC
P35579	MYH9	14	5466	KIRC
P60709	ACTB	37	5466	KIRC
P63104	YWHAZ	35	5466	KIRC
P67809	YBX1	22	5466	KIRC
P01106	MYC	23	5467	KIRC
P02751	FN1	52	5467	KIRC
P06748	NPM1	48	5467	KIRC
P08238	HSP90AB1	15	5467	KIRC
P21333	FLNA	8	5467	KIRC
P27635	RPL10	54	5467	KIRC
P62280	RPS11	7	5467	KIRC
Q71U36	TUBA1A	7	5467	KIRC
Q8N3V7	SYNPO	8	5467	KIRC
Q92597	NDRG1	11	5467	KIRC
P01106	MYC	34	5468	KIRC
P02751	FN1	43	5468	KIRC
P04792	HSPB1	10	5468	KIRC
P05412	JUN	85	5468	KIRC
P0CG48	UBC	10	5468	KIRC
P11021	HSPA5	12	5468	KIRC
P21333	FLNA	16	5468	KIRC
P60709	ACTB	18	5468	KIRC
P63104	YWHAZ	34	5468	KIRC
Q8N3V7	SYNPO	13	5468	KIRC
O95166	GABARAP	90	5469	KIRC
P02751	FN1	64	5469	KIRC
P06748	NPM1	52	5469	KIRC
P08238	HSP90AB1	15	5469	KIRC
P19320	VCAM1	118	5469	KIRC
P27635	RPL10	58	5469	KIRC
P60709	ACTB	37	5469	KIRC
P63104	YWHAZ	38	5469	KIRC
P67809	YBX1	26	5469	KIRC
Q9UQ80	PA2G4	14	5469	KIRC
P02751	FN1	52	5470	KIRC
P06748	NPM1	38	5470	KIRC
P19320	VCAM1	95	5470	KIRC
P27635	RPL10	43	5470	KIRC
P35579	MYH9	17	5470	KIRC
P60709	ACTB	30	5470	KIRC
P62993	GRB2	66	5470	KIRC
P63104	YWHAZ	35	5470	KIRC
P67809	YBX1	20	5470	KIRC
Q92597	NDRG1	11	5470	KIRC
P00533	EGFR	30	5549	KIRC
P02751	FN1	55	5549	KIRC
P06748	NPM1	48	5549	KIRC
P08238	HSP90AB1	12	5549	KIRC
P19320	VCAM1	90	5549	KIRC
P21860	ERBB3	8	5549	KIRC
P27635	RPL10	55	5549	KIRC
P30101	PDIA3	8	5549	KIRC
P62280	RPS11	10	5549	KIRC
Q92597	NDRG1	8	5549	KIRC
P00533	EGFR	36	5580	KIRC
P02751	FN1	60	5580	KIRC
P06748	NPM1	40	5580	KIRC
P08238	HSP90AB1	18	5580	KIRC
P19320	VCAM1	97	5580	KIRC
P27635	RPL10	47	5580	KIRC
P35579	MYH9	16	5580	KIRC
P63104	YWHAZ	35	5580	KIRC
Q00987	MDM2	17	5580	KIRC
Q5S007	LRRK2	42	5580	KIRC
P00533	EGFR	27	5581	KIRC
P02751	FN1	52	5581	KIRC
P06748	NPM1	36	5581	KIRC
P19320	VCAM1	89	5581	KIRC
P21333	FLNA	17	5581	KIRC
P27635	RPL10	38	5581	KIRC
P35579	MYH9	25	5581	KIRC
P60709	ACTB	29	5581	KIRC
P63104	YWHAZ	32	5581	KIRC
Q5S007	LRRK2	42	5581	KIRC
P00533	EGFR	16	5584	KIRC
P02751	FN1	24	5584	KIRC
P19320	VCAM1	34	5584	KIRC
P21333	FLNA	7	5584	KIRC
P21860	ERBB3	5	5584	KIRC
P27635	RPL10	6	5584	KIRC
P35579	MYH9	14	5584	KIRC
P60709	ACTB	10	5584	KIRC
Q5S007	LRRK2	20	5584	KIRC
Q8N3V7	SYNPO	8	5584	KIRC
P02751	FN1	30	5585	KIRC
P06748	NPM1	13	5585	KIRC
P19320	VCAM1	48	5585	KIRC
P21333	FLNA	12	5585	KIRC
P27635	RPL10	14	5585	KIRC
P30101	PDIA3	8	5585	KIRC
Q13501	SQSTM1	7	5585	KIRC
Q71U36	TUBA1A	7	5585	KIRC
Q8IVT5	KSR1	13	5585	KIRC
Q8N3V7	SYNPO	10	5585	KIRC
P02751	FN1	33	5587	KIRC
P06748	NPM1	11	5587	KIRC
P08238	HSP90AB1	15	5587	KIRC
P19320	VCAM1	51	5587	KIRC
P21333	FLNA	10	5587	KIRC
P27635	RPL10	13	5587	KIRC
P35579	MYH9	14	5587	KIRC
P60709	ACTB	15	5587	KIRC
Q5S007	LRRK2	24	5587	KIRC
Q8IVT5	KSR1	15	5587	KIRC
P02751	FN1	50	5589	KIRC
P05412	JUN	103	5589	KIRC
P06748	NPM1	39	5589	KIRC
P08238	HSP90AB1	21	5589	KIRC
P19320	VCAM1	88	5589	KIRC
P21333	FLNA	14	5589	KIRC
P27635	RPL10	47	5589	KIRC
P35579	MYH9	20	5589	KIRC
P60709	ACTB	32	5589	KIRC
Q8IVT5	KSR1	14	5589	KIRC
P04626	ERBB2	8	5591	KIRC
P05067	APP	6	5591	KIRC
P19320	VCAM1	34	5591	KIRC
P35579	MYH9	20	5591	KIRC
P40763	STAT3	5	5591	KIRC
P42224	STAT1	5	5591	KIRC
Q00610	CLTC	4	5591	KIRC
Q07157	TJP1	4	5591	KIRC
Q16643	DBN1	19	5591	KIRC
Q71U36	TUBA1A	7	5591	KIRC
P00533	EGFR	29	5636	KIRC
P02751	FN1	34	5636	KIRC
P05412	JUN	68	5636	KIRC
P08238	HSP90AB1	22	5636	KIRC
P21333	FLNA	15	5636	KIRC
P27635	RPL10	25	5636	KIRC
P35579	MYH9	19	5636	KIRC
P60709	ACTB	24	5636	KIRC
Q8N3V7	SYNPO	13	5636	KIRC
Q9H6Z9	EGLN3	8	5636	KIRC
P00533	EGFR	28	5641	KIRC
P02751	FN1	58	5641	KIRC
P06748	NPM1	47	5641	KIRC
P08238	HSP90AB1	20	5641	KIRC
P19320	VCAM1	96	5641	KIRC
P27635	RPL10	52	5641	KIRC
P35579	MYH9	14	5641	KIRC
P60709	ACTB	35	5641	KIRC
P63104	YWHAZ	31	5641	KIRC
Q5S007	LRRK2	47	5641	KIRC
P01023	A2M	9	5672	KIRC
P02751	FN1	51	5672	KIRC
P11021	HSPA5	8	5672	KIRC
P19320	VCAM1	83	5672	KIRC
P21333	FLNA	11	5672	KIRC
P27635	RPL10	39	5672	KIRC
P35579	MYH9	18	5672	KIRC
P60709	ACTB	28	5672	KIRC
Q8N3V7	SYNPO	11	5672	KIRC
Q92597	NDRG1	8	5672	KIRC
P02751	FN1	71	5677	KIRC
P06748	NPM1	52	5677	KIRC
P08238	HSP90AB1	22	5677	KIRC
P19320	VCAM1	114	5677	KIRC
P21333	FLNA	20	5677	KIRC
P27635	RPL10	59	5677	KIRC
P35579	MYH9	28	5677	KIRC
P60709	ACTB	39	5677	KIRC
P63104	YWHAZ	40	5677	KIRC
Q8N3V7	SYNPO	19	5677	KIRC
O95166	GABARAP	90	5678	KIRC
P04792	HSPB1	15	5678	KIRC
P06748	NPM1	51	5678	KIRC
P08238	HSP90AB1	15	5678	KIRC
P11021	HSPA5	12	5678	KIRC
P19320	VCAM1	116	5678	KIRC
P27635	RPL10	60	5678	KIRC
P51858	HDGF	11	5678	KIRC
P60709	ACTB	38	5678	KIRC
P63104	YWHAZ	38	5678	KIRC
P02751	FN1	54	5679	KIRC
P11021	HSPA5	11	5679	KIRC
P21333	FLNA	10	5679	KIRC
P21860	ERBB3	13	5679	KIRC
P27635	RPL10	48	5679	KIRC
P27824	CANX	10	5679	KIRC
P60709	ACTB	29	5679	KIRC
Q71U36	TUBA1A	9	5679	KIRC
Q8IVT5	KSR1	16	5679	KIRC
Q8N3V7	SYNPO	10	5679	KIRC
P19320	VCAM1	54	5680	KIRC
P27635	RPL10	27	5680	KIRC
P30101	PDIA3	7	5680	KIRC
P62280	RPS11	5	5680	KIRC
P67809	YBX1	10	5680	KIRC
Q03518	TAP1	5	5680	KIRC
Q5S007	LRRK2	29	5680	KIRC
Q8IVT5	KSR1	10	5680	KIRC
Q92597	NDRG1	6	5680	KIRC
Q9UH99	SUN2	5	5680	KIRC
P00533	EGFR	23	5681	KIRC
P02751	FN1	26	5681	KIRC
P07900	HSP90AA1	6	5681	KIRC
P35579	MYH9	13	5681	KIRC
P60033	CD81	5	5681	KIRC
Q00610	CLTC	5	5681	KIRC
Q71U36	TUBA1A	7	5681	KIRC
Q92614	MYO18A	8	5681	KIRC
Q96B97	SH3KBP1	5	5681	KIRC
Q96CV9	OPTN	7	5681	KIRC
O95166	GABARAP	55	5689	KIRC
P00533	EGFR	19	5689	KIRC
P01023	A2M	8	5689	KIRC
P02751	FN1	38	5689	KIRC
P05412	JUN	84	5689	KIRC
P27635	RPL10	38	5689	KIRC
P60709	ACTB	25	5689	KIRC
P67809	YBX1	14	5689	KIRC
Q8N3V7	SYNPO	10	5689	KIRC
Q92597	NDRG1	8	5689	KIRC
P02751	FN1	49	5690	KIRC
P19320	VCAM1	77	5690	KIRC
P21333	FLNA	24	5690	KIRC
P27635	RPL10	34	5690	KIRC
P35579	MYH9	32	5690	KIRC
P60709	ACTB	31	5690	KIRC
P63104	YWHAZ	32	5690	KIRC
Q71U36	TUBA1A	11	5690	KIRC
Q8IVT5	KSR1	14	5690	KIRC
Q8N3V7	SYNPO	22	5690	KIRC
P02751	FN1	29	5691	KIRC
P06748	NPM1	21	5691	KIRC
P19320	VCAM1	52	5691	KIRC
P21333	FLNA	8	5691	KIRC
P27635	RPL10	23	5691	KIRC
P35579	MYH9	13	5691	KIRC
P60709	ACTB	19	5691	KIRC
Q5S007	LRRK2	32	5691	KIRC
Q8IVT5	KSR1	11	5691	KIRC
Q8N3V7	SYNPO	9	5691	KIRC
P00533	EGFR	23	5694	KIRC
P02751	FN1	51	5694	KIRC
P06748	NPM1	46	5694	KIRC
P08238	HSP90AB1	14	5694	KIRC
P19320	VCAM1	92	5694	KIRC
P27635	RPL10	55	5694	KIRC
P60709	ACTB	31	5694	KIRC
P67809	YBX1	17	5694	KIRC
Q8N3V7	SYNPO	8	5694	KIRC
Q92597	NDRG1	9	5694	KIRC
P02751	FN1	60	5696	KIRC
P06748	NPM1	43	5696	KIRC
P08238	HSP90AB1	20	5696	KIRC
P19320	VCAM1	107	5696	KIRC
P21333	FLNA	12	5696	KIRC
P27635	RPL10	50	5696	KIRC
P60709	ACTB	38	5696	KIRC
Q71U36	TUBA1A	13	5696	KIRC
Q8IVT5	KSR1	18	5696	KIRC
Q8N3V7	SYNPO	12	5696	KIRC
O95166	GABARAP	48	5697	KIRC
P02751	FN1	49	5697	KIRC
P19320	VCAM1	80	5697	KIRC
P21333	FLNA	19	5697	KIRC
P27635	RPL10	28	5697	KIRC
P60709	ACTB	31	5697	KIRC
P63104	YWHAZ	33	5697	KIRC
Q00987	MDM2	10	5697	KIRC
Q5S007	LRRK2	38	5697	KIRC
Q71U36	TUBA1A	10	5697	KIRC
P02751	FN1	58	5699	KIRC
P06748	NPM1	36	5699	KIRC
P08238	HSP90AB1	18	5699	KIRC
P19320	VCAM1	91	5699	KIRC
P27635	RPL10	40	5699	KIRC
P35579	MYH9	18	5699	KIRC
P60709	ACTB	33	5699	KIRC
P63104	YWHAZ	34	5699	KIRC
P67809	YBX1	20	5699	KIRC
Q5S007	LRRK2	49	5699	KIRC
P00533	EGFR	25	5701	KIRC
P04792	HSPB1	7	5701	KIRC
P06748	NPM1	21	5701	KIRC
P08238	HSP90AB1	8	5701	KIRC
P0CG48	UBC	7	5701	KIRC
P19320	VCAM1	63	5701	KIRC
P21860	ERBB3	7	5701	KIRC
P27824	CANX	7	5701	KIRC
P67809	YBX1	10	5701	KIRC
Q8IVT5	KSR1	12	5701	KIRC
P00533	EGFR	25	5703	KIRC
P01106	MYC	19	5703	KIRC
P02751	FN1	39	5703	KIRC
P08238	HSP90AB1	14	5703	KIRC
P27635	RPL10	18	5703	KIRC
P35579	MYH9	12	5703	KIRC
Q8IVT5	KSR1	14	5703	KIRC
Q8N3V7	SYNPO	9	5703	KIRC
Q92597	NDRG1	7	5703	KIRC
Q9UH99	SUN2	9	5703	KIRC
P04792	HSPB1	7	5705	KIRC
P06748	NPM1	29	5705	KIRC
P11021	HSPA5	8	5705	KIRC
P19320	VCAM1	63	5705	KIRC
P26641	EEF1G	7	5705	KIRC
P27635	RPL10	33	5705	KIRC
P62280	RPS11	6	5705	KIRC
Q5S007	LRRK2	39	5705	KIRC
Q8IVT5	KSR1	10	5705	KIRC
Q92597	NDRG1	9	5705	KIRC
P00533	EGFR	35	5706	KIRC
P02751	FN1	37	5706	KIRC
P05412	JUN	76	5706	KIRC
P08238	HSP90AB1	15	5706	KIRC
P11021	HSPA5	13	5706	KIRC
P19320	VCAM1	59	5706	KIRC
P27635	RPL10	18	5706	KIRC
P30101	PDIA3	10	5706	KIRC
P63104	YWHAZ	26	5706	KIRC
Q8IXL6	FAM20C	13	5706	KIRC
P00533	EGFR	24	5709	KIRC
P02751	FN1	41	5709	KIRC
P19320	VCAM1	53	5709	KIRC
P21333	FLNA	19	5709	KIRC
P27635	RPL10	14	5709	KIRC
P35579	MYH9	29	5709	KIRC
P46940	IQGAP1	16	5709	KIRC
P60709	ACTB	18	5709	KIRC
Q8IVT5	KSR1	11	5709	KIRC
Q8N3V7	SYNPO	17	5709	KIRC
P02751	FN1	50	5711	KIRC
P06748	NPM1	32	5711	KIRC
P08238	HSP90AB1	19	5711	KIRC
P19320	VCAM1	77	5711	KIRC
P21333	FLNA	13	5711	KIRC
P27635	RPL10	33	5711	KIRC
P35579	MYH9	17	5711	KIRC
P60709	ACTB	26	5711	KIRC
P63104	YWHAZ	28	5711	KIRC
Q5S007	LRRK2	38	5711	KIRC
P00533	EGFR	27	5712	KIRC
P06748	NPM1	19	5712	KIRC
P08238	HSP90AB1	10	5712	KIRC
P19320	VCAM1	63	5712	KIRC
P21860	ERBB3	7	5712	KIRC
Q03518	TAP1	6	5712	KIRC
Q13501	SQSTM1	8	5712	KIRC
Q5S007	LRRK2	33	5712	KIRC
Q92597	NDRG1	7	5712	KIRC
Q96CV9	OPTN	6	5712	KIRC
P00533	EGFR	37	5982	KIRC
P01106	MYC	30	5982	KIRC
P02751	FN1	43	5982	KIRC
P05412	JUN	77	5982	KIRC
P19320	VCAM1	66	5982	KIRC
P19838	NFKB1	25	5982	KIRC
P35579	MYH9	22	5982	KIRC
P46940	IQGAP1	18	5982	KIRC
P60709	ACTB	24	5982	KIRC
P63104	YWHAZ	35	5982	KIRC
P02751	FN1	51	5984	KIRC
P06748	NPM1	39	5984	KIRC
P08238	HSP90AB1	15	5984	KIRC
P19320	VCAM1	94	5984	KIRC
P27635	RPL10	47	5984	KIRC
P36873	PPP1CC	15	5984	KIRC
P60709	ACTB	30	5984	KIRC
Q00987	MDM2	16	5984	KIRC
Q5S007	LRRK2	47	5984	KIRC
Q92597	NDRG1	12	5984	KIRC
P00533	EGFR	29	5985	KIRC
P02751	FN1	42	5985	KIRC
P06748	NPM1	20	5985	KIRC
P19320	VCAM1	70	5985	KIRC
P27635	RPL10	24	5985	KIRC
P46940	IQGAP1	11	5985	KIRC
P60709	ACTB	23	5985	KIRC
P63104	YWHAZ	28	5985	KIRC
Q5S007	LRRK2	34	5985	KIRC
Q8IVT5	KSR1	17	5985	KIRC
P00533	EGFR	32	5986	KIRC
P02751	FN1	41	5986	KIRC
P05412	JUN	87	5986	KIRC
P06748	NPM1	31	5986	KIRC
P08238	HSP90AB1	16	5986	KIRC
P19320	VCAM1	79	5986	KIRC
P27635	RPL10	36	5986	KIRC
P60709	ACTB	28	5986	KIRC
Q00987	MDM2	15	5986	KIRC
Q5S007	LRRK2	42	5986	KIRC
P05412	JUN	72	5987	KIRC
P08670	VIM	6	5987	KIRC
P19320	VCAM1	58	5987	KIRC
P27635	RPL10	24	5987	KIRC
P30101	PDIA3	7	5987	KIRC
P60709	ACTB	15	5987	KIRC
P62280	RPS11	5	5987	KIRC
Q00987	MDM2	6	5987	KIRC
Q5S007	LRRK2	26	5987	KIRC
Q92597	NDRG1	5	5987	KIRC
P00533	EGFR	36	5988	KIRC
P02751	FN1	52	5988	KIRC
P05412	JUN	97	5988	KIRC
P06748	NPM1	28	5988	KIRC
P19320	VCAM1	82	5988	KIRC
P21333	FLNA	17	5988	KIRC
P27635	RPL10	34	5988	KIRC
P35579	MYH9	24	5988	KIRC
P46940	IQGAP1	15	5988	KIRC
P60709	ACTB	31	5988	KIRC
P00533	EGFR	19	5989	KIRC
P02751	FN1	33	5989	KIRC
P19320	VCAM1	49	5989	KIRC
P43243	MATR3	9	5989	KIRC
P46940	IQGAP1	11	5989	KIRC
P47755	CAPZA2	14	5989	KIRC
P62140	PPP1CB	14	5989	KIRC
P63104	YWHAZ	15	5989	KIRC
Q00987	MDM2	9	5989	KIRC
Q5S007	LRRK2	16	5989	KIRC
P02751	FN1	46	6030	KIRC
P06748	NPM1	29	6030	KIRC
P19320	VCAM1	68	6030	KIRC
P21333	FLNA	13	6030	KIRC
P27635	RPL10	33	6030	KIRC
P35579	MYH9	20	6030	KIRC
P46940	IQGAP1	10	6030	KIRC
P60709	ACTB	24	6030	KIRC
Q5S007	LRRK2	31	6030	KIRC
Q8N3V7	SYNPO	11	6030	KIRC
P02751	FN1	64	6033	KIRC
P06748	NPM1	49	6033	KIRC
P08238	HSP90AB1	23	6033	KIRC
P19320	VCAM1	107	6033	KIRC
P21333	FLNA	18	6033	KIRC
P27635	RPL10	54	6033	KIRC
P35579	MYH9	25	6033	KIRC
P60709	ACTB	35	6033	KIRC
P63104	YWHAZ	38	6033	KIRC
Q8N3V7	SYNPO	19	6033	KIRC
P02751	FN1	63	6087	KIRC
P06748	NPM1	25	6087	KIRC
P08238	HSP90AB1	21	6087	KIRC
P19320	VCAM1	99	6087	KIRC
P21333	FLNA	20	6087	KIRC
P27635	RPL10	32	6087	KIRC
P35579	MYH9	30	6087	KIRC
P60709	ACTB	30	6087	KIRC
P62993	GRB2	65	6087	KIRC
P63104	YWHAZ	33	6087	KIRC
P02751	FN1	32	6088	KIRC
P05412	JUN	55	6088	KIRC
P08473	MME	7	6088	KIRC
P08670	VIM	7	6088	KIRC
P19320	VCAM1	52	6088	KIRC
P21333	FLNA	12	6088	KIRC
P27635	RPL10	21	6088	KIRC
P60709	ACTB	20	6088	KIRC
Q5S007	LRRK2	27	6088	KIRC
Q8N3V7	SYNPO	10	6088	KIRC
O95166	GABARAP	93	6090	KIRC
P02751	FN1	83	6090	KIRC
P05412	JUN	169	6090	KIRC
P06748	NPM1	62	6090	KIRC
P08238	HSP90AB1	28	6090	KIRC
P27635	RPL10	67	6090	KIRC
P35579	MYH9	28	6090	KIRC
P60709	ACTB	52	6090	KIRC
P63104	YWHAZ	40	6090	KIRC
Q00839	HNRNPU	59	6090	KIRC

## Sheet: KIRP
Target Uniprotkb	Target Genesymbol	Connections	Patient	Tissue		Target Uniprotkb	Target Genesymbol	N patients KIRP
O95166	GABARAP	79	4115	KIRP		P60709	ACTB	25
P04792	HSPB1	13	4115	KIRP		Q5S007	LRRK2	20
P08670	VIM	10	4115	KIRP		P19320	VCAM1	18
P19320	VCAM1	103	4115	KIRP		P02751	FN1	17
P27635	RPL10	54	4115	KIRP		P04792	HSPB1	16
P60709	ACTB	39	4115	KIRP		P27635	RPL10	16
P62280	RPS11	9	4115	KIRP		P08238	HSP90AB1	14
P63104	YWHAZ	36	4115	KIRP		P63104	YWHAZ	13
Q5S007	LRRK2	44	4115	KIRP		P06748	NPM1	10
Q9NY93	DDX56	13	4115	KIRP		P21333	FLNA	10
P01106	MYC	27	5875	KIRP		P08670	VIM	9
P02751	FN1	37	5875	KIRP		Q71U36	TUBA1A	9
P04792	HSPB1	7	5875	KIRP		O95166	GABARAP	8
P05141	SLC25A5	8	5875	KIRP		P35579	MYH9	8
P07900	HSP90AA1	9	5875	KIRP		P62993	GRB2	8
P08238	HSP90AB1	16	5875	KIRP		P01106	MYC	6
P27105	STOM	10	5875	KIRP		P07900	HSP90AA1	6
P51148	RAB5C	8	5875	KIRP		P46940	IQGAP1	6
Q00610	CLTC	6	5875	KIRP		P21860	ERBB3	5
Q9GZQ8	MAP1LC3B	37	5875	KIRP		P47755	CAPZA2	5
P02751	FN1	47	5877	KIRP		Q9GZQ8	MAP1LC3B	5
P06748	NPM1	31	5877	KIRP		O00159	MYO1C	4
P08238	HSP90AB1	19	5877	KIRP		P05412	JUN	4
P19320	VCAM1	82	5877	KIRP		P11021	HSPA5	4
P21333	FLNA	15	5877	KIRP		P62280	RPS11	4
P27635	RPL10	36	5877	KIRP		Q00987	MDM2	4
P46940	IQGAP1	16	5877	KIRP		Q13509	TUBB4	4
P60709	ACTB	30	5877	KIRP		P00533	EGFR	3
P63104	YWHAZ	32	5877	KIRP		P05067	APP	3
Q5S007	LRRK2	38	5877	KIRP		P56945	BCAR1	3
P01106	MYC	32	5878	KIRP		P61981	YWHAG	3
P02751	FN1	41	5878	KIRP		Q00839	HNRNPU	3
P05412	JUN	78	5878	KIRP		Q13501	SQSTM1	3
P06748	NPM1	20	5878	KIRP		P08473	MME	2
P08238	HSP90AB1	19	5878	KIRP		P32121	ARRB2	2
P19320	VCAM1	67	5878	KIRP		P45973	CBX5	2
P21333	FLNA	17	5878	KIRP		P62140	PPP1CB	2
P27635	RPL10	24	5878	KIRP		Q00610	CLTC	2
P60709	ACTB	30	5878	KIRP		O95758	ROD1	1
Q71U36	TUBA1A	14	5878	KIRP		P00519	ABL1	1
P00533	EGFR	40	5879	KIRP		P04406	GAPDH	1
P02751	FN1	77	5879	KIRP		P04626	ERBB2	1
P05412	JUN	137	5879	KIRP		P05141	SLC25A5	1
P21333	FLNA	27	5879	KIRP		P08581	MET	1
P27635	RPL10	37	5879	KIRP		P0CG48	UBC	1
P35579	MYH9	34	5879	KIRP		P10909	CLU	1
P46940	IQGAP1	27	5879	KIRP		P13569	CFTR	1
P60709	ACTB	33	5879	KIRP		P16104	H2AFX	1
P63104	YWHAZ	46	5879	KIRP		P27105	STOM	1
Q9GZQ8	MAP1LC3B	44	5879	KIRP		P31946	YWHAB	1
O95166	GABARAP	63	5882	KIRP		P33993	MCM7	1
P02751	FN1	45	5882	KIRP		P38606	ATP6V1A	1
P04792	HSPB1	10	5882	KIRP		P42858	HTT	1
P06748	NPM1	32	5882	KIRP		P51148	RAB5C	1
P27635	RPL10	39	5882	KIRP		P51149	RAB7A	1
P35579	MYH9	15	5882	KIRP		P60520	GABARAPL2	1
P60709	ACTB	25	5882	KIRP		P62136	PPP1CA	1
P63104	YWHAZ	28	5882	KIRP		P67809	YBX1	1
Q16666	IFI16	9	5882	KIRP		Q04917	YWHAH	1
Q5S007	LRRK2	38	5882	KIRP		Q05193	DNM1	1
P00533	EGFR	29	5884	KIRP		Q08AM6	VAC14	1
P02751	FN1	23	5884	KIRP		Q14203	DCTN1	1
P04792	HSPB1	10	5884	KIRP		Q16643	DBN1	1
P05067	APP	10	5884	KIRP		Q16666	IFI16	1
P19320	VCAM1	38	5884	KIRP		Q8N3V7	SYNPO	1
P42858	HTT	11	5884	KIRP		Q92597	NDRG1	1
P46940	IQGAP1	16	5884	KIRP		Q93062	RBPMS	1
P47755	CAPZA2	16	5884	KIRP		Q9H0R8	GABARAPL1	1
P60709	ACTB	9	5884	KIRP		Q9NY93	DDX56	1
P62140	PPP1CB	15	5884	KIRP		Q9P0L0	VAPA	1
P02751	FN1	43	5887	KIRP		Q9UHB6	LIMA1	1
P04792	HSPB1	12	5887	KIRP		Q9UQ80	PA2G4	1
P06748	NPM1	25	5887	KIRP
P08238	HSP90AB1	15	5887	KIRP
P21333	FLNA	16	5887	KIRP
P27635	RPL10	28	5887	KIRP
P35579	MYH9	24	5887	KIRP
P60520	GABARAPL2	56	5887	KIRP
Q71U36	TUBA1A	12	5887	KIRP
Q8N3V7	SYNPO	17	5887	KIRP
O00159	MYO1C	9	5888	KIRP
O95166	GABARAP	76	5888	KIRP
P04792	HSPB1	11	5888	KIRP
P08670	VIM	10	5888	KIRP
P19320	VCAM1	108	5888	KIRP
P21333	FLNA	14	5888	KIRP
P27635	RPL10	53	5888	KIRP
P60709	ACTB	32	5888	KIRP
P62280	RPS11	8	5888	KIRP
Q13509	TUBB4	11	5888	KIRP
O95166	GABARAP	93	5890	KIRP
P06748	NPM1	43	5890	KIRP
P19320	VCAM1	133	5890	KIRP
P27635	RPL10	48	5890	KIRP
P60709	ACTB	40	5890	KIRP
P62136	PPP1CA	15	5890	KIRP
P62993	GRB2	64	5890	KIRP
P63104	YWHAZ	39	5890	KIRP
Q00839	HNRNPU	44	5890	KIRP
Q5S007	LRRK2	57	5890	KIRP
O95166	GABARAP	76	5891	KIRP
P06748	NPM1	27	5891	KIRP
P21333	FLNA	19	5891	KIRP
P27635	RPL10	31	5891	KIRP
P60709	ACTB	29	5891	KIRP
P63104	YWHAZ	45	5891	KIRP
Q00839	HNRNPU	31	5891	KIRP
Q5S007	LRRK2	53	5891	KIRP
Q71U36	TUBA1A	21	5891	KIRP
Q9GZQ8	MAP1LC3B	52	5891	KIRP
P01106	MYC	39	5894	KIRP
P02751	FN1	90	5894	KIRP
P16104	H2AFX	29	5894	KIRP
P21333	FLNA	30	5894	KIRP
P35579	MYH9	36	5894	KIRP
P46940	IQGAP1	29	5894	KIRP
P60709	ACTB	40	5894	KIRP
P62140	PPP1CB	28	5894	KIRP
P63104	YWHAZ	45	5894	KIRP
Q16643	DBN1	31	5894	KIRP
P00519	ABL1	13	6131	KIRP
P04792	HSPB1	10	6131	KIRP
P08238	HSP90AB1	17	6131	KIRP
P08670	VIM	9	6131	KIRP
P27635	RPL10	41	6131	KIRP
P35579	MYH9	15	6131	KIRP
P47755	CAPZA2	12	6131	KIRP
P62993	GRB2	59	6131	KIRP
Q00987	MDM2	13	6131	KIRP
Q5S007	LRRK2	42	6131	KIRP
P02751	FN1	20	6132	KIRP
P08670	VIM	5	6132	KIRP
P0CG48	UBC	5	6132	KIRP
P10909	CLU	5	6132	KIRP
P11021	HSPA5	5	6132	KIRP
P19320	VCAM1	29	6132	KIRP
P60709	ACTB	12	6132	KIRP
P62993	GRB2	18	6132	KIRP
Q00987	MDM2	5	6132	KIRP
Q5S007	LRRK2	12	6132	KIRP
O00159	MYO1C	8	6133	KIRP
P11021	HSPA5	12	6133	KIRP
P31946	YWHAB	11	6133	KIRP
P33993	MCM7	8	6133	KIRP
P47755	CAPZA2	18	6133	KIRP
P51149	RAB7A	7	6133	KIRP
P56945	BCAR1	24	6133	KIRP
P60709	ACTB	12	6133	KIRP
Q14203	DCTN1	7	6133	KIRP
Q5S007	LRRK2	19	6133	KIRP
P02751	FN1	30	6134	KIRP
P07900	HSP90AA1	9	6134	KIRP
P19320	VCAM1	46	6134	KIRP
P45973	CBX5	6	6134	KIRP
P60709	ACTB	17	6134	KIRP
P61981	YWHAG	9	6134	KIRP
P63104	YWHAZ	32	6134	KIRP
P67809	YBX1	6	6134	KIRP
Q5S007	LRRK2	24	6134	KIRP
Q71U36	TUBA1A	8	6134	KIRP
O00159	MYO1C	7	6846	KIRP
O95758	ROD1	11	6846	KIRP
P04792	HSPB1	6	6846	KIRP
P19320	VCAM1	37	6846	KIRP
P45973	CBX5	6	6846	KIRP
P60709	ACTB	15	6846	KIRP
P62993	GRB2	27	6846	KIRP
Q08AM6	VAC14	4	6846	KIRP
Q5S007	LRRK2	20	6846	KIRP
Q71U36	TUBA1A	6	6846	KIRP
P02751	FN1	50	7044	KIRP
P05067	APP	10	7044	KIRP
P07900	HSP90AA1	10	7044	KIRP
P08238	HSP90AB1	10	7044	KIRP
P21333	FLNA	19	7044	KIRP
P46940	IQGAP1	15	7044	KIRP
P56945	BCAR1	30	7044	KIRP
P60709	ACTB	18	7044	KIRP
P63104	YWHAZ	33	7044	KIRP
Q5S007	LRRK2	38	7044	KIRP
O95166	GABARAP	74	7045	KIRP
P04792	HSPB1	13	7045	KIRP
P08238	HSP90AB1	19	7045	KIRP
P08670	VIM	12	7045	KIRP
P11021	HSPA5	11	7045	KIRP
P60709	ACTB	35	7045	KIRP
P63104	YWHAZ	35	7045	KIRP
Q13509	TUBB4	14	7045	KIRP
Q92597	NDRG1	9	7045	KIRP
Q9GZQ8	MAP1LC3B	42	7045	KIRP
O95166	GABARAP	30	7046	KIRP
P02751	FN1	31	7046	KIRP
P04792	HSPB1	9	7046	KIRP
P08670	VIM	10	7046	KIRP
P19320	VCAM1	47	7046	KIRP
P56945	BCAR1	24	7046	KIRP
P60709	ACTB	14	7046	KIRP
P62993	GRB2	32	7046	KIRP
Q00987	MDM2	8	7046	KIRP
Q5S007	LRRK2	22	7046	KIRP
P04626	ERBB2	13	7051	KIRP
P04792	HSPB1	8	7051	KIRP
P05067	APP	9	7051	KIRP
P07900	HSP90AA1	10	7051	KIRP
P08238	HSP90AB1	13	7051	KIRP
P19320	VCAM1	56	7051	KIRP
P21860	ERBB3	8	7051	KIRP
P60709	ACTB	18	7051	KIRP
Q13501	SQSTM1	7	7051	KIRP
Q5S007	LRRK2	29	7051	KIRP
P02751	FN1	35	7055	KIRP
P08238	HSP90AB1	12	7055	KIRP
P13569	CFTR	14	7055	KIRP
P27635	RPL10	20	7055	KIRP
P38606	ATP6V1A	10	7055	KIRP
P47755	CAPZA2	18	7055	KIRP
Q04917	YWHAH	8	7055	KIRP
Q9H0R8	GABARAPL1	67	7055	KIRP
Q9P0L0	VAPA	10	7055	KIRP
Q9UHB6	LIMA1	10	7055	KIRP
P02751	FN1	46	7059	KIRP
P05412	JUN	76	7059	KIRP
P19320	VCAM1	73	7059	KIRP
P21333	FLNA	17	7059	KIRP
P27635	RPL10	22	7059	KIRP
P32121	ARRB2	37	7059	KIRP
P35579	MYH9	22	7059	KIRP
P60709	ACTB	27	7059	KIRP
P63104	YWHAZ	30	7059	KIRP
Q5S007	LRRK2	30	7059	KIRP
P02751	FN1	35	7061	KIRP
P04792	HSPB1	8	7061	KIRP
P06748	NPM1	16	7061	KIRP
P08238	HSP90AB1	13	7061	KIRP
P08473	MME	6	7061	KIRP
P19320	VCAM1	67	7061	KIRP
P21333	FLNA	10	7061	KIRP
P35579	MYH9	14	7061	KIRP
Q5S007	LRRK2	28	7061	KIRP
Q71U36	TUBA1A	14	7061	KIRP
P00533	EGFR	36	7966	KIRP
P01106	MYC	45	7966	KIRP
P02751	FN1	71	7966	KIRP
P08238	HSP90AB1	23	7966	KIRP
P27635	RPL10	59	7966	KIRP
P35579	MYH9	19	7966	KIRP
P60709	ACTB	34	7966	KIRP
P63104	YWHAZ	46	7966	KIRP
Q00839	HNRNPU	51	7966	KIRP
Q00987	MDM2	16	7966	KIRP
P04792	HSPB1	7	A4ZT	KIRP
P07900	HSP90AA1	8	A4ZT	KIRP
P08238	HSP90AB1	7	A4ZT	KIRP
P19320	VCAM1	46	A4ZT	KIRP
P21860	ERBB3	7	A4ZT	KIRP
P47755	CAPZA2	10	A4ZT	KIRP
P60709	ACTB	19	A4ZT	KIRP
P61981	YWHAG	5	A4ZT	KIRP
Q5S007	LRRK2	25	A4ZT	KIRP
Q71U36	TUBA1A	6	A4ZT	KIRP
P02751	FN1	57	A57E	KIRP
P06748	NPM1	41	A57E	KIRP
P08238	HSP90AB1	10	A57E	KIRP
P19320	VCAM1	103	A57E	KIRP
P27635	RPL10	48	A57E	KIRP
P60709	ACTB	28	A57E	KIRP
P61981	YWHAG	6	A57E	KIRP
P62280	RPS11	7	A57E	KIRP
Q13501	SQSTM1	6	A57E	KIRP
Q9UQ80	PA2G4	13	A57E	KIRP
O00159	MYO1C	7	A59R	KIRP
P07900	HSP90AA1	6	A59R	KIRP
P19320	VCAM1	41	A59R	KIRP
P21860	ERBB3	6	A59R	KIRP
P60709	ACTB	20	A59R	KIRP
P62993	GRB2	34	A59R	KIRP
Q00610	CLTC	7	A59R	KIRP
Q13509	TUBB4	6	A59R	KIRP
Q5S007	LRRK2	21	A59R	KIRP
Q71U36	TUBA1A	9	A59R	KIRP
P01106	MYC	35	A5E8	KIRP
P05412	JUN	111	A5E8	KIRP
P06748	NPM1	40	A5E8	KIRP
P08670	VIM	11	A5E8	KIRP
P11021	HSPA5	13	A5E8	KIRP
P46940	IQGAP1	11	A5E8	KIRP
P63104	YWHAZ	35	A5E8	KIRP
Q13509	TUBB4	12	A5E8	KIRP
Q5S007	LRRK2	43	A5E8	KIRP
Q9GZQ8	MAP1LC3B	39	A5E8	KIRP
O95166	GABARAP	38	A5ED	KIRP
P04406	GAPDH	5	A5ED	KIRP
P04792	HSPB1	6	A5ED	KIRP
P08581	MET	5	A5ED	KIRP
P08670	VIM	7	A5ED	KIRP
P27635	RPL10	33	A5ED	KIRP
P32121	ARRB2	27	A5ED	KIRP
P60709	ACTB	25	A5ED	KIRP
P62280	RPS11	5	A5ED	KIRP
P62993	GRB2	53	A5ED	KIRP
P04792	HSPB1	5	A8RY	KIRP
P08670	VIM	6	A8RY	KIRP
P19320	VCAM1	37	A8RY	KIRP
P21860	ERBB3	5	A8RY	KIRP
P60709	ACTB	17	A8RY	KIRP
P62993	GRB2	29	A8RY	KIRP
Q05193	DNM1	4	A8RY	KIRP
Q5S007	LRRK2	14	A8RY	KIRP
Q71U36	TUBA1A	4	A8RY	KIRP
Q93062	RBPMS	5	A8RY	KIRP
P01106	MYC	17	A9DE	KIRP
P04792	HSPB1	10	A9DE	KIRP
P06748	NPM1	14	A9DE	KIRP
P08238	HSP90AB1	12	A9DE	KIRP
P08473	MME	8	A9DE	KIRP
P19320	VCAM1	61	A9DE	KIRP
P21860	ERBB3	8	A9DE	KIRP
P27635	RPL10	20	A9DE	KIRP
Q13501	SQSTM1	7	A9DE	KIRP
Q5S007	LRRK2	31	A9DE	KIRP

## Sheet: BRCA
Target Uniprotkb	Target Genesymbol	Connections	Patient	Tissue		Target Uniprotkb	Target Genesymbol	N patients BRCA
P02751	FN1	35	A0AY	BRCA		P02751	FN1	80
P04792	HSPB1	12	A0AY	BRCA		P60709	ACTB	58
P07900	HSP90AA1	10	A0AY	BRCA		P63104	YWHAZ	55
P08238	HSP90AB1	15	A0AY	BRCA		P08238	HSP90AB1	49
P11021	HSPA5	9	A0AY	BRCA		P03372	ESR1	44
P31749	AKT1	9	A0AY	BRCA		P11021	HSPA5	39
P51858	HDGF	6	A0AY	BRCA		Q00839	HNRNPU	38
P60709	ACTB	20	A0AY	BRCA		P04626	ERBB2	36
P63104	YWHAZ	27	A0AY	BRCA		P04792	HSPB1	33
P63167	DYNLL1	5	A0AY	BRCA		P35579	MYH9	28
P02751	FN1	35	A0AZ	BRCA		P51858	HDGF	27
P04792	HSPB1	11	A0AZ	BRCA		P06748	NPM1	26
P08238	HSP90AB1	13	A0AZ	BRCA		P21860	ERBB3	19
P0CG48	UBC	6	A0AZ	BRCA		P07900	HSP90AA1	16
P11021	HSPA5	10	A0AZ	BRCA		P21333	FLNA	16
P27824	CANX	6	A0AZ	BRCA		P46940	IQGAP1	16
P30101	PDIA3	7	A0AZ	BRCA		P27635	RPL10	15
P35579	MYH9	19	A0AZ	BRCA		P62993	GRB2	14
P60709	ACTB	21	A0AZ	BRCA		Q71U36	TUBA1A	13
P63104	YWHAZ	26	A0AZ	BRCA		P67809	YBX1	12
P02751	FN1	24	A0B5	BRCA		O95758	ROD1	11
P04626	ERBB2	9	A0B5	BRCA		P30101	PDIA3	11
P06748	NPM1	7	A0B5	BRCA		P62140	PPP1CB	8
P09651	HNRNPA1	6	A0B5	BRCA		Q13501	SQSTM1	7
P12830	CDH1	5	A0B5	BRCA		P0CG48	UBC	6
P35222	CTNNB1	7	A0B5	BRCA		P27824	CANX	6
P46940	IQGAP1	8	A0B5	BRCA		P31749	AKT1	6
P51858	HDGF	6	A0B5	BRCA		P43243	MATR3	6
P60709	ACTB	12	A0B5	BRCA		Q13509	TUBB4	6
Q00839	HNRNPU	12	A0B5	BRCA		P62136	PPP1CA	5
P02751	FN1	43	A0B7	BRCA		Q16643	DBN1	5
P04626	ERBB2	21	A0B7	BRCA		Q92597	NDRG1	5
P11021	HSPA5	13	A0B7	BRCA		P05067	APP	4
P30101	PDIA3	9	A0B7	BRCA		P45973	CBX5	4
P35579	MYH9	23	A0B7	BRCA		P60953	CDC42	4
P46940	IQGAP1	17	A0B7	BRCA		P61160	ACTR2	4
P60709	ACTB	15	A0B7	BRCA		Q15154	PCM1	4
P67809	YBX1	9	A0B7	BRCA		O14879	IFIT3	3
Q13509	TUBB4	9	A0B7	BRCA		O75787	ATP6AP2	3
Q16643	DBN1	16	A0B7	BRCA		P01100	FOS	3
P02751	FN1	43	A0B8	BRCA		P08670	VIM	3
P03372	ESR1	66	A0B8	BRCA		P09651	HNRNPA1	3
P04626	ERBB2	13	A0B8	BRCA		P38919	EIF4A3	3
P04792	HSPB1	10	A0B8	BRCA		P49755	TMED10	3
P06748	NPM1	35	A0B8	BRCA		P55317	FOXA1	3
P08238	HSP90AB1	16	A0B8	BRCA		P61769	B2M	3
P21860	ERBB3	7	A0B8	BRCA		Q03518	TAP1	3
P27635	RPL10	41	A0B8	BRCA		Q92542	NCSTN	3
P51858	HDGF	15	A0B8	BRCA		O15264	MAPK13	2
Q00839	HNRNPU	35	A0B8	BRCA		P00533	EGFR	2
P02751	FN1	29	A0BC	BRCA		P01023	A2M	2
P03372	ESR1	40	A0BC	BRCA		P0C0L4	C4A	2
P04792	HSPB1	11	A0BC	BRCA		P12830	CDH1	2
P21860	ERBB3	7	A0BC	BRCA		P19320	VCAM1	2
P51858	HDGF	6	A0BC	BRCA		P29692	EEF1D	2
P55317	FOXA1	4	A0BC	BRCA		P31946	YWHAB	2
P60709	ACTB	13	A0BC	BRCA		P35222	CTNNB1	2
Q00839	HNRNPU	11	A0BC	BRCA		P35555	FBN1	2
Q15154	PCM1	4	A0BC	BRCA		P42224	STAT1	2
Q9BVK6	TMED9	5	A0BC	BRCA		Q13547	HDAC1	2
P02751	FN1	24	A0BJ	BRCA		Q16666	IFI16	2
P03372	ESR1	25	A0BJ	BRCA		Q92614	MYO18A	2
P04792	HSPB1	10	A0BJ	BRCA		O00159	MYO1C	1
P11021	HSPA5	5	A0BJ	BRCA		O95166	GABARAP	1
P30101	PDIA3	4	A0BJ	BRCA		O95793	STAU1	1
P60709	ACTB	11	A0BJ	BRCA		P01106	MYC	1
P61769	B2M	4	A0BJ	BRCA		P04062	GBA	1
Q00839	HNRNPU	3	A0BJ	BRCA		P04233	CD74	1
Q13501	SQSTM1	4	A0BJ	BRCA		P04637	TP53	1
Q9NQ11	ATP13A2	4	A0BJ	BRCA		P05783	KRT18	1
O75787	ATP6AP2	4	A0BM	BRCA		P10276	RARA	1
P01100	FOS	4	A0BM	BRCA		P11387	TOP1	1
P02751	FN1	23	A0BM	BRCA		P12004	PCNA	1
P0CG48	UBC	4	A0BM	BRCA		P14618	PKM2	1
P21860	ERBB3	4	A0BM	BRCA		P15336	ATF2	1
P30101	PDIA3	5	A0BM	BRCA		P15884	TCF4	1
P61160	ACTR2	3	A0BM	BRCA		P19838	NFKB1	1
Q00839	HNRNPU	6	A0BM	BRCA		P21980	TGM2	1
Q96BA8	CREB3L1	3	A0BM	BRCA		P26641	EEF1G	1
Q9NQC3	RTN4	3	A0BM	BRCA		P28300	LOX	1
P02751	FN1	42	A0BQ	BRCA		P30153	PPP2R1A	1
P03372	ESR1	59	A0BQ	BRCA		P36873	PPP1CC	1
P04626	ERBB2	14	A0BQ	BRCA		P38606	ATP6V1A	1
P21333	FLNA	8	A0BQ	BRCA		P51617	IRAK1	1
P27635	RPL10	48	A0BQ	BRCA		P60033	CD81	1
P30101	PDIA3	7	A0BQ	BRCA		P62280	RPS11	1
P35579	MYH9	13	A0BQ	BRCA		P63000	RAC1	1
P51858	HDGF	11	A0BQ	BRCA		P63167	DYNLL1	1
P60709	ACTB	23	A0BQ	BRCA		P68400	CSNK2A1	1
Q00839	HNRNPU	41	A0BQ	BRCA		P78362	SRPK2	1
P02751	FN1	37	A0BS	BRCA		Q00610	CLTC	1
P03372	ESR1	37	A0BS	BRCA		Q13185	CBX3	1
P04626	ERBB2	15	A0BS	BRCA		Q13418	ILK	1
P11021	HSPA5	12	A0BS	BRCA		Q15038	DAZAP2	1
P46940	IQGAP1	14	A0BS	BRCA		Q15113	PCOLCE	1
P49755	TMED10	6	A0BS	BRCA		Q16659	MAPK6	1
P60953	CDC42	9	A0BS	BRCA		Q96BA8	CREB3L1	1
P63104	YWHAZ	22	A0BS	BRCA		Q9BVK6	TMED9	1
Q92542	NCSTN	6	A0BS	BRCA		Q9H6Z9	EGLN3	1
Q9P0L0	VAPA	6	A0BS	BRCA		Q9NQ11	ATP13A2	1
O14879	IFIT3	6	A0BT	BRCA		Q9NQC3	RTN4	1
P02751	FN1	30	A0BT	BRCA		Q9P0L0	VAPA	1
P04626	ERBB2	11	A0BT	BRCA		Q9UHB6	LIMA1	1
P04792	HSPB1	10	A0BT	BRCA		Q9UMX0	UBQLN1	1
P08238	HSP90AB1	9	A0BT	BRCA		Q9Y5S9	RBM8A	1
P42224	STAT1	5	A0BT	BRCA
P60709	ACTB	14	A0BT	BRCA
P63104	YWHAZ	24	A0BT	BRCA
Q00839	HNRNPU	14	A0BT	BRCA
Q03518	TAP1	6	A0BT	BRCA
O95166	GABARAP	25	A0BV	BRCA
P02751	FN1	28	A0BV	BRCA
P03372	ESR1	34	A0BV	BRCA
P04792	HSPB1	11	A0BV	BRCA
P08238	HSP90AB1	14	A0BV	BRCA
P11021	HSPA5	9	A0BV	BRCA
P21860	ERBB3	8	A0BV	BRCA
P60709	ACTB	17	A0BV	BRCA
P63104	YWHAZ	29	A0BV	BRCA
Q71U36	TUBA1A	10	A0BV	BRCA
P02751	FN1	27	A0BW	BRCA
P08238	HSP90AB1	9	A0BW	BRCA
P11021	HSPA5	10	A0BW	BRCA
P19320	VCAM1	39	A0BW	BRCA
P19838	NFKB1	15	A0BW	BRCA
P21333	FLNA	11	A0BW	BRCA
P46940	IQGAP1	12	A0BW	BRCA
P62140	PPP1CB	11	A0BW	BRCA
P63104	YWHAZ	16	A0BW	BRCA
Q16666	IFI16	10	A0BW	BRCA
P02751	FN1	35	A0BZ	BRCA
P04792	HSPB1	10	A0BZ	BRCA
P06748	NPM1	11	A0BZ	BRCA
P07900	HSP90AA1	10	A0BZ	BRCA
P08238	HSP90AB1	13	A0BZ	BRCA
P35579	MYH9	15	A0BZ	BRCA
P60709	ACTB	20	A0BZ	BRCA
P62993	GRB2	41	A0BZ	BRCA
P63104	YWHAZ	31	A0BZ	BRCA
Q00839	HNRNPU	14	A0BZ	BRCA
P02751	FN1	40	A0C0	BRCA
P04792	HSPB1	7	A0C0	BRCA
P07900	HSP90AA1	9	A0C0	BRCA
P11021	HSPA5	8	A0C0	BRCA
P38919	EIF4A3	7	A0C0	BRCA
P60709	ACTB	13	A0C0	BRCA
P62136	PPP1CA	7	A0C0	BRCA
P62993	GRB2	33	A0C0	BRCA
P63104	YWHAZ	25	A0C0	BRCA
Q9UMX0	UBQLN1	5	A0C0	BRCA
P02751	FN1	19	A0C3	BRCA
P04792	HSPB1	7	A0C3	BRCA
P05783	KRT18	4	A0C3	BRCA
P07900	HSP90AA1	7	A0C3	BRCA
P08670	VIM	4	A0C3	BRCA
P14618	PKM2	4	A0C3	BRCA
P30101	PDIA3	4	A0C3	BRCA
P60709	ACTB	8	A0C3	BRCA
P63104	YWHAZ	19	A0C3	BRCA
Q03518	TAP1	5	A0C3	BRCA
P02751	FN1	29	A0D9	BRCA
P03372	ESR1	44	A0D9	BRCA
P04626	ERBB2	17	A0D9	BRCA
P04792	HSPB1	10	A0D9	BRCA
P06748	NPM1	10	A0D9	BRCA
P08238	HSP90AB1	13	A0D9	BRCA
P21860	ERBB3	10	A0D9	BRCA
P35579	MYH9	12	A0D9	BRCA
P60709	ACTB	17	A0D9	BRCA
P63104	YWHAZ	25	A0D9	BRCA
P02751	FN1	44	A0DB	BRCA
P03372	ESR1	69	A0DB	BRCA
P04626	ERBB2	18	A0DB	BRCA
P06748	NPM1	34	A0DB	BRCA
P08238	HSP90AB1	15	A0DB	BRCA
P21860	ERBB3	10	A0DB	BRCA
P27635	RPL10	41	A0DB	BRCA
P51858	HDGF	11	A0DB	BRCA
P60709	ACTB	31	A0DB	BRCA
Q00839	HNRNPU	37	A0DB	BRCA
O95758	ROD1	13	A0DC	BRCA
O95793	STAU1	9	A0DC	BRCA
P03372	ESR1	63	A0DC	BRCA
P04792	HSPB1	15	A0DC	BRCA
P06748	NPM1	29	A0DC	BRCA
P08238	HSP90AB1	14	A0DC	BRCA
P62993	GRB2	57	A0DC	BRCA
P63104	YWHAZ	25	A0DC	BRCA
Q00839	HNRNPU	28	A0DC	BRCA
Q13547	HDAC1	8	A0DC	BRCA
P02751	FN1	31	A0DD	BRCA
P03372	ESR1	52	A0DD	BRCA
P04626	ERBB2	14	A0DD	BRCA
P08238	HSP90AB1	11	A0DD	BRCA
P09651	HNRNPA1	9	A0DD	BRCA
P43243	MATR3	9	A0DD	BRCA
P45973	CBX5	8	A0DD	BRCA
P63104	YWHAZ	27	A0DD	BRCA
Q00839	HNRNPU	20	A0DD	BRCA
Q13185	CBX3	7	A0DD	BRCA
P02751	FN1	29	A0DG	BRCA
P04792	HSPB1	8	A0DG	BRCA
P21333	FLNA	14	A0DG	BRCA
P30101	PDIA3	6	A0DG	BRCA
P31749	AKT1	10	A0DG	BRCA
P35579	MYH9	19	A0DG	BRCA
P60709	ACTB	14	A0DG	BRCA
P62136	PPP1CA	8	A0DG	BRCA
P62993	GRB2	40	A0DG	BRCA
Q13501	SQSTM1	6	A0DG	BRCA
O15264	MAPK13	11	A0DH	BRCA
O95758	ROD1	7	A0DH	BRCA
P02751	FN1	21	A0DH	BRCA
P03372	ESR1	22	A0DH	BRCA
P04626	ERBB2	20	A0DH	BRCA
P21860	ERBB3	7	A0DH	BRCA
P46940	IQGAP1	9	A0DH	BRCA
P49755	TMED10	5	A0DH	BRCA
Q00610	CLTC	6	A0DH	BRCA
Q15154	PCM1	6	A0DH	BRCA
P02751	FN1	45	A0DK	BRCA
P06748	NPM1	38	A0DK	BRCA
P08238	HSP90AB1	12	A0DK	BRCA
P21333	FLNA	11	A0DK	BRCA
P27635	RPL10	44	A0DK	BRCA
P35579	MYH9	16	A0DK	BRCA
P51858	HDGF	13	A0DK	BRCA
P60709	ACTB	27	A0DK	BRCA
P63104	YWHAZ	26	A0DK	BRCA
Q00839	HNRNPU	38	A0DK	BRCA
P00533	EGFR	35	A0DL	BRCA
P02751	FN1	30	A0DL	BRCA
P07900	HSP90AA1	10	A0DL	BRCA
P11021	HSPA5	9	A0DL	BRCA
P60709	ACTB	18	A0DL	BRCA
P62140	PPP1CB	14	A0DL	BRCA
P63104	YWHAZ	24	A0DL	BRCA
P67809	YBX1	10	A0DL	BRCA
Q16659	MAPK6	23	A0DL	BRCA
Q16666	IFI16	11	A0DL	BRCA
P02751	FN1	22	A0DP	BRCA
P03372	ESR1	52	A0DP	BRCA
P06748	NPM1	24	A0DP	BRCA
P09651	HNRNPA1	5	A0DP	BRCA
P27635	RPL10	29	A0DP	BRCA
P29692	EEF1D	6	A0DP	BRCA
P51858	HDGF	8	A0DP	BRCA
P60709	ACTB	16	A0DP	BRCA
Q00839	HNRNPU	27	A0DP	BRCA
Q13501	SQSTM1	5	A0DP	BRCA
P02751	FN1	26	A0DQ	BRCA
P04792	HSPB1	10	A0DQ	BRCA
P07900	HSP90AA1	8	A0DQ	BRCA
P08238	HSP90AB1	12	A0DQ	BRCA
P21333	FLNA	17	A0DQ	BRCA
P35579	MYH9	22	A0DQ	BRCA
P60709	ACTB	19	A0DQ	BRCA
P63104	YWHAZ	26	A0DQ	BRCA
Q13501	SQSTM1	6	A0DQ	BRCA
Q71U36	TUBA1A	9	A0DQ	BRCA
P02751	FN1	25	A0DT	BRCA
P03372	ESR1	39	A0DT	BRCA
P04792	HSPB1	7	A0DT	BRCA
P0C0L4	C4A	5	A0DT	BRCA
P21860	ERBB3	4	A0DT	BRCA
P51858	HDGF	3	A0DT	BRCA
P60709	ACTB	14	A0DT	BRCA
P63000	RAC1	3	A0DT	BRCA
P63104	YWHAZ	17	A0DT	BRCA
Q00839	HNRNPU	13	A0DT	BRCA
P01023	A2M	6	A0DV	BRCA
P02751	FN1	22	A0DV	BRCA
P15884	TCF4	5	A0DV	BRCA
P21980	TGM2	4	A0DV	BRCA
P30101	PDIA3	7	A0DV	BRCA
P35579	MYH9	18	A0DV	BRCA
P60709	ACTB	16	A0DV	BRCA
P61769	B2M	4	A0DV	BRCA
Q13501	SQSTM1	4	A0DV	BRCA
Q15113	PCOLCE	4	A0DV	BRCA
P02751	FN1	35	A0E0	BRCA
P04792	HSPB1	8	A0E0	BRCA
P07900	HSP90AA1	9	A0E0	BRCA
P08238	HSP90AB1	11	A0E0	BRCA
P11021	HSPA5	8	A0E0	BRCA
P60709	ACTB	19	A0E0	BRCA
P63104	YWHAZ	22	A0E0	BRCA
P67809	YBX1	16	A0E0	BRCA
Q92597	NDRG1	5	A0E0	BRCA
Q9Y5S9	RBM8A	5	A0E0	BRCA
P02751	FN1	21	A0E1	BRCA
P03372	ESR1	31	A0E1	BRCA
P04792	HSPB1	10	A0E1	BRCA
P0C0L4	C4A	5	A0E1	BRCA
P11021	HSPA5	10	A0E1	BRCA
P30101	PDIA3	5	A0E1	BRCA
P46940	IQGAP1	8	A0E1	BRCA
P55317	FOXA1	4	A0E1	BRCA
P60033	CD81	4	A0E1	BRCA
P63104	YWHAZ	17	A0E1	BRCA
P02751	FN1	26	A0H5	BRCA
P04233	CD74	4	A0H5	BRCA
P11021	HSPA5	7	A0H5	BRCA
P51858	HDGF	5	A0H5	BRCA
P60709	ACTB	14	A0H5	BRCA
P61160	ACTR2	5	A0H5	BRCA
P62993	GRB2	33	A0H5	BRCA
P63104	YWHAZ	20	A0H5	BRCA
Q00839	HNRNPU	6	A0H5	BRCA
Q03518	TAP1	6	A0H5	BRCA
P02751	FN1	33	A0H7	BRCA
P04792	HSPB1	10	A0H7	BRCA
P08238	HSP90AB1	15	A0H7	BRCA
P0CG48	UBC	7	A0H7	BRCA
P11021	HSPA5	8	A0H7	BRCA
P21333	FLNA	13	A0H7	BRCA
P60709	ACTB	15	A0H7	BRCA
P63104	YWHAZ	23	A0H7	BRCA
Q13501	SQSTM1	6	A0H7	BRCA
Q15038	DAZAP2	5	A0H7	BRCA
P02751	FN1	33	A0HA	BRCA
P04792	HSPB1	13	A0HA	BRCA
P08670	VIM	7	A0HA	BRCA
P0CG48	UBC	7	A0HA	BRCA
P30101	PDIA3	6	A0HA	BRCA
P30153	PPP2R1A	6	A0HA	BRCA
P51858	HDGF	5	A0HA	BRCA
P60709	ACTB	18	A0HA	BRCA
P63104	YWHAZ	24	A0HA	BRCA
Q71U36	TUBA1A	7	A0HA	BRCA
P01100	FOS	7	A0HK	BRCA
P02751	FN1	41	A0HK	BRCA
P03372	ESR1	61	A0HK	BRCA
P06748	NPM1	42	A0HK	BRCA
P07900	HSP90AA1	8	A0HK	BRCA
P27635	RPL10	49	A0HK	BRCA
P29692	EEF1D	7	A0HK	BRCA
P51858	HDGF	16	A0HK	BRCA
Q00839	HNRNPU	43	A0HK	BRCA
Q92597	NDRG1	9	A0HK	BRCA
P02751	FN1	25	A13G	BRCA
P03372	ESR1	39	A13G	BRCA
P04626	ERBB2	12	A13G	BRCA
P05067	APP	7	A13G	BRCA
P21860	ERBB3	6	A13G	BRCA
P31749	AKT1	8	A13G	BRCA
P35579	MYH9	14	A13G	BRCA
P51858	HDGF	8	A13G	BRCA
Q00839	HNRNPU	6	A13G	BRCA
Q92542	NCSTN	5	A13G	BRCA
P02751	FN1	42	A153	BRCA
P03372	ESR1	57	A153	BRCA
P04792	HSPB1	8	A153	BRCA
P06748	NPM1	35	A153	BRCA
P27635	RPL10	38	A153	BRCA
P51858	HDGF	8	A153	BRCA
P60709	ACTB	26	A153	BRCA
P63104	YWHAZ	26	A153	BRCA
Q00839	HNRNPU	34	A153	BRCA
Q92597	NDRG1	8	A153	BRCA
P08238	HSP90AB1	12	A158	BRCA
P11021	HSPA5	10	A158	BRCA
P26641	EEF1G	6	A158	BRCA
P27635	RPL10	50	A158	BRCA
P30101	PDIA3	6	A158	BRCA
P51858	HDGF	12	A158	BRCA
P62280	RPS11	7	A158	BRCA
P63104	YWHAZ	22	A158	BRCA
P67809	YBX1	23	A158	BRCA
Q92597	NDRG1	11	A158	BRCA
P02751	FN1	22	A15I	BRCA
P03372	ESR1	31	A15I	BRCA
P04626	ERBB2	10	A15I	BRCA
P08238	HSP90AB1	10	A15I	BRCA
P11021	HSPA5	7	A15I	BRCA
P12830	CDH1	6	A15I	BRCA
P21860	ERBB3	9	A15I	BRCA
P31749	AKT1	7	A15I	BRCA
P60709	ACTB	10	A15I	BRCA
Q9H6Z9	EGLN3	5	A15I	BRCA
O95758	ROD1	12	A15M	BRCA
P02751	FN1	36	A15M	BRCA
P03372	ESR1	35	A15M	BRCA
P04626	ERBB2	10	A15M	BRCA
P08238	HSP90AB1	12	A15M	BRCA
P11021	HSPA5	11	A15M	BRCA
P21860	ERBB3	9	A15M	BRCA
P43243	MATR3	8	A15M	BRCA
P51858	HDGF	12	A15M	BRCA
P63104	YWHAZ	20	A15M	BRCA
P02751	FN1	36	A18J	BRCA
P03372	ESR1	46	A18J	BRCA
P08238	HSP90AB1	14	A18J	BRCA
P11021	HSPA5	11	A18J	BRCA
P46940	IQGAP1	13	A18J	BRCA
P60709	ACTB	16	A18J	BRCA
P67809	YBX1	11	A18J	BRCA
Q00839	HNRNPU	10	A18J	BRCA
Q16643	DBN1	15	A18J	BRCA
Q71U36	TUBA1A	12	A18J	BRCA
P03372	ESR1	48	A18L	BRCA
P04626	ERBB2	14	A18L	BRCA
P06748	NPM1	12	A18L	BRCA
P07900	HSP90AA1	11	A18L	BRCA
P08238	HSP90AB1	15	A18L	BRCA
P11021	HSPA5	12	A18L	BRCA
P43243	MATR3	10	A18L	BRCA
P62993	GRB2	41	A18L	BRCA
P63104	YWHAZ	34	A18L	BRCA
Q00839	HNRNPU	11	A18L	BRCA
P02751	FN1	38	A18M	BRCA
P03372	ESR1	61	A18M	BRCA
P04792	HSPB1	13	A18M	BRCA
P06748	NPM1	15	A18M	BRCA
P08238	HSP90AB1	17	A18M	BRCA
P11021	HSPA5	11	A18M	BRCA
P27635	RPL10	21	A18M	BRCA
P27824	CANX	8	A18M	BRCA
P60709	ACTB	26	A18M	BRCA
Q00839	HNRNPU	16	A18M	BRCA
P02751	FN1	20	A18N	BRCA
P03372	ESR1	37	A18N	BRCA
P04626	ERBB2	9	A18N	BRCA
P04792	HSPB1	9	A18N	BRCA
P06748	NPM1	8	A18N	BRCA
P07900	HSP90AA1	7	A18N	BRCA
P08238	HSP90AB1	12	A18N	BRCA
P21860	ERBB3	7	A18N	BRCA
P62993	GRB2	33	A18N	BRCA
P63104	YWHAZ	20	A18N	BRCA
P02751	FN1	30	A18P	BRCA
P04626	ERBB2	18	A18P	BRCA
P11021	HSPA5	12	A18P	BRCA
P21860	ERBB3	9	A18P	BRCA
P35579	MYH9	13	A18P	BRCA
P43243	MATR3	13	A18P	BRCA
P46940	IQGAP1	10	A18P	BRCA
P60709	ACTB	11	A18P	BRCA
P62993	GRB2	44	A18P	BRCA
Q16643	DBN1	10	A18P	BRCA
P02751	FN1	38	A18Q	BRCA
P08238	HSP90AB1	15	A18Q	BRCA
P21333	FLNA	10	A18Q	BRCA
P35579	MYH9	14	A18Q	BRCA
P45973	CBX5	10	A18Q	BRCA
P51858	HDGF	10	A18Q	BRCA
P60709	ACTB	19	A18Q	BRCA
P63104	YWHAZ	25	A18Q	BRCA
P67809	YBX1	13	A18Q	BRCA
Q00839	HNRNPU	12	A18Q	BRCA
P02751	FN1	46	A18R	BRCA
P04626	ERBB2	18	A18R	BRCA
P04792	HSPB1	14	A18R	BRCA
P06748	NPM1	12	A18R	BRCA
P08238	HSP90AB1	16	A18R	BRCA
P36873	PPP1CC	12	A18R	BRCA
P51858	HDGF	11	A18R	BRCA
P62993	GRB2	51	A18R	BRCA
P63104	YWHAZ	32	A18R	BRCA
Q00839	HNRNPU	14	A18R	BRCA
P02751	FN1	22	A18S	BRCA
P03372	ESR1	29	A18S	BRCA
P04062	GBA	5	A18S	BRCA
P04626	ERBB2	10	A18S	BRCA
P08238	HSP90AB1	9	A18S	BRCA
P21860	ERBB3	6	A18S	BRCA
P27824	CANX	6	A18S	BRCA
P49755	TMED10	8	A18S	BRCA
P51858	HDGF	6	A18S	BRCA
Q92542	NCSTN	5	A18S	BRCA
P02751	FN1	59	A18U	BRCA
P03372	ESR1	64	A18U	BRCA
P04626	ERBB2	18	A18U	BRCA
P04792	HSPB1	14	A18U	BRCA
P06748	NPM1	25	A18U	BRCA
P11021	HSPA5	14	A18U	BRCA
P60709	ACTB	29	A18U	BRCA
P63104	YWHAZ	39	A18U	BRCA
Q00839	HNRNPU	24	A18U	BRCA
Q92597	NDRG1	13	A18U	BRCA
O95758	ROD1	19	A18V	BRCA
P02751	FN1	50	A18V	BRCA
P08238	HSP90AB1	21	A18V	BRCA
P11021	HSPA5	14	A18V	BRCA
P21333	FLNA	14	A18V	BRCA
P35222	CTNNB1	10	A18V	BRCA
P35579	MYH9	21	A18V	BRCA
P46940	IQGAP1	13	A18V	BRCA
P62140	PPP1CB	13	A18V	BRCA
P63104	YWHAZ	32	A18V	BRCA
O15264	MAPK13	24	A1EN	BRCA
P02751	FN1	31	A1EN	BRCA
P04626	ERBB2	24	A1EN	BRCA
P08238	HSP90AB1	13	A1EN	BRCA
P11021	HSPA5	8	A1EN	BRCA
P21860	ERBB3	8	A1EN	BRCA
P27824	CANX	7	A1EN	BRCA
P31749	AKT1	10	A1EN	BRCA
P60709	ACTB	18	A1EN	BRCA
P63104	YWHAZ	25	A1EN	BRCA
P02751	FN1	26	A1EO	BRCA
P03372	ESR1	40	A1EO	BRCA
P04626	ERBB2	14	A1EO	BRCA
P08238	HSP90AB1	16	A1EO	BRCA
P21333	FLNA	15	A1EO	BRCA
P31946	YWHAB	8	A1EO	BRCA
P35579	MYH9	16	A1EO	BRCA
P46940	IQGAP1	10	A1EO	BRCA
P60709	ACTB	8	A1EO	BRCA
P63104	YWHAZ	24	A1EO	BRCA
P01100	FOS	4	A1EU	BRCA
P02751	FN1	12	A1EU	BRCA
P03372	ESR1	18	A1EU	BRCA
P21860	ERBB3	5	A1EU	BRCA
P35555	FBN1	3	A1EU	BRCA
P42224	STAT1	4	A1EU	BRCA
P45973	CBX5	4	A1EU	BRCA
P55317	FOXA1	3	A1EU	BRCA
P60953	CDC42	4	A1EU	BRCA
Q15154	PCM1	3	A1EU	BRCA
P02751	FN1	41	A1EV	BRCA
P03372	ESR1	52	A1EV	BRCA
P04626	ERBB2	17	A1EV	BRCA
P08238	HSP90AB1	17	A1EV	BRCA
P21333	FLNA	14	A1EV	BRCA
P35579	MYH9	20	A1EV	BRCA
P46940	IQGAP1	12	A1EV	BRCA
P60709	ACTB	19	A1EV	BRCA
P62993	GRB2	46	A1EV	BRCA
Q92614	MYO18A	16	A1EV	BRCA
O95758	ROD1	13	A1F2	BRCA
P02751	FN1	45	A1F2	BRCA
P04626	ERBB2	21	A1F2	BRCA
P04792	HSPB1	11	A1F2	BRCA
P08238	HSP90AB1	14	A1F2	BRCA
P11021	HSPA5	10	A1F2	BRCA
P46940	IQGAP1	13	A1F2	BRCA
P60709	ACTB	15	A1F2	BRCA
P62140	PPP1CB	11	A1F2	BRCA
P63104	YWHAZ	24	A1F2	BRCA
O95758	ROD1	25	A1FC	BRCA
P01106	MYC	45	A1FC	BRCA
P02751	FN1	49	A1FC	BRCA
P06748	NPM1	26	A1FC	BRCA
P08238	HSP90AB1	19	A1FC	BRCA
P51858	HDGF	13	A1FC	BRCA
P62140	PPP1CB	12	A1FC	BRCA
P63104	YWHAZ	34	A1FC	BRCA
Q00839	HNRNPU	29	A1FC	BRCA
Q71U36	TUBA1A	24	A1FC	BRCA
P02751	FN1	47	A1FN	BRCA
P03372	ESR1	56	A1FN	BRCA
P08238	HSP90AB1	19	A1FN	BRCA
P21333	FLNA	14	A1FN	BRCA
P35579	MYH9	16	A1FN	BRCA
P60709	ACTB	23	A1FN	BRCA
P63104	YWHAZ	33	A1FN	BRCA
P67809	YBX1	19	A1FN	BRCA
Q13509	TUBB4	22	A1FN	BRCA
Q71U36	TUBA1A	20	A1FN	BRCA
P02751	FN1	41	A1FU	BRCA
P04626	ERBB2	23	A1FU	BRCA
P06748	NPM1	21	A1FU	BRCA
P08238	HSP90AB1	14	A1FU	BRCA
P35579	MYH9	18	A1FU	BRCA
P46940	IQGAP1	13	A1FU	BRCA
P60709	ACTB	27	A1FU	BRCA
P63104	YWHAZ	32	A1FU	BRCA
P67809	YBX1	19	A1FU	BRCA
Q16643	DBN1	13	A1FU	BRCA
P02751	FN1	30	A1IG	BRCA
P03372	ESR1	38	A1IG	BRCA
P04626	ERBB2	12	A1IG	BRCA
P04792	HSPB1	11	A1IG	BRCA
P08238	HSP90AB1	10	A1IG	BRCA
P51858	HDGF	8	A1IG	BRCA
P60709	ACTB	14	A1IG	BRCA
P62993	GRB2	37	A1IG	BRCA
Q00839	HNRNPU	12	A1IG	BRCA
Q13509	TUBB4	8	A1IG	BRCA
P02751	FN1	41	A1L7	BRCA
P03372	ESR1	52	A1L7	BRCA
P06748	NPM1	9	A1L7	BRCA
P07900	HSP90AA1	9	A1L7	BRCA
P08238	HSP90AB1	13	A1L7	BRCA
P11021	HSPA5	13	A1L7	BRCA
P51858	HDGF	14	A1L7	BRCA
P63104	YWHAZ	31	A1L7	BRCA
P67809	YBX1	20	A1L7	BRCA
Q71U36	TUBA1A	18	A1L7	BRCA
P02751	FN1	47	A1LB	BRCA
P04626	ERBB2	26	A1LB	BRCA
P04792	HSPB1	13	A1LB	BRCA
P07900	HSP90AA1	10	A1LB	BRCA
P11021	HSPA5	11	A1LB	BRCA
P27824	CANX	7	A1LB	BRCA
P60709	ACTB	21	A1LB	BRCA
P60953	CDC42	6	A1LB	BRCA
Q92614	MYO18A	21	A1LB	BRCA
Q9UHB6	LIMA1	13	A1LB	BRCA
P01023	A2M	8	A1LH	BRCA
P02751	FN1	46	A1LH	BRCA
P04792	HSPB1	13	A1LH	BRCA
P06748	NPM1	12	A1LH	BRCA
P11021	HSPA5	8	A1LH	BRCA
P35579	MYH9	21	A1LH	BRCA
P60709	ACTB	20	A1LH	BRCA
P62136	PPP1CA	7	A1LH	BRCA
P63104	YWHAZ	32	A1LH	BRCA
P67809	YBX1	13	A1LH	BRCA
O95758	ROD1	21	A1LS	BRCA
P06748	NPM1	44	A1LS	BRCA
P11021	HSPA5	11	A1LS	BRCA
P27635	RPL10	53	A1LS	BRCA
P46940	IQGAP1	14	A1LS	BRCA
P51858	HDGF	17	A1LS	BRCA
P60709	ACTB	32	A1LS	BRCA
P62140	PPP1CB	11	A1LS	BRCA
P63104	YWHAZ	26	A1LS	BRCA
Q00839	HNRNPU	43	A1LS	BRCA
O75787	ATP6AP2	12	A1N4	BRCA
P02751	FN1	44	A1N4	BRCA
P11021	HSPA5	8	A1N4	BRCA
P21333	FLNA	18	A1N4	BRCA
P27824	CANX	8	A1N4	BRCA
P38606	ATP6V1A	13	A1N4	BRCA
P60709	ACTB	19	A1N4	BRCA
P61160	ACTR2	7	A1N4	BRCA
P67809	YBX1	7	A1N4	BRCA
Q13501	SQSTM1	6	A1N4	BRCA
P02751	FN1	24	A1N5	BRCA
P03372	ESR1	30	A1N5	BRCA
P04792	HSPB1	7	A1N5	BRCA
P08238	HSP90AB1	11	A1N5	BRCA
P0CG48	UBC	6	A1N5	BRCA
P21860	ERBB3	6	A1N5	BRCA
P60709	ACTB	10	A1N5	BRCA
P62136	PPP1CA	8	A1N5	BRCA
P63104	YWHAZ	18	A1N5	BRCA
Q71U36	TUBA1A	6	A1N5	BRCA
P02751	FN1	47	A1N6	BRCA
P03372	ESR1	55	A1N6	BRCA
P04626	ERBB2	19	A1N6	BRCA
P08238	HSP90AB1	17	A1N6	BRCA
P11021	HSPA5	17	A1N6	BRCA
P35579	MYH9	20	A1N6	BRCA
P60709	ACTB	20	A1N6	BRCA
P63104	YWHAZ	36	A1N6	BRCA
Q13509	TUBB4	21	A1N6	BRCA
Q16643	DBN1	14	A1N6	BRCA
P02751	FN1	54	A1N9	BRCA
P03372	ESR1	75	A1N9	BRCA
P06748	NPM1	35	A1N9	BRCA
P08238	HSP90AB1	18	A1N9	BRCA
P15336	ATF2	32	A1N9	BRCA
P27635	RPL10	43	A1N9	BRCA
P63104	YWHAZ	32	A1N9	BRCA
P68400	CSNK2A1	17	A1N9	BRCA
Q00839	HNRNPU	39	A1N9	BRCA
Q71U36	TUBA1A	23	A1N9	BRCA
P02751	FN1	41	A1NA	BRCA
P03372	ESR1	59	A1NA	BRCA
P06748	NPM1	22	A1NA	BRCA
P08238	HSP90AB1	13	A1NA	BRCA
P27635	RPL10	30	A1NA	BRCA
P38919	EIF4A3	13	A1NA	BRCA
P60709	ACTB	32	A1NA	BRCA
P63104	YWHAZ	36	A1NA	BRCA
Q00839	HNRNPU	28	A1NA	BRCA
Q71U36	TUBA1A	18	A1NA	BRCA
O14879	IFIT3	8	A1ND	BRCA
P02751	FN1	31	A1ND	BRCA
P07900	HSP90AA1	8	A1ND	BRCA
P08238	HSP90AB1	11	A1ND	BRCA
P11021	HSPA5	13	A1ND	BRCA
P51617	IRAK1	8	A1ND	BRCA
P51858	HDGF	9	A1ND	BRCA
P62140	PPP1CB	10	A1ND	BRCA
P63104	YWHAZ	28	A1ND	BRCA
Q13509	TUBB4	19	A1ND	BRCA
P02751	FN1	56	A1NF	BRCA
P03372	ESR1	75	A1NF	BRCA
P04626	ERBB2	16	A1NF	BRCA
P06748	NPM1	44	A1NF	BRCA
P08238	HSP90AB1	22	A1NF	BRCA
P27635	RPL10	51	A1NF	BRCA
P35579	MYH9	19	A1NF	BRCA
P60709	ACTB	34	A1NF	BRCA
P63104	YWHAZ	37	A1NF	BRCA
Q71U36	TUBA1A	16	A1NF	BRCA
P02751	FN1	34	A1NG	BRCA
P04626	ERBB2	15	A1NG	BRCA
P04792	HSPB1	12	A1NG	BRCA
P08238	HSP90AB1	17	A1NG	BRCA
P11021	HSPA5	11	A1NG	BRCA
P19320	VCAM1	57	A1NG	BRCA
P21333	FLNA	20	A1NG	BRCA
P35579	MYH9	27	A1NG	BRCA
P60709	ACTB	18	A1NG	BRCA
Q71U36	TUBA1A	15	A1NG	BRCA
O95758	ROD1	12	A1R7	BRCA
P02751	FN1	30	A1R7	BRCA
P03372	ESR1	49	A1R7	BRCA
P04626	ERBB2	15	A1R7	BRCA
P04792	HSPB1	15	A1R7	BRCA
P08238	HSP90AB1	17	A1R7	BRCA
P11387	TOP1	12	A1R7	BRCA
P43243	MATR3	11	A1R7	BRCA
P63104	YWHAZ	29	A1R7	BRCA
Q00839	HNRNPU	10	A1R7	BRCA
P02751	FN1	48	A1RB	BRCA
P03372	ESR1	67	A1RB	BRCA
P11021	HSPA5	15	A1RB	BRCA
P12004	PCNA	8	A1RB	BRCA
P45973	CBX5	11	A1RB	BRCA
P51858	HDGF	15	A1RB	BRCA
P60709	ACTB	22	A1RB	BRCA
P63104	YWHAZ	34	A1RB	BRCA
Q00839	HNRNPU	17	A1RB	BRCA
Q13547	HDAC1	13	A1RB	BRCA
P02751	FN1	30	A1RC	BRCA
P03372	ESR1	48	A1RC	BRCA
P04626	ERBB2	15	A1RC	BRCA
P06748	NPM1	8	A1RC	BRCA
P07900	HSP90AA1	12	A1RC	BRCA
P08238	HSP90AB1	17	A1RC	BRCA
P51858	HDGF	9	A1RC	BRCA
P60709	ACTB	16	A1RC	BRCA
P63104	YWHAZ	28	A1RC	BRCA
Q00839	HNRNPU	12	A1RC	BRCA
P02751	FN1	21	A1RD	BRCA
P03372	ESR1	42	A1RD	BRCA
P04626	ERBB2	12	A1RD	BRCA
P05067	APP	8	A1RD	BRCA
P07900	HSP90AA1	8	A1RD	BRCA
P08238	HSP90AB1	14	A1RD	BRCA
P21860	ERBB3	9	A1RD	BRCA
P43243	MATR3	7	A1RD	BRCA
P60709	ACTB	17	A1RD	BRCA
Q15154	PCM1	5	A1RD	BRCA
P02751	FN1	64	A1RF	BRCA
P03372	ESR1	87	A1RF	BRCA
P06748	NPM1	43	A1RF	BRCA
P08238	HSP90AB1	23	A1RF	BRCA
P27635	RPL10	47	A1RF	BRCA
P35579	MYH9	20	A1RF	BRCA
P60709	ACTB	36	A1RF	BRCA
P63104	YWHAZ	43	A1RF	BRCA
Q00839	HNRNPU	44	A1RF	BRCA
Q13509	TUBB4	23	A1RF	BRCA
O95758	ROD1	20	A1RH	BRCA
P00533	EGFR	39	A1RH	BRCA
P02751	FN1	61	A1RH	BRCA
P04792	HSPB1	18	A1RH	BRCA
P11021	HSPA5	15	A1RH	BRCA
P35579	MYH9	19	A1RH	BRCA
P60709	ACTB	19	A1RH	BRCA
P62140	PPP1CB	15	A1RH	BRCA
P63104	YWHAZ	37	A1RH	BRCA
Q00839	HNRNPU	14	A1RH	BRCA
P02751	FN1	28	A1RI	BRCA
P03372	ESR1	41	A1RI	BRCA
P04626	ERBB2	14	A1RI	BRCA
P05067	APP	9	A1RI	BRCA
P07900	HSP90AA1	8	A1RI	BRCA
P08238	HSP90AB1	15	A1RI	BRCA
P35579	MYH9	14	A1RI	BRCA
P60709	ACTB	19	A1RI	BRCA
Q00839	HNRNPU	14	A1RI	BRCA
Q71U36	TUBA1A	12	A1RI	BRCA
P02751	FN1	46	A203	BRCA
P11021	HSPA5	14	A203	BRCA
P31749	AKT1	10	A203	BRCA
P35579	MYH9	13	A203	BRCA
P38919	EIF4A3	13	A203	BRCA
P51858	HDGF	13	A203	BRCA
P60709	ACTB	22	A203	BRCA
P61160	ACTR2	10	A203	BRCA
P63104	YWHAZ	35	A203	BRCA
Q00839	HNRNPU	19	A203	BRCA
O95758	ROD1	22	A204	BRCA
P02751	FN1	39	A204	BRCA
P03372	ESR1	60	A204	BRCA
P04637	TP53	28	A204	BRCA
P06748	NPM1	14	A204	BRCA
P08238	HSP90AB1	13	A204	BRCA
P11021	HSPA5	10	A204	BRCA
P63104	YWHAZ	28	A204	BRCA
P78362	SRPK2	13	A204	BRCA
Q00839	HNRNPU	12	A204	BRCA
O75787	ATP6AP2	7	A208	BRCA
P02751	FN1	45	A208	BRCA
P04792	HSPB1	15	A208	BRCA
P11021	HSPA5	14	A208	BRCA
P21333	FLNA	21	A208	BRCA
P35579	MYH9	31	A208	BRCA
P60709	ACTB	17	A208	BRCA
P63104	YWHAZ	26	A208	BRCA
P67809	YBX1	8	A208	BRCA
Q13418	ILK	9	A208	BRCA
P02751	FN1	39	A23H	BRCA
P04626	ERBB2	22	A23H	BRCA
P08238	HSP90AB1	17	A23H	BRCA
P11021	HSPA5	11	A23H	BRCA
P21333	FLNA	17	A23H	BRCA
P35579	MYH9	21	A23H	BRCA
P60709	ACTB	17	A23H	BRCA
P62136	PPP1CA	10	A23H	BRCA
P62993	GRB2	50	A23H	BRCA
P63104	YWHAZ	30	A23H	BRCA
O00159	MYO1C	9	A2C8	BRCA
P02751	FN1	25	A2C8	BRCA
P03372	ESR1	40	A2C8	BRCA
P05067	APP	9	A2C8	BRCA
P11021	HSPA5	9	A2C8	BRCA
P21333	FLNA	18	A2C8	BRCA
P35579	MYH9	26	A2C8	BRCA
P46940	IQGAP1	17	A2C8	BRCA
P60709	ACTB	11	A2C8	BRCA
P63104	YWHAZ	24	A2C8	BRCA
O14879	IFIT3	5	A2FB	BRCA
O95758	ROD1	6	A2FB	BRCA
P02751	FN1	19	A2FB	BRCA
P04626	ERBB2	11	A2FB	BRCA
P10276	RARA	7	A2FB	BRCA
P21860	ERBB3	7	A2FB	BRCA
P31946	YWHAB	7	A2FB	BRCA
P61769	B2M	5	A2FB	BRCA
P62993	GRB2	27	A2FB	BRCA
Q00839	HNRNPU	6	A2FB	BRCA
P02751	FN1	10	A2FF	BRCA
P04626	ERBB2	4	A2FF	BRCA
P08670	VIM	4	A2FF	BRCA
P0CG48	UBC	3	A2FF	BRCA
P27635	RPL10	5	A2FF	BRCA
P28300	LOX	5	A2FF	BRCA
P35555	FBN1	3	A2FF	BRCA
P46940	IQGAP1	3	A2FF	BRCA
P60953	CDC42	5	A2FF	BRCA
P62993	GRB2	16	A2FF	BRCA

## Sheet: THCA
Target Uniprotkb	Target Genesymbol	Connections	Patient	Tissue		Target Uniprotkb	Target Genesymbol	N patients THCA
P02751	FN1	19	A1CS	THCA		P02751	FN1	47
P04626	ERBB2	7	A1CS	THCA		Q5S007	LRRK2	41
P07900	HSP90AA1	9	A1CS	THCA		P21333	FLNA	39
P08238	HSP90AB1	13	A1CS	THCA		P27635	RPL10	27
P21333	FLNA	9	A1CS	THCA		P35579	MYH9	25
P35222	CTNNB1	6	A1CS	THCA		P46940	IQGAP1	24
P35579	MYH9	14	A1CS	THCA		P08238	HSP90AB1	24
P46937	YAP1	5	A1CS	THCA		P04626	ERBB2	23
P46940	IQGAP1	8	A1CS	THCA		P60709	ACTB	22
Q5S007	LRRK2	9	A1CS	THCA		O95166	GABARAP	21
O00159	MYO1C	8	A1CT	THCA		P04792	HSPB1	21
P02751	FN1	25	A1CT	THCA		P06748	NPM1	20
P08238	HSP90AB1	11	A1CT	THCA		P63104	YWHAZ	20
P18206	VCL	6	A1CT	THCA		P62280	RPS11	19
P21333	FLNA	14	A1CT	THCA		P08670	VIM	13
P35579	MYH9	18	A1CT	THCA		P35222	CTNNB1	10
P46940	IQGAP1	13	A1CT	THCA		Q8N3V7	SYNPO	8
P60709	ACTB	7	A1CT	THCA		P01023	A2M	6
Q14847	LASP1	5	A1CT	THCA		P26641	EEF1G	6
Q5S007	LRRK2	16	A1CT	THCA		O00159	MYO1C	5
P02751	FN1	49	A1CU	THCA		P03372	ESR1	5
P04626	ERBB2	12	A1CU	THCA		P12830	CDH1	5
P21333	FLNA	23	A1CU	THCA		P46937	YAP1	5
P27635	RPL10	36	A1CU	THCA		P62140	PPP1CB	5
P35579	MYH9	33	A1CU	THCA		P63244	GNB2L1	5
P46940	IQGAP1	18	A1CU	THCA		Q13501	SQSTM1	5
P60709	ACTB	32	A1CU	THCA		O14503	BHLHE40	4
P63104	YWHAZ	27	A1CU	THCA		P0CG48	UBC	4
Q5S007	LRRK2	38	A1CU	THCA		P14618	PKM2	4
Q8N3V7	SYNPO	20	A1CU	THCA		P30101	PDIA3	4
P02751	FN1	22	A1CV	THCA		P21860	ERBB3	3
P04626	ERBB2	7	A1CV	THCA		P55209	NAP1L1	3
P08238	HSP90AB1	11	A1CV	THCA		Q71U36	TUBA1A	3
P21333	FLNA	9	A1CV	THCA		P04083	ANXA1	2
P28482	MAPK1	5	A1CV	THCA		P04406	GAPDH	2
P35579	MYH9	14	A1CV	THCA		P05412	JUN	2
P42858	HTT	7	A1CV	THCA		P08581	MET	2
P46940	IQGAP1	7	A1CV	THCA		P09651	HNRNPA1	2
P62140	PPP1CB	8	A1CV	THCA		P11021	HSPA5	2
Q5S007	LRRK2	10	A1CV	THCA		P16070	CD44	2
P01023	A2M	8	A1CW	THCA		P21926	CD9	2
P04792	HSPB1	8	A1CW	THCA		P27824	CANX	2
P08670	VIM	6	A1CW	THCA		P29692	EEF1D	2
P18848	ATF4	5	A1CW	THCA		P31946	YWHAB	2
P21333	FLNA	10	A1CW	THCA		P46379	BAT3	2
P26641	EEF1G	6	A1CW	THCA		P62136	PPP1CA	2
P27635	RPL10	31	A1CW	THCA		Q00610	CLTC	2
P35579	MYH9	12	A1CW	THCA		Q00839	HNRNPU	2
P60709	ACTB	22	A1CW	THCA		Q00987	MDM2	2
P62280	RPS11	6	A1CW	THCA		Q08117	AES	2
P02751	FN1	45	A1JZ	THCA		Q13547	HDAC1	2
P03372	ESR1	67	A1JZ	THCA		Q14240	EIF4A2	2
P06748	NPM1	45	A1JZ	THCA		O00560	SDCBP	1
P08238	HSP90AB1	20	A1JZ	THCA		P04075	ALDOA	1
P21333	FLNA	15	A1JZ	THCA		P05067	APP	1
P27635	RPL10	54	A1JZ	THCA		P05141	SLC25A5	1
P60709	ACTB	39	A1JZ	THCA		P05556	ITGB1	1
Q00987	MDM2	18	A1JZ	THCA		P07900	HSP90AA1	1
Q16643	DBN1	15	A1JZ	THCA		P08575	PTPRC	1
Q5S007	LRRK2	47	A1JZ	THCA		P10644	PRKAR1A	1
P02751	FN1	27	A1YC	THCA		P15692	VEGFA	1
P05141	SLC25A5	4	A1YC	THCA		P17096	HMGA1	1
P06748	NPM1	12	A1YC	THCA		P17948	FLT1	1
P08238	HSP90AB1	10	A1YC	THCA		P18206	VCL	1
P27635	RPL10	12	A1YC	THCA		P18848	ATF4	1
P31946	YWHAB	5	A1YC	THCA		P19338	NCL	1
P46937	YAP1	3	A1YC	THCA		P28482	MAPK1	1
Q00610	CLTC	3	A1YC	THCA		P31749	AKT1	1
Q01968	OCRL	12	A1YC	THCA		P34741	SDC2	1
Q14686	NCOA6	3	A1YC	THCA		P38606	ATP6V1A	1
P02751	FN1	40	A28R	THCA		P38936	CDKN1A	1
P04792	HSPB1	11	A28R	THCA		P40763	STAT3	1
P06748	NPM1	24	A28R	THCA		P42858	HTT	1
P08238	HSP90AB1	19	A28R	THCA		P51858	HDGF	1
P21333	FLNA	18	A28R	THCA		P61978	HNRNPK	1
P35579	MYH9	22	A28R	THCA		P63000	RAC1	1
P46940	IQGAP1	15	A28R	THCA		P67809	YBX1	1
P60709	ACTB	24	A28R	THCA		P68104	EEF1A1	1
P63104	YWHAZ	26	A28R	THCA		Q01968	OCRL	1
Q5S007	LRRK2	33	A28R	THCA		Q04637	EIF4G1	1
P09651	HNRNPA1	7	A28W	THCA		Q12873	CHD3	1
P17096	HMGA1	5	A28W	THCA		Q13153	PAK1	1
P19338	NCL	4	A28W	THCA		Q14103	HNRNPD	1
P26641	EEF1G	4	A28W	THCA		Q14204	DYNC1H1	1
P27635	RPL10	61	A28W	THCA		Q14686	NCOA6	1
P55209	NAP1L1	4	A28W	THCA		Q14847	LASP1	1
P60709	ACTB	37	A28W	THCA		Q16531	DDB1	1
P62280	RPS11	9	A28W	THCA		Q16643	DBN1	1
Q14103	HNRNPD	5	A28W	THCA		Q16665	HIF1A	1
Q9UH99	SUN2	4	A28W	THCA		Q7L5N1	COPS6	1
O95166	GABARAP	23	A28X	THCA		Q96CW1	AP2M1	1
P02751	FN1	29	A28X	THCA		Q9C009	FOXQ1	1
P04626	ERBB2	10	A28X	THCA		Q9UBU9	NXF1	1
P08238	HSP90AB1	12	A28X	THCA		Q9UH99	SUN2	1
P12830	CDH1	8	A28X	THCA
P21333	FLNA	19	A28X	THCA
P46940	IQGAP1	13	A28X	THCA
P63104	YWHAZ	24	A28X	THCA
Q5S007	LRRK2	23	A28X	THCA
Q71U36	TUBA1A	7	A28X	THCA
P02751	FN1	47	A290	THCA
P03372	ESR1	67	A290	THCA
P06748	NPM1	42	A290	THCA
P08238	HSP90AB1	16	A290	THCA
P21333	FLNA	15	A290	THCA
P27635	RPL10	46	A290	THCA
P51858	HDGF	12	A290	THCA
P63104	YWHAZ	23	A290	THCA
Q00839	HNRNPU	39	A290	THCA
Q5S007	LRRK2	43	A290	THCA
P01023	A2M	8	A2C6	THCA
P02751	FN1	31	A2C6	THCA
P04792	HSPB1	10	A2C6	THCA
P08238	HSP90AB1	14	A2C6	THCA
P21333	FLNA	15	A2C6	THCA
P46379	BAT3	9	A2C6	THCA
P46940	IQGAP1	13	A2C6	THCA
Q5S007	LRRK2	16	A2C6	THCA
Q71U36	TUBA1A	10	A2C6	THCA
Q8N3V7	SYNPO	11	A2C6	THCA
O14503	BHLHE40	5	A2JQ	THCA
O95166	GABARAP	48	A2JQ	THCA
P02751	FN1	34	A2JQ	THCA
P04626	ERBB2	11	A2JQ	THCA
P04792	HSPB1	7	A2JQ	THCA
P05412	JUN	73	A2JQ	THCA
P0CG48	UBC	7	A2JQ	THCA
P21333	FLNA	13	A2JQ	THCA
P60709	ACTB	27	A2JQ	THCA
P62280	RPS11	8	A2JQ	THCA
O00560	SDCBP	5	A2K9	THCA
P05067	APP	6	A2K9	THCA
P08670	VIM	6	A2K9	THCA
P46937	YAP1	4	A2K9	THCA
P63104	YWHAZ	12	A2K9	THCA
P67809	YBX1	8	A2K9	THCA
Q00987	MDM2	6	A2K9	THCA
Q04637	EIF4G1	4	A2K9	THCA
Q13501	SQSTM1	6	A2K9	THCA
Q5S007	LRRK2	15	A2K9	THCA
O95166	GABARAP	58	A2N7	THCA
P01023	A2M	5	A2N7	THCA
P02751	FN1	37	A2N7	THCA
P04792	HSPB1	8	A2N7	THCA
P06748	NPM1	43	A2N7	THCA
P08238	HSP90AB1	11	A2N7	THCA
P08670	VIM	6	A2N7	THCA
P27635	RPL10	49	A2N7	THCA
P62280	RPS11	8	A2N7	THCA
Q5S007	LRRK2	39	A2N7	THCA
O95166	GABARAP	71	A2N8	THCA
P02751	FN1	38	A2N8	THCA
P04406	GAPDH	5	A2N8	THCA
P06748	NPM1	45	A2N8	THCA
P08670	VIM	6	A2N8	THCA
P26641	EEF1G	5	A2N8	THCA
P27635	RPL10	54	A2N8	THCA
P60709	ACTB	37	A2N8	THCA
P62280	RPS11	10	A2N8	THCA
Q5S007	LRRK2	43	A2N8	THCA
O95166	GABARAP	71	A2N9	THCA
P04792	HSPB1	8	A2N9	THCA
P06748	NPM1	43	A2N9	THCA
P08238	HSP90AB1	12	A2N9	THCA
P08670	VIM	6	A2N9	THCA
P0CG48	UBC	7	A2N9	THCA
P12830	CDH1	5	A2N9	THCA
P62280	RPS11	7	A2N9	THCA
Q13501	SQSTM1	7	A2N9	THCA
Q7L5N1	COPS6	4	A2N9	THCA
P02751	FN1	25	A2NA	THCA
P04626	ERBB2	11	A2NA	THCA
P08581	MET	5	A2NA	THCA
P21333	FLNA	17	A2NA	THCA
P21860	ERBB3	7	A2NA	THCA
P35222	CTNNB1	7	A2NA	THCA
P46940	IQGAP1	10	A2NA	THCA
P63104	YWHAZ	15	A2NA	THCA
Q16665	HIF1A	4	A2NA	THCA
Q5S007	LRRK2	16	A2NA	THCA
P02751	FN1	45	A3DP	THCA
P04626	ERBB2	11	A3DP	THCA
P08238	HSP90AB1	21	A3DP	THCA
P21333	FLNA	15	A3DP	THCA
P35222	CTNNB1	8	A3DP	THCA
P35579	MYH9	24	A3DP	THCA
P46940	IQGAP1	13	A3DP	THCA
Q5S007	LRRK2	33	A3DP	THCA
Q8N3V7	SYNPO	15	A3DP	THCA
Q9C009	FOXQ1	7	A3DP	THCA
O00159	MYO1C	6	A3DW	THCA
P02751	FN1	30	A3DW	THCA
P06748	NPM1	27	A3DW	THCA
P21333	FLNA	16	A3DW	THCA
P35222	CTNNB1	5	A3DW	THCA
P35579	MYH9	23	A3DW	THCA
P46940	IQGAP1	11	A3DW	THCA
P60709	ACTB	20	A3DW	THCA
P63244	GNB2L1	5	A3DW	THCA
Q5S007	LRRK2	28	A3DW	THCA
P02751	FN1	38	A3GZ	THCA
P03372	ESR1	52	A3GZ	THCA
P04792	HSPB1	12	A3GZ	THCA
P06748	NPM1	34	A3GZ	THCA
P08238	HSP90AB1	16	A3GZ	THCA
P21333	FLNA	14	A3GZ	THCA
P35579	MYH9	19	A3GZ	THCA
P63104	YWHAZ	26	A3GZ	THCA
Q5S007	LRRK2	34	A3GZ	THCA
Q71U36	TUBA1A	11	A3GZ	THCA
P01023	A2M	6	A3H2	THCA
P04075	ALDOA	3	A3H2	THCA
P0CG48	UBC	3	A3H2	THCA
P11021	HSPA5	3	A3H2	THCA
P14618	PKM2	5	A3H2	THCA
P15692	VEGFA	3	A3H2	THCA
P17948	FLT1	3	A3H2	THCA
P30101	PDIA3	3	A3H2	THCA
P60709	ACTB	7	A3H2	THCA
Q13501	SQSTM1	3	A3H2	THCA
O00159	MYO1C	5	A3H7	THCA
O14503	BHLHE40	6	A3H7	THCA
O95166	GABARAP	49	A3H7	THCA
P02751	FN1	43	A3H7	THCA
P04626	ERBB2	12	A3H7	THCA
P21333	FLNA	15	A3H7	THCA
P27635	RPL10	33	A3H7	THCA
P35222	CTNNB1	4	A3H7	THCA
P35579	MYH9	19	A3H7	THCA
Q5S007	LRRK2	31	A3H7	THCA
O95166	GABARAP	61	A3MW	THCA
P02751	FN1	39	A3MW	THCA
P06748	NPM1	43	A3MW	THCA
P08238	HSP90AB1	13	A3MW	THCA
P08670	VIM	6	A3MW	THCA
P26641	EEF1G	6	A3MW	THCA
P27635	RPL10	46	A3MW	THCA
P62280	RPS11	7	A3MW	THCA
Q13501	SQSTM1	4	A3MW	THCA
Q5S007	LRRK2	38	A3MW	THCA
O95166	GABARAP	80	A3MX	THCA
P02751	FN1	57	A3MX	THCA
P03372	ESR1	65	A3MX	THCA
P04083	ANXA1	7	A3MX	THCA
P04626	ERBB2	8	A3MX	THCA
P06748	NPM1	53	A3MX	THCA
P09651	HNRNPA1	6	A3MX	THCA
P27635	RPL10	60	A3MX	THCA
P62280	RPS11	8	A3MX	THCA
P63104	YWHAZ	25	A3MX	THCA
P02751	FN1	54	A3MY	THCA
P06748	NPM1	40	A3MY	THCA
P08238	HSP90AB1	19	A3MY	THCA
P21333	FLNA	22	A3MY	THCA
P27635	RPL10	45	A3MY	THCA
P35579	MYH9	29	A3MY	THCA
P46940	IQGAP1	18	A3MY	THCA
P60709	ACTB	38	A3MY	THCA
P62140	PPP1CB	16	A3MY	THCA
P63104	YWHAZ	31	A3MY	THCA
P02751	FN1	37	A3N2	THCA
P21333	FLNA	16	A3N2	THCA
P38606	ATP6V1A	9	A3N2	THCA
P46940	IQGAP1	10	A3N2	THCA
P60709	ACTB	22	A3N2	THCA
P62140	PPP1CB	11	A3N2	THCA
P63104	YWHAZ	19	A3N2	THCA
Q00839	HNRNPU	17	A3N2	THCA
Q13547	HDAC1	5	A3N2	THCA
Q5S007	LRRK2	21	A3N2	THCA
O00159	MYO1C	9	A3N3	THCA
P02751	FN1	30	A3N3	THCA
P04626	ERBB2	11	A3N3	THCA
P08670	VIM	5	A3N3	THCA
P12830	CDH1	6	A3N3	THCA
P21333	FLNA	18	A3N3	THCA
P35222	CTNNB1	5	A3N3	THCA
P35579	MYH9	20	A3N3	THCA
P46940	IQGAP1	13	A3N3	THCA
Q5S007	LRRK2	19	A3N3	THCA
P02751	FN1	20	A3PR	THCA
P05556	ITGB1	4	A3PR	THCA
P08575	PTPRC	3	A3PR	THCA
P08581	MET	3	A3PR	THCA
P14618	PKM2	3	A3PR	THCA
P16070	CD44	3	A3PR	THCA
P21333	FLNA	9	A3PR	THCA
P35579	MYH9	12	A3PR	THCA
P46940	IQGAP1	6	A3PR	THCA
P60709	ACTB	7	A3PR	THCA
O95166	GABARAP	78	A3PU	THCA
P02751	FN1	54	A3PU	THCA
P04626	ERBB2	12	A3PU	THCA
P04792	HSPB1	16	A3PU	THCA
P06748	NPM1	48	A3PU	THCA
P08238	HSP90AB1	15	A3PU	THCA
P21333	FLNA	15	A3PU	THCA
P27635	RPL10	57	A3PU	THCA
P60709	ACTB	39	A3PU	THCA
P62140	PPP1CB	13	A3PU	THCA
P02751	FN1	39	A3RI	THCA
P06748	NPM1	37	A3RI	THCA
P08238	HSP90AB1	11	A3RI	THCA
P21333	FLNA	10	A3RI	THCA
P21860	ERBB3	5	A3RI	THCA
P27635	RPL10	44	A3RI	THCA
P35222	CTNNB1	6	A3RI	THCA
P46379	BAT3	7	A3RI	THCA
P46940	IQGAP1	9	A3RI	THCA
P62280	RPS11	8	A3RI	THCA
P03372	ESR1	37	A3ST	THCA
P04083	ANXA1	4	A3ST	THCA
P04406	GAPDH	4	A3ST	THCA
P04626	ERBB2	5	A3ST	THCA
P08670	VIM	6	A3ST	THCA
P55209	NAP1L1	3	A3ST	THCA
P62280	RPS11	4	A3ST	THCA
P63104	YWHAZ	11	A3ST	THCA
Q13153	PAK1	3	A3ST	THCA
Q5S007	LRRK2	27	A3ST	THCA
P02751	FN1	27	A3T0	THCA
P04792	HSPB1	11	A3T0	THCA
P08238	HSP90AB1	14	A3T0	THCA
P14618	PKM2	8	A3T0	THCA
P21333	FLNA	13	A3T0	THCA
P35579	MYH9	24	A3T0	THCA
P46940	IQGAP1	15	A3T0	THCA
P60709	ACTB	18	A3T0	THCA
Q5S007	LRRK2	17	A3T0	THCA
Q8N3V7	SYNPO	16	A3T0	THCA
P02751	FN1	31	A3T1	THCA
P04626	ERBB2	11	A3T1	THCA
P21333	FLNA	12	A3T1	THCA
P21860	ERBB3	5	A3T1	THCA
P27635	RPL10	33	A3T1	THCA
P35222	CTNNB1	6	A3T1	THCA
P46940	IQGAP1	5	A3T1	THCA
P62280	RPS11	5	A3T1	THCA
P63244	GNB2L1	4	A3T1	THCA
Q5S007	LRRK2	28	A3T1	THCA
P02751	FN1	14	A3T2	THCA
P11021	HSPA5	9	A3T2	THCA
P21926	CD9	3	A3T2	THCA
P27824	CANX	3	A3T2	THCA
P31946	YWHAB	4	A3T2	THCA
P46937	YAP1	4	A3T2	THCA
P61978	HNRNPK	3	A3T2	THCA
P63104	YWHAZ	9	A3T2	THCA
Q14240	EIF4A2	3	A3T2	THCA
Q5S007	LRRK2	10	A3T2	THCA
P02751	FN1	43	A3T3	THCA
P08238	HSP90AB1	20	A3T3	THCA
P21333	FLNA	15	A3T3	THCA
P27635	RPL10	38	A3T3	THCA
P35579	MYH9	21	A3T3	THCA
P46940	IQGAP1	12	A3T3	THCA
P60709	ACTB	32	A3T3	THCA
P63104	YWHAZ	27	A3T3	THCA
Q5S007	LRRK2	36	A3T3	THCA
Q8N3V7	SYNPO	14	A3T3	THCA
P02751	FN1	26	A3T6	THCA
P04626	ERBB2	10	A3T6	THCA
P12830	CDH1	5	A3T6	THCA
P21333	FLNA	10	A3T6	THCA
P46940	IQGAP1	6	A3T6	THCA
P63244	GNB2L1	4	A3T6	THCA
P68104	EEF1A1	3	A3T6	THCA
Q00610	CLTC	4	A3T6	THCA
Q16531	DDB1	3	A3T6	THCA
Q5S007	LRRK2	21	A3T6	THCA
P02751	FN1	54	A3T7	THCA
P04626	ERBB2	13	A3T7	THCA
P06748	NPM1	34	A3T7	THCA
P08238	HSP90AB1	27	A3T7	THCA
P21333	FLNA	21	A3T7	THCA
P27635	RPL10	37	A3T7	THCA
P35579	MYH9	30	A3T7	THCA
P46940	IQGAP1	16	A3T7	THCA
P63104	YWHAZ	29	A3T7	THCA
Q5S007	LRRK2	37	A3T7	THCA
P02751	FN1	27	A3T8	THCA
P04626	ERBB2	9	A3T8	THCA
P08238	HSP90AB1	16	A3T8	THCA
P14618	PKM2	7	A3T8	THCA
P21333	FLNA	12	A3T8	THCA
P35579	MYH9	18	A3T8	THCA
P46940	IQGAP1	9	A3T8	THCA
P63244	GNB2L1	5	A3T8	THCA
Q5S007	LRRK2	23	A3T8	THCA
Q8N3V7	SYNPO	9	A3T8	THCA
O95166	GABARAP	50	A3TA	THCA
P02751	FN1	37	A3TA	THCA
P04792	HSPB1	8	A3TA	THCA
P08670	VIM	6	A3TA	THCA
P21333	FLNA	11	A3TA	THCA
P27635	RPL10	40	A3TA	THCA
P35579	MYH9	14	A3TA	THCA
P62280	RPS11	6	A3TA	THCA
Q5S007	LRRK2	31	A3TA	THCA
Q8N3V7	SYNPO	12	A3TA	THCA
O14503	BHLHE40	6	A3TB	THCA
P02751	FN1	43	A3TB	THCA
P04626	ERBB2	9	A3TB	THCA
P04792	HSPB1	10	A3TB	THCA
P08238	HSP90AB1	15	A3TB	THCA
P08670	VIM	7	A3TB	THCA
P27635	RPL10	46	A3TB	THCA
P62280	RPS11	9	A3TB	THCA
Q5S007	LRRK2	42	A3TB	THCA
Q9UBU9	NXF1	7	A3TB	THCA
O95166	GABARAP	53	A3TY	THCA
P01023	A2M	8	A3TY	THCA
P02751	FN1	44	A3TY	THCA
P21333	FLNA	12	A3TY	THCA
P27635	RPL10	41	A3TY	THCA
P35579	MYH9	21	A3TY	THCA
P46940	IQGAP1	12	A3TY	THCA
P60709	ACTB	33	A3TY	THCA
P63104	YWHAZ	22	A3TY	THCA
Q5S007	LRRK2	39	A3TY	THCA
P01023	A2M	6	A3ZG	THCA
P02751	FN1	36	A3ZG	THCA
P06748	NPM1	26	A3ZG	THCA
P16070	CD44	4	A3ZG	THCA
P21333	FLNA	12	A3ZG	THCA
P35579	MYH9	14	A3ZG	THCA
P46940	IQGAP1	7	A3ZG	THCA
P63244	GNB2L1	4	A3ZG	THCA
Q5S007	LRRK2	29	A3ZG	THCA
Q96CW1	AP2M1	3	A3ZG	THCA
O95166	GABARAP	20	A3ZH	THCA
P04626	ERBB2	6	A3ZH	THCA
P10644	PRKAR1A	4	A3ZH	THCA
P27824	CANX	3	A3ZH	THCA
P30101	PDIA3	5	A3ZH	THCA
P40763	STAT3	2	A3ZH	THCA
P46937	YAP1	3	A3ZH	THCA
Q12873	CHD3	3	A3ZH	THCA
Q14240	EIF4A2	2	A3ZH	THCA
Q5S007	LRRK2	9	A3ZH	THCA
P02751	FN1	47	A3ZK	THCA
P04626	ERBB2	8	A3ZK	THCA
P06748	NPM1	45	A3ZK	THCA
P21333	FLNA	13	A3ZK	THCA
P27635	RPL10	50	A3ZK	THCA
P29692	EEF1D	6	A3ZK	THCA
P35222	CTNNB1	7	A3ZK	THCA
P46940	IQGAP1	6	A3ZK	THCA
P62280	RPS11	9	A3ZK	THCA
Q5S007	LRRK2	33	A3ZK	THCA
O95166	GABARAP	38	A3ZL	THCA
P02751	FN1	29	A3ZL	THCA
P04792	HSPB1	10	A3ZL	THCA
P08670	VIM	5	A3ZL	THCA
P21333	FLNA	10	A3ZL	THCA
P21926	CD9	4	A3ZL	THCA
P30101	PDIA3	5	A3ZL	THCA
P62280	RPS11	3	A3ZL	THCA
Q08117	AES	3	A3ZL	THCA
Q5S007	LRRK2	22	A3ZL	THCA
P02751	FN1	75	A3ZM	THCA
P04792	HSPB1	15	A3ZM	THCA
P06748	NPM1	55	A3ZM	THCA
P08238	HSP90AB1	20	A3ZM	THCA
P21333	FLNA	20	A3ZM	THCA
P27635	RPL10	61	A3ZM	THCA
P35579	MYH9	30	A3ZM	THCA
P46940	IQGAP1	15	A3ZM	THCA
P60709	ACTB	46	A3ZM	THCA
P63104	YWHAZ	37	A3ZM	THCA
O95166	GABARAP	54	A3ZO	THCA
P02751	FN1	46	A3ZO	THCA
P04792	HSPB1	10	A3ZO	THCA
P21333	FLNA	17	A3ZO	THCA
P27635	RPL10	35	A3ZO	THCA
P35579	MYH9	25	A3ZO	THCA
P46940	IQGAP1	13	A3ZO	THCA
P62140	PPP1CB	13	A3ZO	THCA
P63104	YWHAZ	24	A3ZO	THCA
Q5S007	LRRK2	39	A3ZO	THCA
O14503	BHLHE40	5	A3ZP	THCA
O95166	GABARAP	47	A3ZP	THCA
P02751	FN1	40	A3ZP	THCA
P04792	HSPB1	12	A3ZP	THCA
P08670	VIM	9	A3ZP	THCA
P21333	FLNA	13	A3ZP	THCA
P35579	MYH9	21	A3ZP	THCA
P60709	ACTB	29	A3ZP	THCA
P63104	YWHAZ	26	A3ZP	THCA
Q5S007	LRRK2	32	A3ZP	THCA
O95166	GABARAP	77	A3ZQ	THCA
P02751	FN1	61	A3ZQ	THCA
P04626	ERBB2	14	A3ZQ	THCA
P04792	HSPB1	11	A3ZQ	THCA
P26641	EEF1G	8	A3ZQ	THCA
P27635	RPL10	60	A3ZQ	THCA
P55209	NAP1L1	7	A3ZQ	THCA
P62136	PPP1CA	9	A3ZQ	THCA
P62280	RPS11	9	A3ZQ	THCA
P63000	RAC1	5	A3ZQ	THCA
O95166	GABARAP	49	A3ZR	THCA
P04626	ERBB2	5	A3ZR	THCA
P04792	HSPB1	9	A3ZR	THCA
P26641	EEF1G	5	A3ZR	THCA
P27635	RPL10	32	A3ZR	THCA
P29692	EEF1D	5	A3ZR	THCA
P31749	AKT1	5	A3ZR	THCA
P62280	RPS11	5	A3ZR	THCA
Q08117	AES	4	A3ZR	THCA
Q5S007	LRRK2	24	A3ZR	THCA
P02751	FN1	17	A3ZS	THCA
P04626	ERBB2	7	A3ZS	THCA
P12830	CDH1	5	A3ZS	THCA
P21333	FLNA	10	A3ZS	THCA
P30101	PDIA3	6	A3ZS	THCA
P34741	SDC2	3	A3ZS	THCA
P35222	CTNNB1	6	A3ZS	THCA
P35579	MYH9	15	A3ZS	THCA
P46940	IQGAP1	6	A3ZS	THCA
Q5S007	LRRK2	6	A3ZS	THCA
O00159	MYO1C	10	A3ZT	THCA
O95166	GABARAP	61	A3ZT	THCA
P02751	FN1	43	A3ZT	THCA
P04792	HSPB1	13	A3ZT	THCA
P21333	FLNA	18	A3ZT	THCA
P46940	IQGAP1	14	A3ZT	THCA
P60709	ACTB	30	A3ZT	THCA
P63104	YWHAZ	28	A3ZT	THCA
Q5S007	LRRK2	38	A3ZT	THCA
Q8N3V7	SYNPO	15	A3ZT	THCA
O95166	GABARAP	41	A41I	THCA
P02751	FN1	37	A41I	THCA
P04792	HSPB1	11	A41I	THCA
P05412	JUN	72	A41I	THCA
P0CG48	UBC	4	A41I	THCA
P38936	CDKN1A	5	A41I	THCA
P62280	RPS11	4	A41I	THCA
Q13501	SQSTM1	6	A41I	THCA
Q14204	DYNC1H1	5	A41I	THCA
Q5S007	LRRK2	29	A41I	THCA
O95166	GABARAP	84	A41J	THCA
P02751	FN1	62	A41J	THCA
P04626	ERBB2	13	A41J	THCA
P04792	HSPB1	15	A41J	THCA
P06748	NPM1	50	A41J	THCA
P08238	HSP90AB1	18	A41J	THCA
P21333	FLNA	19	A41J	THCA
P27635	RPL10	60	A41J	THCA
P60709	ACTB	41	A41J	THCA
P62136	PPP1CA	11	A41J	THCA
O95166	GABARAP	74	A41L	THCA
P04792	HSPB1	10	A41L	THCA
P06748	NPM1	47	A41L	THCA
P08670	VIM	6	A41L	THCA
P27635	RPL10	51	A41L	THCA
P35579	MYH9	16	A41L	THCA
P60709	ACTB	29	A41L	THCA
P62280	RPS11	7	A41L	THCA
P63104	YWHAZ	28	A41L	THCA
Q13547	HDAC1	6	A41L	THCA

## Sheet: PRAD
Target Uniprotkb	Target Genesymbol	Connections	Patient	Tissue		Target Uniprotkb	Target Genesymbol	N patients PRAD
P04179	SOD2	3	5761	PRAD		P11021	HSPA5	31
P06748	NPM1	29	5761	PRAD		P08238	HSP90AB1	30
P07900	HSP90AA1	3	5761	PRAD		P27635	RPL10	30
P0CG48	UBC	4	5761	PRAD		P06748	NPM1	29
P27635	RPL10	34	5761	PRAD		Q92597	NDRG1	28
P62140	PPP1CB	3	5761	PRAD		P62280	RPS11	23
P62277	RPS13	2	5761	PRAD		P35579	MYH9	22
P62280	RPS11	5	5761	PRAD		P27824	CANX	18
P63104	YWHAZ	9	5761	PRAD		P05412	JUN	16
Q09666	AHNAK	2	5761	PRAD		P63244	GNB2L1	14
P01023	A2M	10	5768	PRAD		Q00839	HNRNPU	14
P01100	FOS	9	5768	PRAD		P01023	A2M	12
P01106	MYC	42	5768	PRAD		P01106	MYC	12
P05412	JUN	150	5768	PRAD		P02751	FN1	12
P06748	NPM1	56	5768	PRAD		P30101	PDIA3	12
P11021	HSPA5	11	5768	PRAD		P07900	HSP90AA1	11
P27635	RPL10	64	5768	PRAD		P49755	TMED10	11
P51617	IRAK1	11	5768	PRAD		P01100	FOS	10
P62280	RPS11	10	5768	PRAD		P26641	EEF1G	10
P67809	YBX1	24	5768	PRAD		Q9UH99	SUN2	10
P04179	SOD2	3	5769	PRAD		P62140	PPP1CB	9
P06748	NPM1	29	5769	PRAD		O95166	GABARAP	8
P07900	HSP90AA1	3	5769	PRAD		P08473	MME	8
P0CG48	UBC	4	5769	PRAD		P21860	ERBB3	8
P27635	RPL10	34	5769	PRAD		P04626	ERBB2	7
P62140	PPP1CB	3	5769	PRAD		P21333	FLNA	7
P62277	RPS13	2	5769	PRAD		Q13547	HDAC1	7
P62280	RPS11	5	5769	PRAD		O15027	SEC16A	6
P63104	YWHAZ	9	5769	PRAD		P31749	AKT1	6
Q09666	AHNAK	2	5769	PRAD		P63104	YWHAZ	6
P01100	FOS	7	6333	PRAD		P05067	APP	5
P05412	JUN	56	6333	PRAD		P0CG48	UBC	5
P11021	HSPA5	7	6333	PRAD		P61981	YWHAG	5
P27824	CANX	4	6333	PRAD		P60709	ACTB	4
P30101	PDIA3	4	6333	PRAD		P09651	HNRNPA1	3
P31749	AKT1	7	6333	PRAD		P51617	IRAK1	3
P49755	TMED10	5	6333	PRAD		Q92900	UPF1	3
P62140	PPP1CB	7	6333	PRAD		Q9BVK6	TMED9	3
Q92597	NDRG1	7	6333	PRAD		P04179	SOD2	2
Q9UH99	SUN2	4	6333	PRAD		P08670	VIM	2
P01023	A2M	6	6342	PRAD		P40763	STAT3	2
P08238	HSP90AB1	9	6342	PRAD		P62277	RPS13	2
P11021	HSPA5	9	6342	PRAD		P67809	YBX1	2
P17844	DDX5	4	6342	PRAD		Q09666	AHNAK	2
P21333	FLNA	7	6342	PRAD		Q12873	CHD3	2
P30101	PDIA3	4	6342	PRAD		Q96RR4	CAMKK2	2
P35579	MYH9	9	6342	PRAD		O15372	EIF3H	1
Q13547	HDAC1	4	6342	PRAD		P00519	ABL1	1
Q92597	NDRG1	5	6342	PRAD		P05386	RPLP1	1
Q92841	DDX17	3	6342	PRAD		P12830	CDH1	1
O95166	GABARAP	82	6348	PRAD		P17844	DDX5	1
P02751	FN1	58	6348	PRAD		P18847	ATF3	1
P06748	NPM1	47	6348	PRAD		P19320	VCAM1	1
P08238	HSP90AB1	16	6348	PRAD		P19338	NCL	1
P11021	HSPA5	12	6348	PRAD		P27348	YWHAQ	1
P27635	RPL10	56	6348	PRAD		P30153	PPP2R1A	1
P62280	RPS11	8	6348	PRAD		P42224	STAT1	1
P63104	YWHAZ	31	6348	PRAD		P43243	MATR3	1
Q00839	HNRNPU	46	6348	PRAD		P46940	IQGAP1	1
Q92597	NDRG1	18	6348	PRAD		P60520	GABARAPL2	1
P05067	APP	5	6351	PRAD		P62136	PPP1CA	1
P05412	JUN	78	6351	PRAD		P62263	RPS14	1
P0CG48	UBC	6	6351	PRAD		P62993	GRB2	1
P11021	HSPA5	7	6351	PRAD		P68104	EEF1A1	1
P27635	RPL10	23	6351	PRAD		Q00610	CLTC	1
P27824	CANX	4	6351	PRAD		Q01844	EWSR1	1
P30101	PDIA3	4	6351	PRAD		Q04637	EIF4G1	1
P35579	MYH9	7	6351	PRAD		Q09472	EP300	1
P49755	TMED10	4	6351	PRAD		Q13162	PRDX4	1
P63244	GNB2L1	4	6351	PRAD		Q13573	SNW1	1
P01023	A2M	9	6356	PRAD		Q15428	SF3A2	1
P06748	NPM1	33	6356	PRAD		Q15637	SF1	1
P08238	HSP90AB1	9	6356	PRAD		Q6IQ23	PLEKHA7	1
P08473	MME	8	6356	PRAD		Q8IWL3	HSCB	1
P11021	HSPA5	9	6356	PRAD		Q8N3V7	SYNPO	1
P27635	RPL10	41	6356	PRAD		Q92841	DDX17	1
P27824	CANX	6	6356	PRAD		Q96BA8	CREB3L1	1
P30101	PDIA3	6	6356	PRAD		Q99459	CDC5L	1
P63244	GNB2L1	6	6356	PRAD		Q9BY84	DUSP16	1
Q92597	NDRG1	13	6356	PRAD		Q9H0R8	GABARAPL1	1
O95166	GABARAP	79	6362	PRAD		Q9UQ80	PA2G4	1
P06748	NPM1	53	6362	PRAD		Q9UQB8	BAIAP2	1
P08670	VIM	6	6362	PRAD
P09651	HNRNPA1	6	6362	PRAD
P26641	EEF1G	7	6362	PRAD
P27635	RPL10	59	6362	PRAD
P30101	PDIA3	5	6362	PRAD
P30153	PPP2R1A	5	6362	PRAD
P62280	RPS11	8	6362	PRAD
P68104	EEF1A1	5	6362	PRAD
P02751	FN1	54	6363	PRAD
P06748	NPM1	36	6363	PRAD
P07900	HSP90AA1	6	6363	PRAD
P0CG48	UBC	5	6363	PRAD
P11021	HSPA5	7	6363	PRAD
P27635	RPL10	40	6363	PRAD
P27824	CANX	6	6363	PRAD
P49755	TMED10	5	6363	PRAD
P62280	RPS11	5	6363	PRAD
Q13162	PRDX4	4	6363	PRAD
P01023	A2M	8	6365	PRAD
P02751	FN1	52	6365	PRAD
P06748	NPM1	45	6365	PRAD
P21333	FLNA	7	6365	PRAD
P35579	MYH9	13	6365	PRAD
P62140	PPP1CB	8	6365	PRAD
P62280	RPS11	8	6365	PRAD
P63244	GNB2L1	5	6365	PRAD
P67809	YBX1	19	6365	PRAD
Q8N3V7	SYNPO	6	6365	PRAD
P01023	A2M	6	6384	PRAD
P01100	FOS	5	6384	PRAD
P05067	APP	5	6384	PRAD
P06748	NPM1	24	6384	PRAD
P26641	EEF1G	5	6384	PRAD
P30101	PDIA3	8	6384	PRAD
P35579	MYH9	7	6384	PRAD
P63244	GNB2L1	5	6384	PRAD
Q09472	EP300	7	6384	PRAD
Q92597	NDRG1	10	6384	PRAD
P04626	ERBB2	11	6496	PRAD
P05386	RPLP1	4	6496	PRAD
P06748	NPM1	41	6496	PRAD
P21860	ERBB3	4	6496	PRAD
P26641	EEF1G	6	6496	PRAD
P30101	PDIA3	4	6496	PRAD
P31749	AKT1	5	6496	PRAD
P63244	GNB2L1	5	6496	PRAD
Q9UQ80	PA2G4	16	6496	PRAD
Q9UQB8	BAIAP2	3	6496	PRAD
O95166	GABARAP	44	6499	PRAD
P01100	FOS	7	6499	PRAD
P05067	APP	6	6499	PRAD
P05412	JUN	80	6499	PRAD
P11021	HSPA5	6	6499	PRAD
P27635	RPL10	16	6499	PRAD
P27824	CANX	6	6499	PRAD
P40763	STAT3	6	6499	PRAD
Q00839	HNRNPU	11	6499	PRAD
Q15637	SF1	7	6499	PRAD
O15027	SEC16A	4	7115	PRAD
P02751	FN1	25	7115	PRAD
P05412	JUN	54	7115	PRAD
P19338	NCL	3	7115	PRAD
P30101	PDIA3	3	7115	PRAD
P35579	MYH9	9	7115	PRAD
P51617	IRAK1	3	7115	PRAD
Q00839	HNRNPU	11	7115	PRAD
Q92900	UPF1	5	7115	PRAD
Q9UH99	SUN2	5	7115	PRAD
O95166	GABARAP	81	7123	PRAD
P04626	ERBB2	21	7123	PRAD
P06748	NPM1	47	7123	PRAD
P08238	HSP90AB1	14	7123	PRAD
P08473	MME	10	7123	PRAD
P11021	HSPA5	10	7123	PRAD
P27635	RPL10	54	7123	PRAD
P27824	CANX	7	7123	PRAD
P62280	RPS11	8	7123	PRAD
Q92597	NDRG1	14	7123	PRAD
P01023	A2M	7	7125	PRAD
P01100	FOS	7	7125	PRAD
P02751	FN1	30	7125	PRAD
P04626	ERBB2	13	7125	PRAD
P05412	JUN	63	7125	PRAD
P11021	HSPA5	8	7125	PRAD
P21333	FLNA	10	7125	PRAD
P35579	MYH9	15	7125	PRAD
P61981	YWHAG	7	7125	PRAD
Q9UH99	SUN2	7	7125	PRAD
P05412	JUN	66	7211	PRAD
P07900	HSP90AA1	11	7211	PRAD
P08238	HSP90AB1	11	7211	PRAD
P11021	HSPA5	7	7211	PRAD
P35579	MYH9	13	7211	PRAD
P46940	IQGAP1	9	7211	PRAD
P61981	YWHAG	6	7211	PRAD
P62140	PPP1CB	10	7211	PRAD
Q92597	NDRG1	10	7211	PRAD
Q9BY84	DUSP16	7	7211	PRAD
O95166	GABARAP	75	7314	PRAD
P06748	NPM1	53	7314	PRAD
P08238	HSP90AB1	13	7314	PRAD
P26641	EEF1G	7	7314	PRAD
P27635	RPL10	62	7314	PRAD
P62280	RPS11	9	7314	PRAD
P63244	GNB2L1	6	7314	PRAD
Q00839	HNRNPU	50	7314	PRAD
Q13547	HDAC1	6	7314	PRAD
Q92597	NDRG1	11	7314	PRAD
P02751	FN1	53	7315	PRAD
P06748	NPM1	45	7315	PRAD
P08238	HSP90AB1	14	7315	PRAD
P11021	HSPA5	9	7315	PRAD
P27635	RPL10	50	7315	PRAD
P35579	MYH9	10	7315	PRAD
P49755	TMED10	6	7315	PRAD
P62280	RPS11	8	7315	PRAD
P63104	YWHAZ	30	7315	PRAD
Q00839	HNRNPU	40	7315	PRAD
O95166	GABARAP	81	7317	PRAD
P01023	A2M	10	7317	PRAD
P04626	ERBB2	16	7317	PRAD
P06748	NPM1	47	7317	PRAD
P08238	HSP90AB1	13	7317	PRAD
P11021	HSPA5	8	7317	PRAD
P27635	RPL10	51	7317	PRAD
P27824	CANX	7	7317	PRAD
P62280	RPS11	8	7317	PRAD
Q9UH99	SUN2	7	7317	PRAD
O15372	EIF3H	9	7321	PRAD
P01100	FOS	8	7321	PRAD
P01106	MYC	34	7321	PRAD
P06748	NPM1	59	7321	PRAD
P08238	HSP90AB1	16	7321	PRAD
P09651	HNRNPA1	8	7321	PRAD
P27635	RPL10	65	7321	PRAD
P43243	MATR3	12	7321	PRAD
P62280	RPS11	10	7321	PRAD
Q00839	HNRNPU	55	7321	PRAD
P01106	MYC	34	7327	PRAD
P02751	FN1	36	7327	PRAD
P06748	NPM1	12	7327	PRAD
P08238	HSP90AB1	14	7327	PRAD
P21333	FLNA	13	7327	PRAD
P35579	MYH9	20	7327	PRAD
P60709	ACTB	16	7327	PRAD
Q00839	HNRNPU	9	7327	PRAD
Q13547	HDAC1	8	7327	PRAD
Q92597	NDRG1	8	7327	PRAD
P06748	NPM1	55	7328	PRAD
P08238	HSP90AB1	12	7328	PRAD
P09651	HNRNPA1	8	7328	PRAD
P26641	EEF1G	6	7328	PRAD
P27635	RPL10	62	7328	PRAD
P62280	RPS11	9	7328	PRAD
P63244	GNB2L1	6	7328	PRAD
Q01844	EWSR1	5	7328	PRAD
Q13547	HDAC1	5	7328	PRAD
Q92597	NDRG1	13	7328	PRAD
O15027	SEC16A	5	7330	PRAD
P01100	FOS	4	7330	PRAD
P08238	HSP90AB1	8	7330	PRAD
P08473	MME	4	7330	PRAD
P11021	HSPA5	8	7330	PRAD
P21860	ERBB3	5	7330	PRAD
P35579	MYH9	8	7330	PRAD
Q00839	HNRNPU	4	7330	PRAD
Q92597	NDRG1	8	7330	PRAD
Q9UH99	SUN2	5	7330	PRAD
O15027	SEC16A	5	7331	PRAD
P06748	NPM1	19	7331	PRAD
P08238	HSP90AB1	8	7331	PRAD
P0CG48	UBC	4	7331	PRAD
P11021	HSPA5	8	7331	PRAD
P21860	ERBB3	6	7331	PRAD
P27348	YWHAQ	4	7331	PRAD
P27824	CANX	6	7331	PRAD
P49755	TMED10	4	7331	PRAD
P63244	GNB2L1	5	7331	PRAD
P01023	A2M	7	7737	PRAD
P01100	FOS	5	7737	PRAD
P05412	JUN	60	7737	PRAD
P08473	MME	6	7737	PRAD
P18847	ATF3	6	7737	PRAD
P26641	EEF1G	4	7737	PRAD
P31749	AKT1	6	7737	PRAD
P61981	YWHAG	7	7737	PRAD
P63244	GNB2L1	4	7737	PRAD
Q92597	NDRG1	9	7737	PRAD
P06748	NPM1	44	7738	PRAD
P07900	HSP90AA1	10	7738	PRAD
P08238	HSP90AB1	15	7738	PRAD
P08473	MME	12	7738	PRAD
P27635	RPL10	50	7738	PRAD
P35579	MYH9	15	7738	PRAD
P61981	YWHAG	8	7738	PRAD
P62140	PPP1CB	8	7738	PRAD
P62280	RPS11	7	7738	PRAD
Q92597	NDRG1	14	7738	PRAD
P05412	JUN	83	7740	PRAD
P07900	HSP90AA1	10	7740	PRAD
P21333	FLNA	13	7740	PRAD
P27635	RPL10	30	7740	PRAD
P31749	AKT1	8	7740	PRAD
P35579	MYH9	18	7740	PRAD
P60709	ACTB	19	7740	PRAD
P62140	PPP1CB	14	7740	PRAD
Q92597	NDRG1	9	7740	PRAD
Q9UH99	SUN2	7	7740	PRAD
P01023	A2M	6	7742	PRAD
P02751	FN1	21	7742	PRAD
P08670	VIM	7	7742	PRAD
P11021	HSPA5	8	7742	PRAD
P27824	CANX	4	7742	PRAD
P49755	TMED10	5	7742	PRAD
P60709	ACTB	6	7742	PRAD
P63104	YWHAZ	12	7742	PRAD
Q04637	EIF4G1	4	7742	PRAD
Q9BVK6	TMED9	4	7742	PRAD
P01100	FOS	7	7745	PRAD
P01106	MYC	22	7745	PRAD
P05412	JUN	115	7745	PRAD
P06748	NPM1	51	7745	PRAD
P08238	HSP90AB1	16	7745	PRAD
P27635	RPL10	60	7745	PRAD
P35579	MYH9	9	7745	PRAD
P62280	RPS11	9	7745	PRAD
Q12873	CHD3	7	7745	PRAD
Q92597	NDRG1	13	7745	PRAD
P01106	MYC	28	7747	PRAD
P05412	JUN	137	7747	PRAD
P06748	NPM1	54	7747	PRAD
P07900	HSP90AA1	10	7747	PRAD
P08238	HSP90AB1	15	7747	PRAD
P08473	MME	11	7747	PRAD
P27635	RPL10	63	7747	PRAD
P35579	MYH9	8	7747	PRAD
P62280	RPS11	10	7747	PRAD
Q92597	NDRG1	13	7747	PRAD
O95166	GABARAP	56	7752	PRAD
P04626	ERBB2	10	7752	PRAD
P26641	EEF1G	6	7752	PRAD
P27635	RPL10	41	7752	PRAD
P30101	PDIA3	5	7752	PRAD
P31749	AKT1	6	7752	PRAD
P62136	PPP1CA	9	7752	PRAD
P62280	RPS11	6	7752	PRAD
Q15428	SF3A2	5	7752	PRAD
Q96BA8	CREB3L1	4	7752	PRAD
O15027	SEC16A	6	7781	PRAD
P01106	MYC	38	7781	PRAD
P07900	HSP90AA1	8	7781	PRAD
P08238	HSP90AB1	14	7781	PRAD
P11021	HSPA5	10	7781	PRAD
P21860	ERBB3	6	7781	PRAD
P27635	RPL10	29	7781	PRAD
P27824	CANX	7	7781	PRAD
P49755	TMED10	6	7781	PRAD
Q92597	NDRG1	11	7781	PRAD
P00519	ABL1	8	7782	PRAD
P02751	FN1	33	7782	PRAD
P04626	ERBB2	12	7782	PRAD
P08238	HSP90AB1	12	7782	PRAD
P11021	HSPA5	9	7782	PRAD
P12830	CDH1	7	7782	PRAD
P21333	FLNA	14	7782	PRAD
P35579	MYH9	20	7782	PRAD
Q00839	HNRNPU	7	7782	PRAD
Q9UH99	SUN2	8	7782	PRAD
O15027	SEC16A	7	7783	PRAD
P08238	HSP90AB1	10	7783	PRAD
P11021	HSPA5	8	7783	PRAD
P27824	CANX	5	7783	PRAD
P30101	PDIA3	5	7783	PRAD
P35579	MYH9	11	7783	PRAD
Q00839	HNRNPU	14	7783	PRAD
Q12873	CHD3	5	7783	PRAD
Q92597	NDRG1	8	7783	PRAD
Q96RR4	CAMKK2	4	7783	PRAD
P01106	MYC	24	7784	PRAD
P06748	NPM1	38	7784	PRAD
P08238	HSP90AB1	11	7784	PRAD
P26641	EEF1G	5	7784	PRAD
P27635	RPL10	42	7784	PRAD
P35579	MYH9	8	7784	PRAD
P61981	YWHAG	5	7784	PRAD
P62280	RPS11	7	7784	PRAD
Q92597	NDRG1	8	7784	PRAD
Q96RR4	CAMKK2	4	7784	PRAD
P05412	JUN	111	7786	PRAD
P07900	HSP90AA1	7	7786	PRAD
P08238	HSP90AB1	12	7786	PRAD
P11021	HSPA5	7	7786	PRAD
P21860	ERBB3	5	7786	PRAD
P27635	RPL10	48	7786	PRAD
P27824	CANX	6	7786	PRAD
P49755	TMED10	4	7786	PRAD
P62280	RPS11	8	7786	PRAD
P63244	GNB2L1	5	7786	PRAD
P02751	FN1	59	7789	PRAD
P06748	NPM1	49	7789	PRAD
P07900	HSP90AA1	12	7789	PRAD
P08238	HSP90AB1	18	7789	PRAD
P11021	HSPA5	14	7789	PRAD
P27635	RPL10	55	7789	PRAD
P35579	MYH9	14	7789	PRAD
P63104	YWHAZ	39	7789	PRAD
Q00839	HNRNPU	53	7789	PRAD
Q92597	NDRG1	15	7789	PRAD
P01023	A2M	13	7792	PRAD
P02751	FN1	45	7792	PRAD
P05412	JUN	93	7792	PRAD
P06748	NPM1	17	7792	PRAD
P08238	HSP90AB1	14	7792	PRAD
P11021	HSPA5	12	7792	PRAD
P21333	FLNA	11	7792	PRAD
P35579	MYH9	18	7792	PRAD
P60709	ACTB	17	7792	PRAD
Q00839	HNRNPU	14	7792	PRAD
P08238	HSP90AB1	13	7793	PRAD
P11021	HSPA5	7	7793	PRAD
P26641	EEF1G	5	7793	PRAD
P27635	RPL10	43	7793	PRAD
P27824	CANX	6	7793	PRAD
P30101	PDIA3	5	7793	PRAD
P49755	TMED10	4	7793	PRAD
P62280	RPS11	6	7793	PRAD
P63244	GNB2L1	6	7793	PRAD
Q92597	NDRG1	11	7793	PRAD
P01023	A2M	10	7794	PRAD
P01106	MYC	31	7794	PRAD
P05412	JUN	101	7794	PRAD
P06748	NPM1	31	7794	PRAD
P08238	HSP90AB1	12	7794	PRAD
P11021	HSPA5	8	7794	PRAD
P21860	ERBB3	5	7794	PRAD
P27635	RPL10	37	7794	PRAD
P27824	CANX	6	7794	PRAD
P51617	IRAK1	5	7794	PRAD
O15027	SEC16A	7	7797	PRAD
P01106	MYC	30	7797	PRAD
P04626	ERBB2	15	7797	PRAD
P08238	HSP90AB1	12	7797	PRAD
P11021	HSPA5	12	7797	PRAD
P35579	MYH9	9	7797	PRAD
Q00839	HNRNPU	24	7797	PRAD
Q92597	NDRG1	12	7797	PRAD
Q92900	UPF1	7	7797	PRAD
Q9UH99	SUN2	6	7797	PRAD
P05067	APP	7	7819	PRAD
P06748	NPM1	48	7819	PRAD
P08238	HSP90AB1	16	7819	PRAD
P11021	HSPA5	10	7819	PRAD
P27635	RPL10	57	7819	PRAD
P27824	CANX	7	7819	PRAD
P62280	RPS11	8	7819	PRAD
Q00839	HNRNPU	46	7819	PRAD
Q13547	HDAC1	8	7819	PRAD
Q92597	NDRG1	13	7819	PRAD
P01100	FOS	6	8258	PRAD
P01106	MYC	15	8258	PRAD
P05412	JUN	73	8258	PRAD
P08473	MME	7	8258	PRAD
P35579	MYH9	14	8258	PRAD
P40763	STAT3	6	8258	PRAD
P42224	STAT1	5	8258	PRAD
P62140	PPP1CB	8	8258	PRAD
Q92597	NDRG1	9	8258	PRAD
Q9UH99	SUN2	5	8258	PRAD
P01106	MYC	39	8259	PRAD
P06748	NPM1	40	8259	PRAD
P08238	HSP90AB1	13	8259	PRAD
P11021	HSPA5	12	8259	PRAD
P27635	RPL10	44	8259	PRAD
P35579	MYH9	8	8259	PRAD
P63244	GNB2L1	6	8259	PRAD
Q13547	HDAC1	7	8259	PRAD
Q92597	NDRG1	12	8259	PRAD
Q92900	UPF1	6	8259	PRAD
P01023	A2M	5	8260	PRAD
P02751	FN1	39	8260	PRAD
P06748	NPM1	47	8260	PRAD
P11021	HSPA5	8	8260	PRAD
P27635	RPL10	53	8260	PRAD
P30101	PDIA3	4	8260	PRAD
P62263	RPS14	4	8260	PRAD
P62280	RPS11	10	8260	PRAD
P63244	GNB2L1	5	8260	PRAD
Q92597	NDRG1	9	8260	PRAD
O95166	GABARAP	71	8262	PRAD
P06748	NPM1	49	8262	PRAD
P11021	HSPA5	7	8262	PRAD
P26641	EEF1G	6	8262	PRAD
P27635	RPL10	53	8262	PRAD
P27824	CANX	6	8262	PRAD
P62280	RPS11	8	8262	PRAD
P63244	GNB2L1	6	8262	PRAD
Q92597	NDRG1	11	8262	PRAD
Q9UH99	SUN2	7	8262	PRAD
P05067	APP	6	A83J	PRAD
P07900	HSP90AA1	8	A83J	PRAD
P08238	HSP90AB1	10	A83J	PRAD
P11021	HSPA5	11	A83J	PRAD
P21860	ERBB3	7	A83J	PRAD
P27824	CANX	7	A83J	PRAD
P31749	AKT1	8	A83J	PRAD
P49755	TMED10	7	A83J	PRAD
P62140	PPP1CB	6	A83J	PRAD
Q9BVK6	TMED9	5	A83J	PRAD
P08238	HSP90AB1	8	A8F0	PRAD
P08473	MME	7	A8F0	PRAD
P11021	HSPA5	12	A8F0	PRAD
P21860	ERBB3	6	A8F0	PRAD
P27824	CANX	5	A8F0	PRAD
P49755	TMED10	6	A8F0	PRAD
Q00610	CLTC	4	A8F0	PRAD
Q13547	HDAC1	5	A8F0	PRAD
Q92597	NDRG1	5	A8F0	PRAD
Q9BVK6	TMED9	4	A8F0	PRAD
